# Supplementary material for: Functional Network Mapping Reveals State-Dependent Response to IGF1 Treatment in Rett Syndrome
Source: PubMed Central journal article supplement (PMC7465931; doi:10.3390/brainsci10080515), 2020-08-03
Supplement: brainsci-10-00515-s001.pdf [file brainsci-10-00515-s001.pdf]

Supplementary Materials

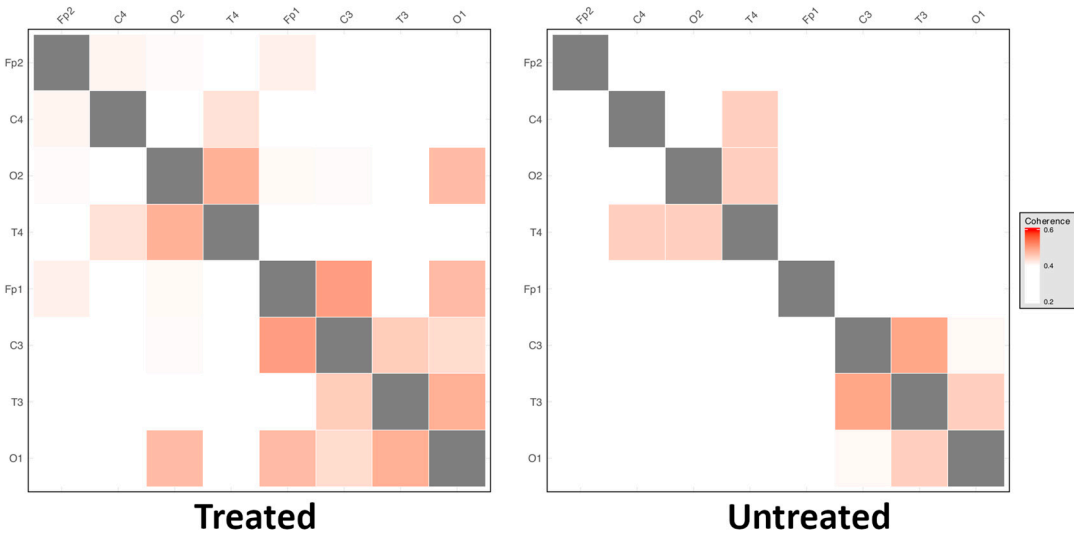

**Figure S1.** Heatmap demonstrating distribution of coherence between individual electrode pairs, treated vs. untreated at baseline. There are statistically significant differences between a number of long-range electrode pairs, suggesting differences in network connectivity at baseline.

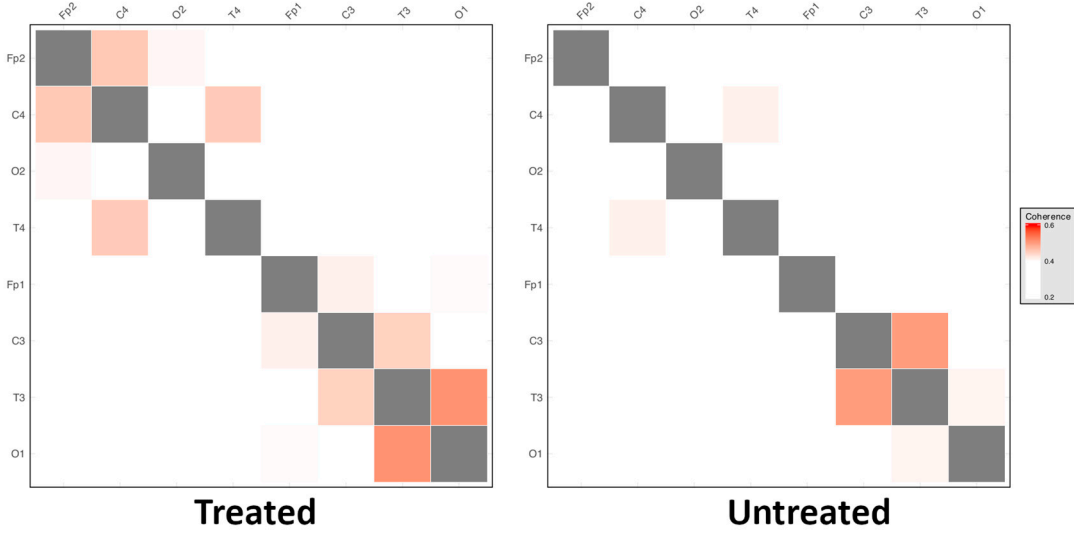

**Figure S2.** Heatmap demonstrating distribution of coherence between individual electrode pairs, treated vs. untreated at twelve months. There were no statistically significant differences between any individual electrode pairs, suggesting a change in connectivity following treatment.

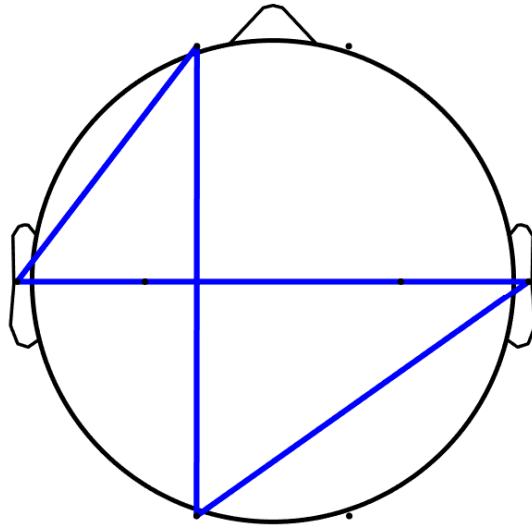

**Figure S3.** Schematic of differences network architecture at baseline, treated vs. untreated groups. Lines join channels with a statistically significant difference in coherence between groups at baseline ( $p < 0.05$ ). The differences in network features were predominantly driven by long-range connections.

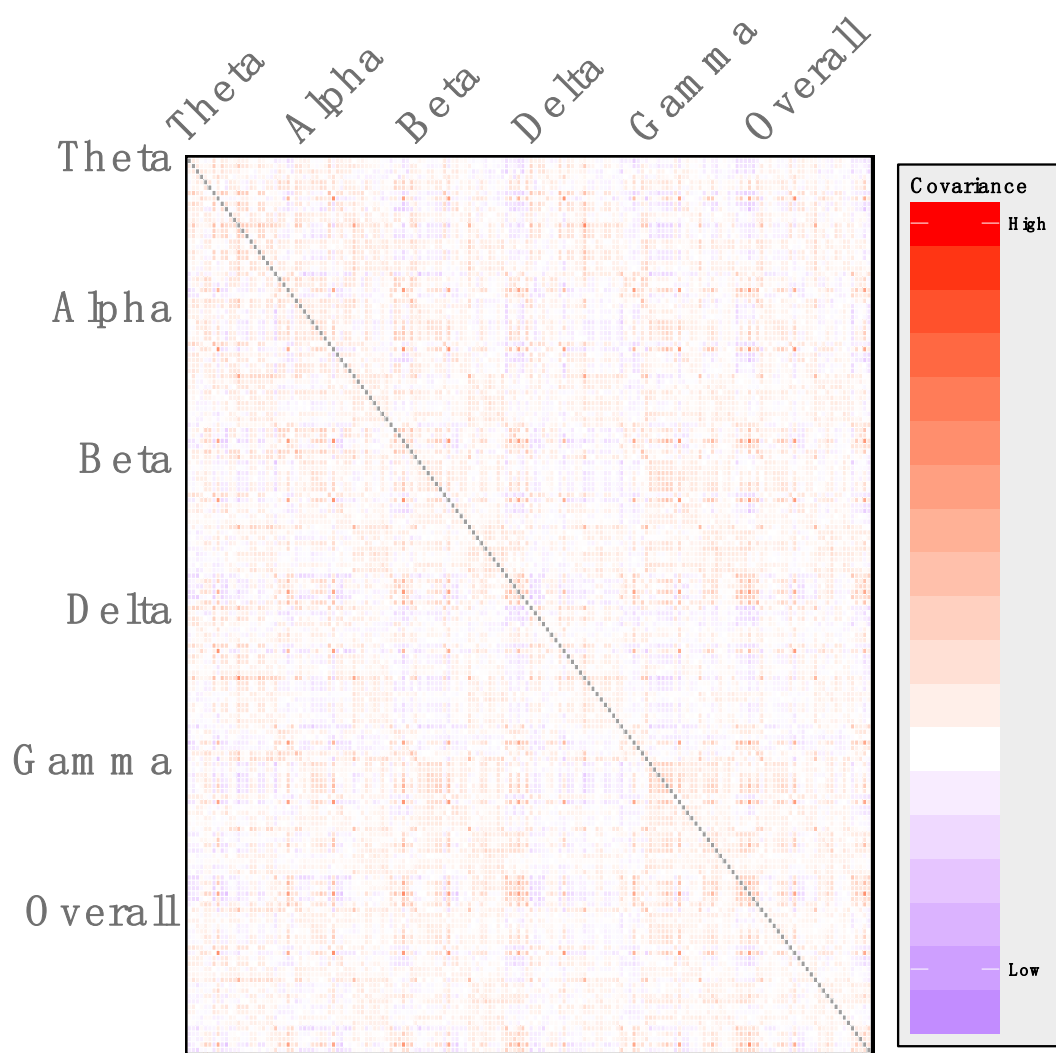

**Figure S4.** Covariance matrix of network measures, treated patients at baseline. There were statistically significant differences in network loadings at baseline between treated and untreated groups, suggesting that network-level differences may exist that were not apparent on clinical assessment. This may have implications for targeting treatment.

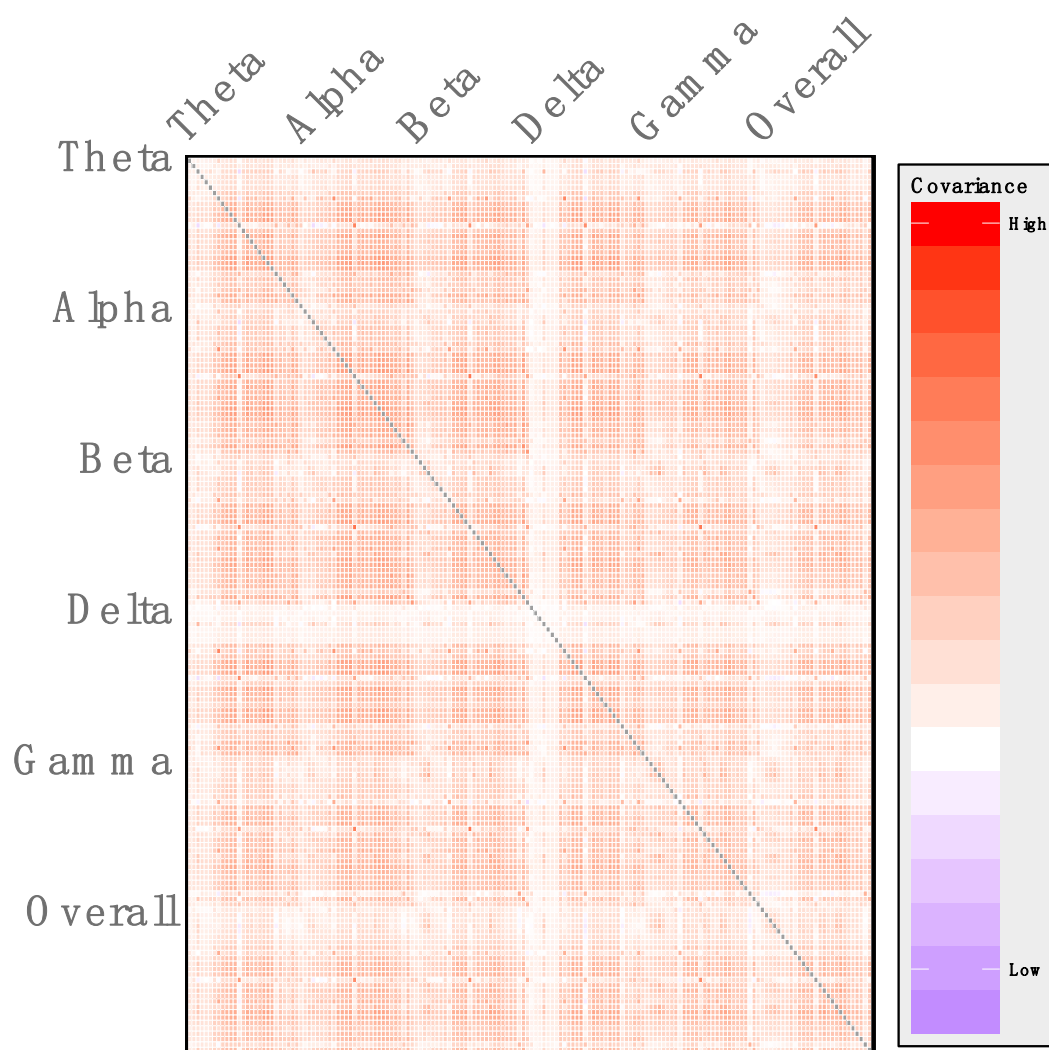

**Figure S5.** Covariance matrix of network measures, untreated patients at baseline. There were statistically significant differences in network loadings at baseline between treated and untreated groups, suggesting that network-level differences may exist that were not apparent on clinical assessment. This may have implications for targeting treatment.

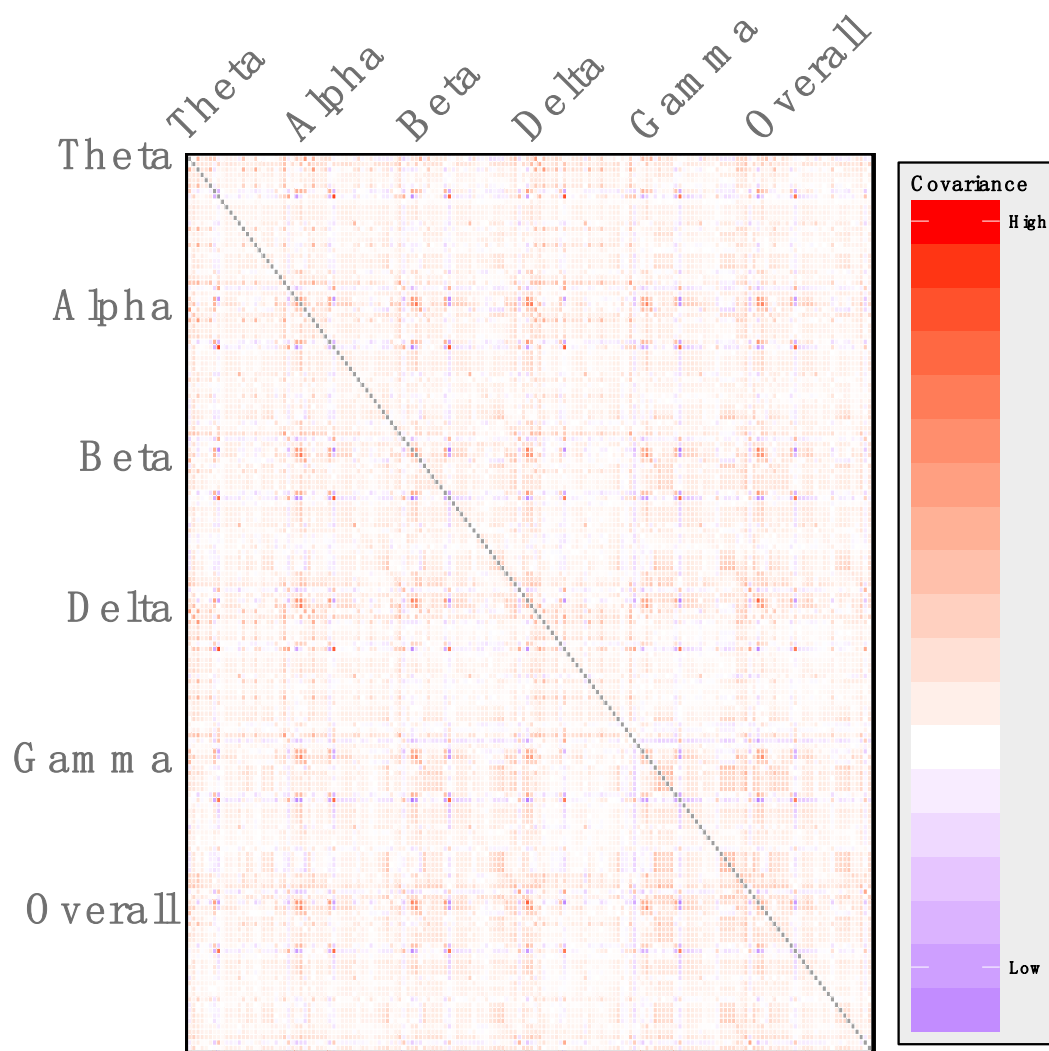

**Figure S6.** Covariance matrix of network measures, treated patients at 12 months. There was a statistically significant effect of treatment group & time on network loadings, suggesting that treatment with IGF-1 caused alterations in cortical electrophysiology. This underlines the emerging importance of network electrophysiology in Rett Syndrome and its treatment and may have implications for targeting treatment based on electrophysiological biomarkers.

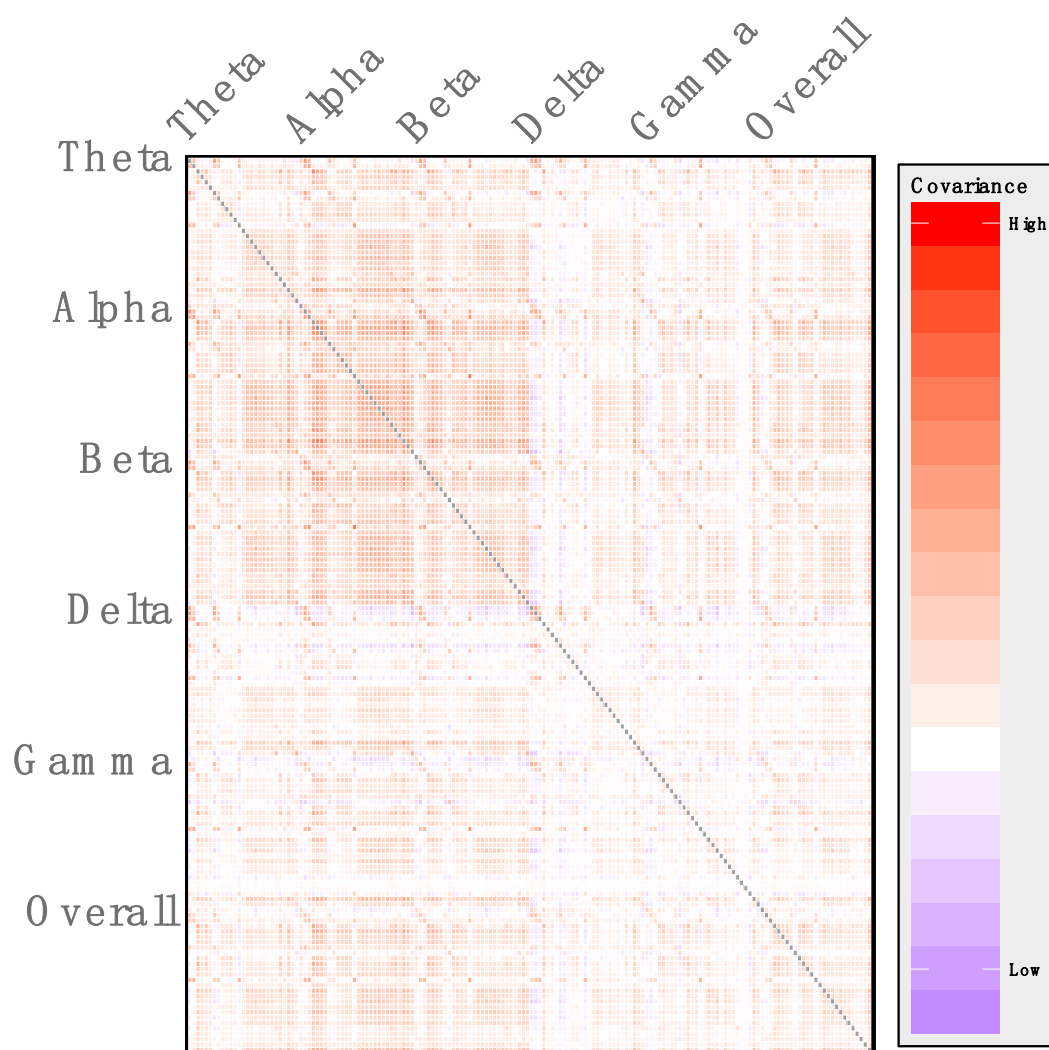

**Figure S7.** Covariance matrix of network measures, untreated patients at 12 months. There was a statistically significant effect of treatment group & time on network loadings, suggesting that treatment with IGF-1 caused alterations in cortical electrophysiology. This underlines the emerging importance of network electrophysiology in Rett Syndrome and its treatment and may have implications for targeting treatment based on electrophysiological biomarkers.

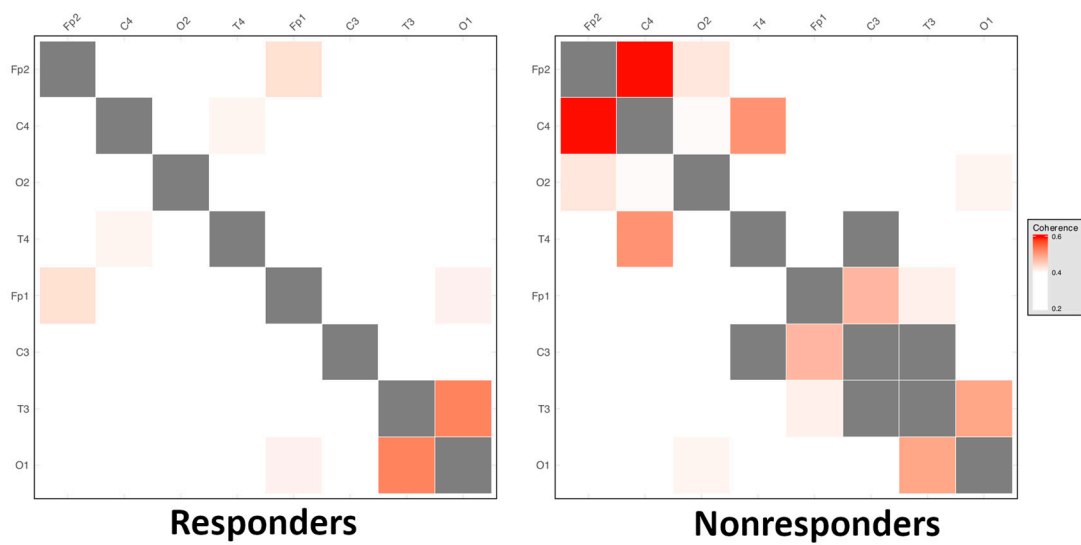

**Figure S8.** Heatmap demonstrating the distribution of coherence measures at individual electrode pairs, responders vs. nonresponders at twelve months. There were no statistically significant differences in coherence between individual electrodes, suggesting that observed differences in overall network architecture are due to an overall pattern change, rather than differences at individual channel pairs.

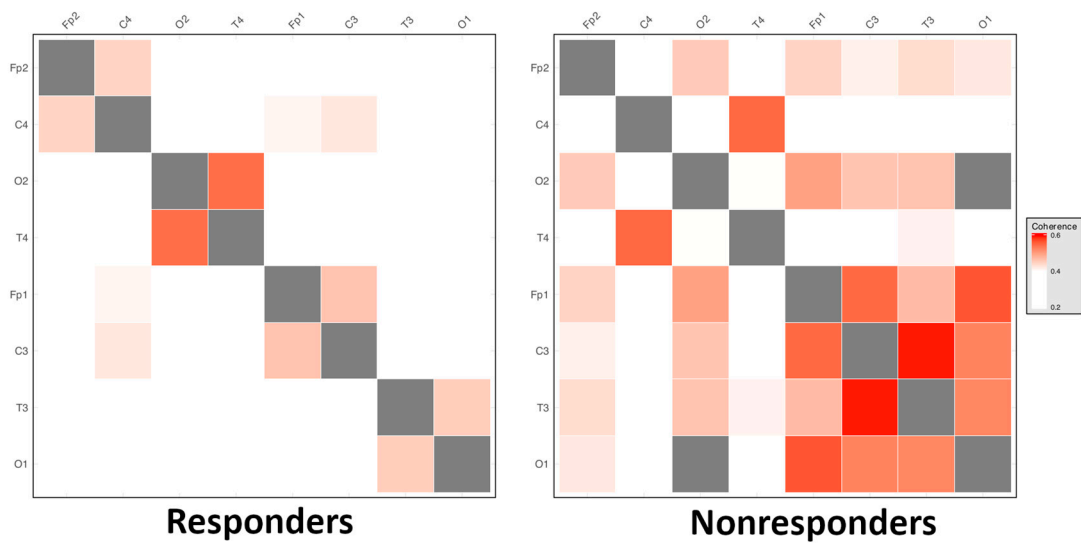

**Figure S9.** Heatmap demonstrating coherence measures at individual electrode pairs, responders vs. nonresponders at baseline. There are a number of statistically significant differences between measures at baseline, suggesting network-level differences between responders and non-responders prior to treatment. These are predominantly long-range pairs.

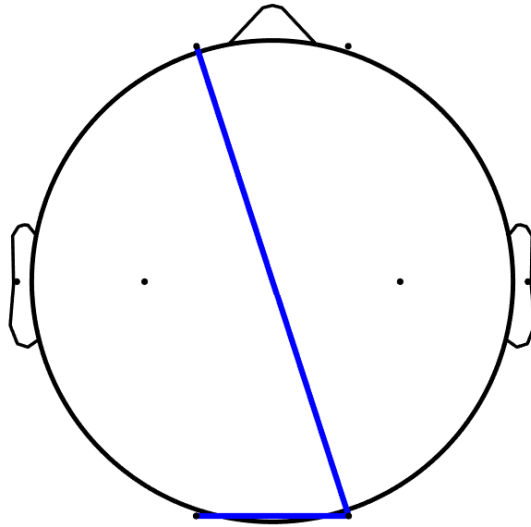

**Figure S10.** Schematic of differences network architecture at baseline, responders vs. nonresponders. Lines join channels with a statistically significant difference in coherence between groups at baseline ( $p < 0.05$ ). The differences in network features were predominantly driven by long-range and occipital interhemispheric connections.



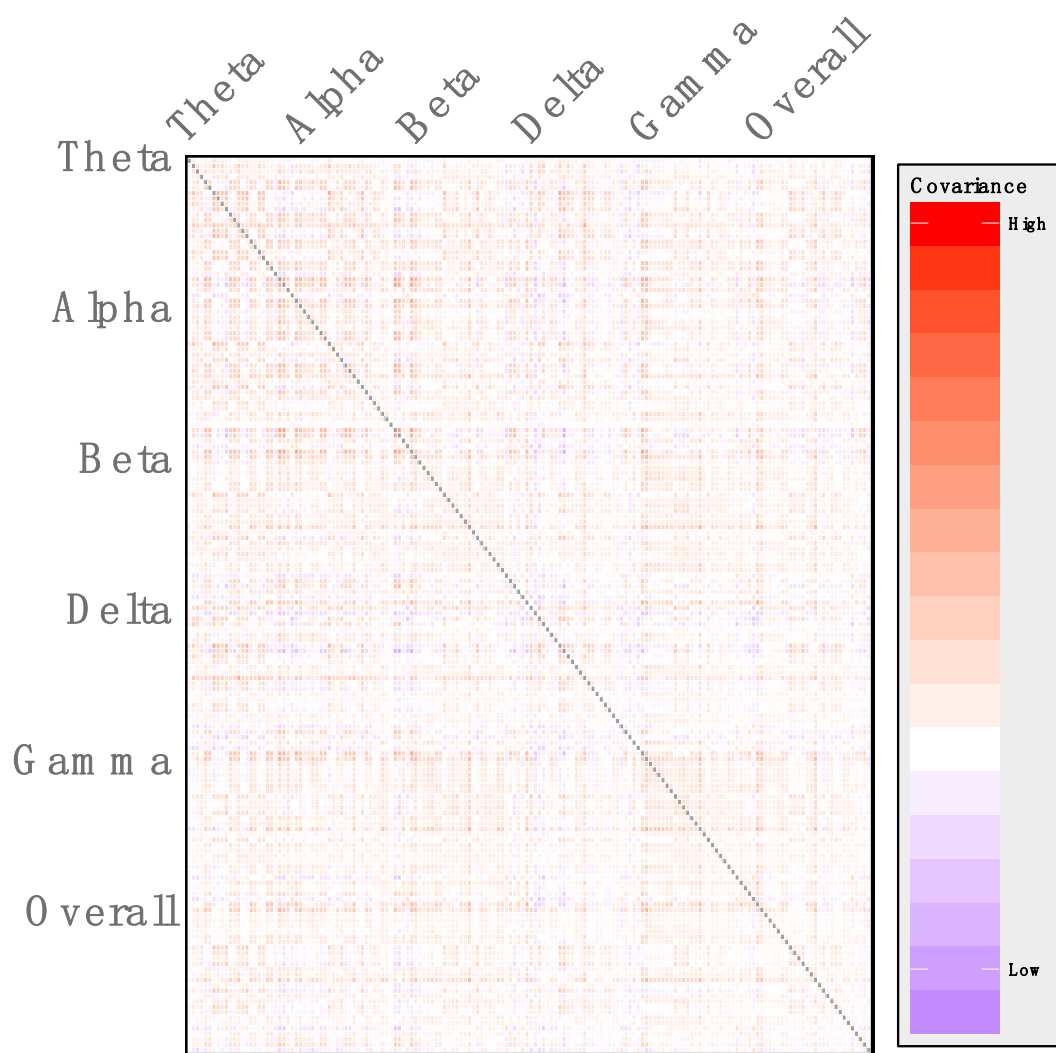

**Figure S11.** Covariance matrix of network measures, responders at baseline. There were statistically significant differences in network loadings at baseline between responders and nonresponders, suggesting that network-level differences may identify those likely to benefit before treatment is initiated. This may have implications for targeting treatment.

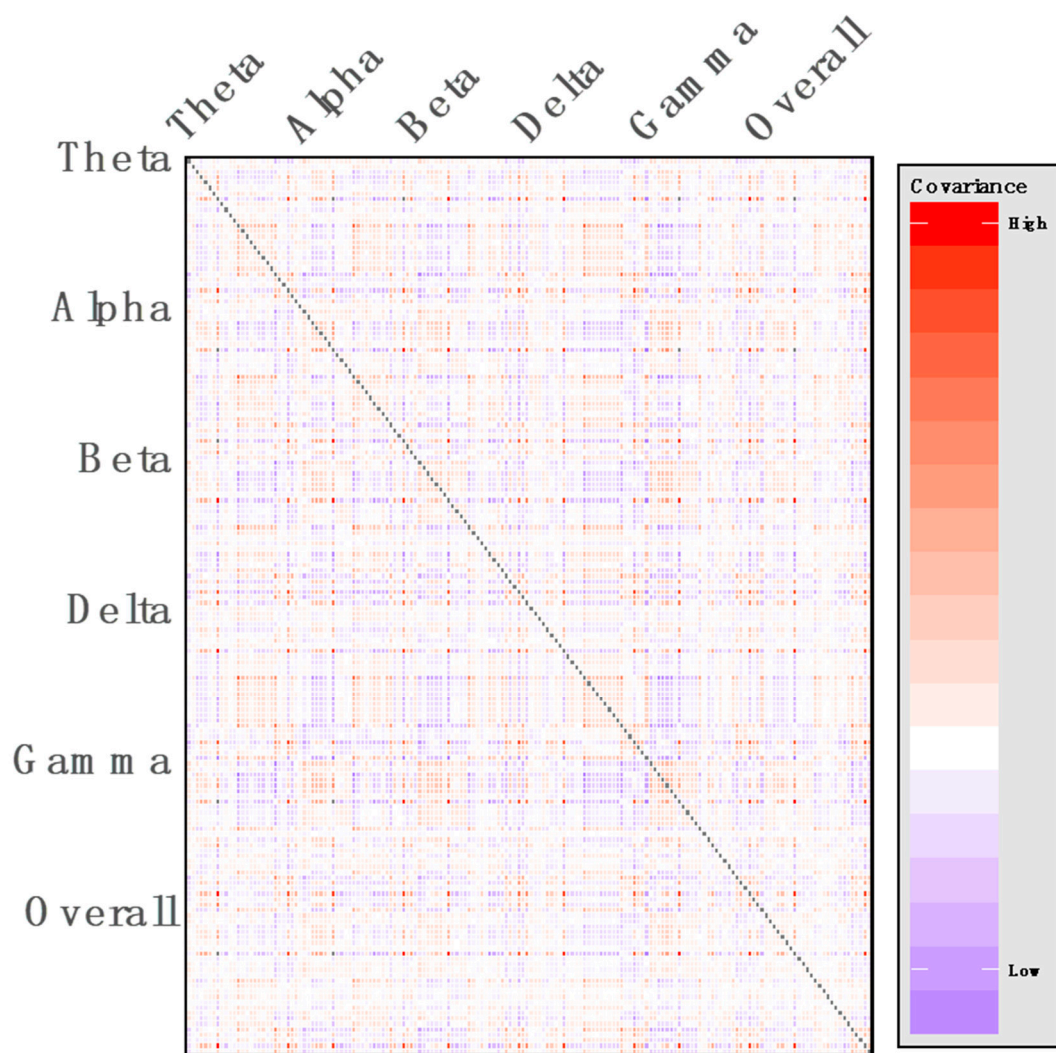

**Figure 12.** Covariance matrix of network measures, nonresponders at baseline. There were statistically significant differences in network loadings at baseline between responders and nonresponders, suggesting that network-level differences may identify those likely to benefit before treatment is initiated. This may have implications for targeting treatment.

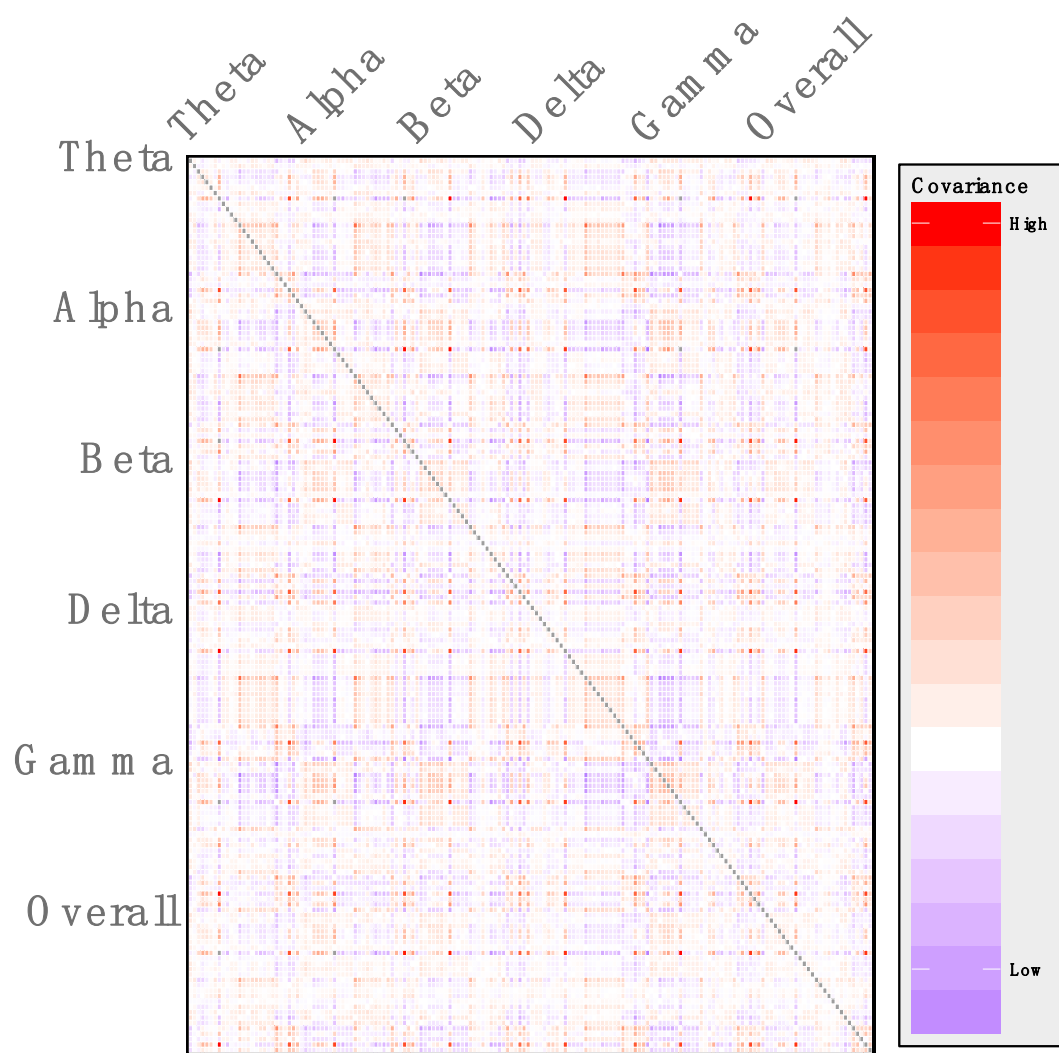

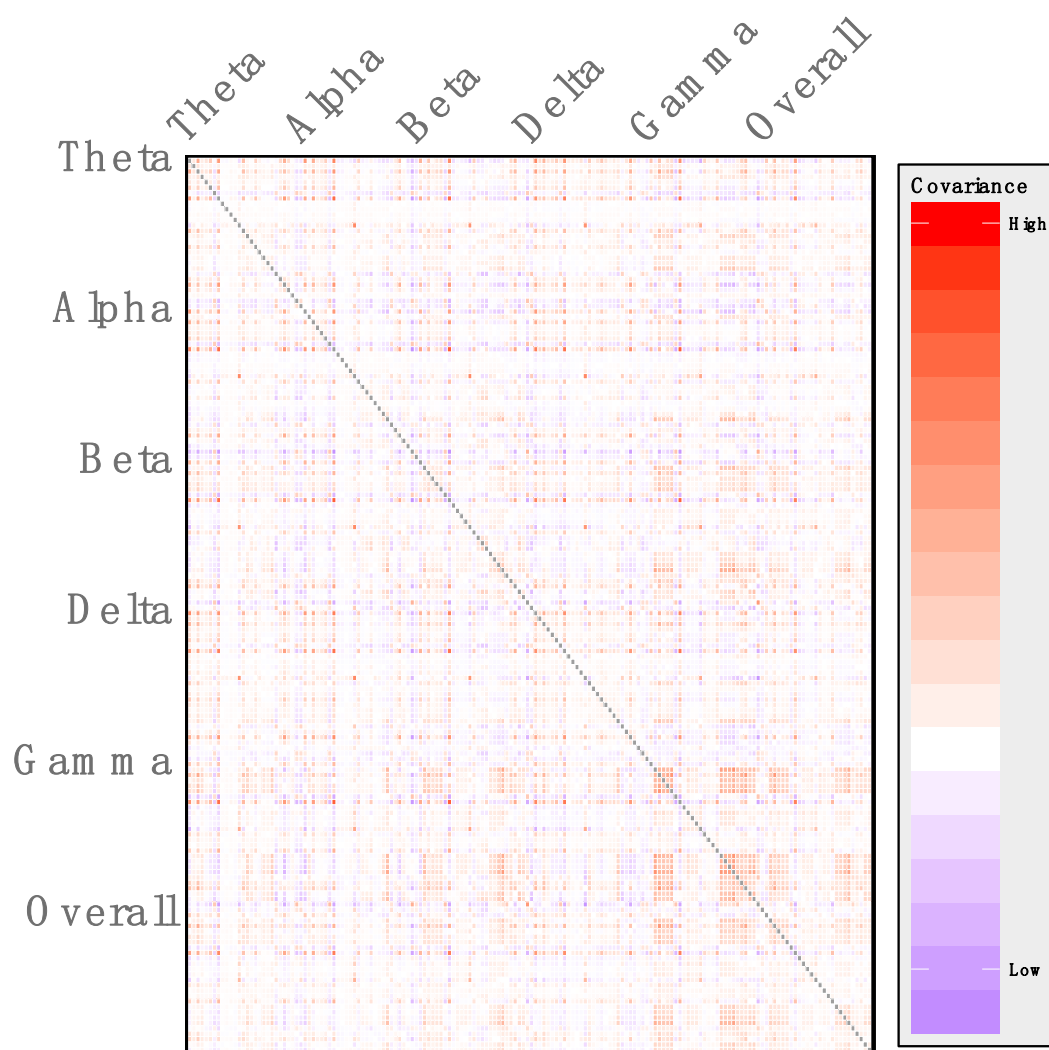

**Figure S13.** Covariance matrix of network measures, responders at 12 months. There was a statistically significant effect of treatment group & time on network loadings, suggesting that there were specific alterations in cortical electrophysiology in those that responded clinically to treatment with IGF-1. This underlines the emerging importance of network electrophysiology in Rett Syndrome and its treatment and may have implications for targeting treatment based on electrophysiological biomarkers.

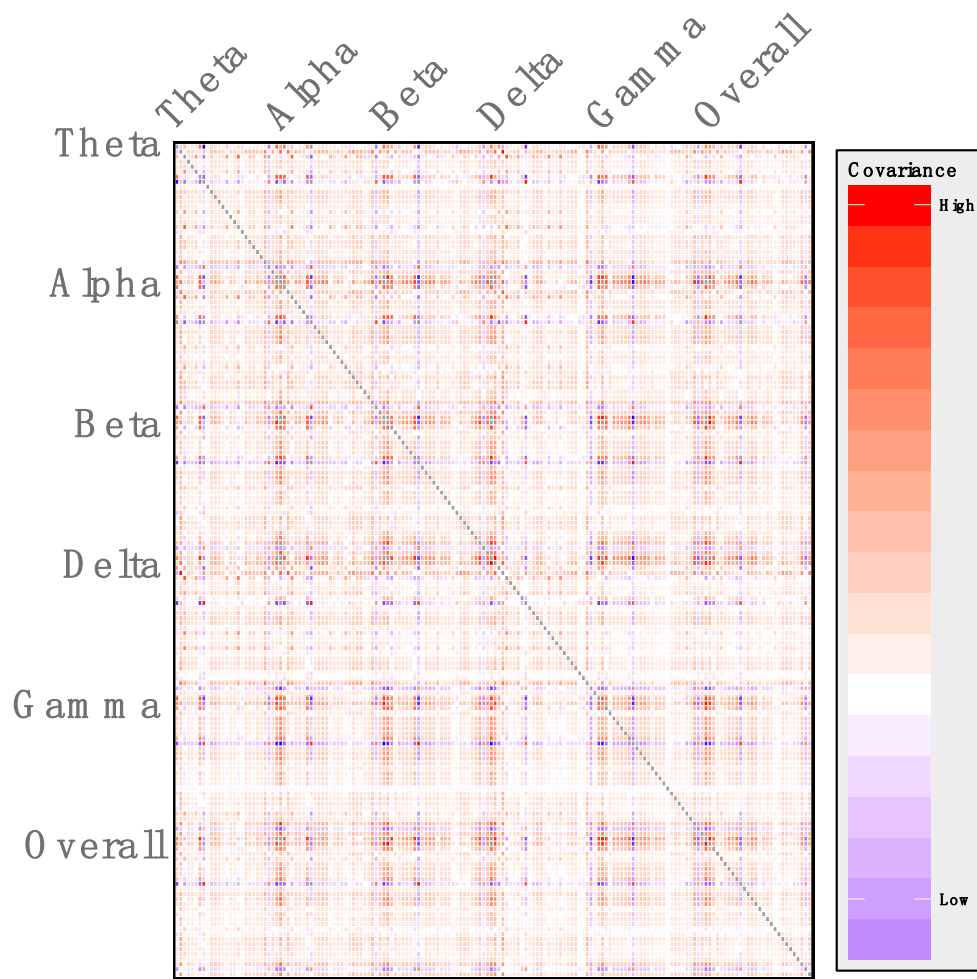

**Figure S14.** Covariance matrix of network measures, nonresponders at 12 months. There was a statistically significant effect of treatment group & time on network loadings, suggesting that there were specific alterations in cortical electrophysiology in those that responded clinically to treatment with IGF-1. This underlines the emerging importance of network electrophysiology in Rett Syndrome and its treatment and may have implications for targeting treatment based on electrophysiological biomarkers

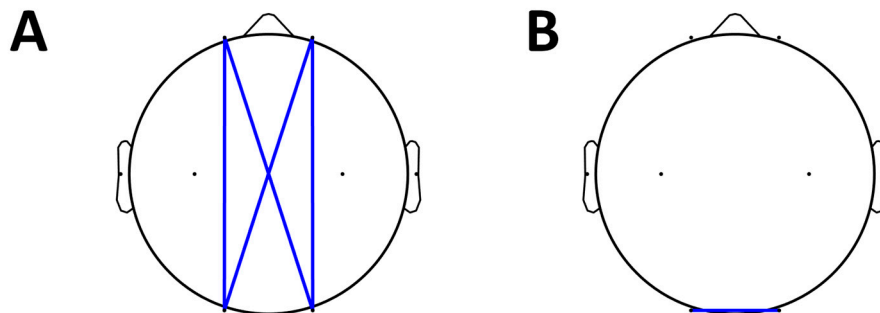

**Figure S15.** Schematic of channels included in prediction model. (A) shows channel pairs included in long-range coherence measure, (B) demonstrates the occipital interhemispheric channel. These channels showed a promising ability to predict treatment response to IGF-1.

**Table S1.** Overall power and power within each band at each electrode location, treated vs. untreated at baseline.

| <b>Band</b> | <b>Treated</b>         | <b>Untreated</b>      | <b><i>p</i></b> |
|-------------|------------------------|-----------------------|-----------------|
| Fp2 Theta   | -47.5507 +/- 143.8417' | -1.6147 +/- 6.5254'   | 0.9047619048    |
| Fp2 Alpha   | -41.4767 +/- 127.0681' | -1.1731 +/- 5.0021'   | 0.9047619048    |
| Fp2 Beta    | -19.384 +/- 62.4975'   | -1.4207 +/- 4.1829'   | 1               |
| Fp2 Delta   | -51.7872 +/- 158.3624' | -2.4492 +/- 8.624'    | 0.9047619048    |
| Fp2 Gamma   | 13.649 +/- 34.4742'    | 0.73436 +/- 0.55074'  | 0.5555555556    |
| Fp2 Overall | -1.9291 +/- 4.3741'    | -3.0949 +/- 4.1132'   | 0.5555555556    |
| C4 Theta    | -5.2122 +/- 49.3782'   | -2.1315 +/- 16.3853'  | 0.5555555556    |
| C4 Alpha    | -5.6285 +/- 41.5282'   | -1.382 +/- 12.4684'   | 0.4126984127    |
| C4 Beta     | -3.1068 +/- 24.7323'   | -1.2585 +/- 9.5609'   | 0.5555555556    |
| C4 Delta    | -3.8606 +/- 60.0226'   | -3.0252 +/- 20.1411'  | 0.5555555556    |
| C4 Gamma    | 2.2582 +/- 10.6184'    | 1.1893 +/- 1.09'      | 0.1904761905    |
| C4 Overall  | 1.0284 +/- 5.1993'     | -3.2215 +/- 4.8507'   | 0.4126984127    |
| T4 Theta    | -0.92801 +/- 9.2063'   | 2.5536 +/- 13.1519'   | 0.5555555556    |
| T4 Alpha    | -0.6639 +/- 7.2729'    | 1.9504 +/- 10.1534'   | 0.5555555556    |
| T4 Beta     | 0.029378 +/- 4.6261'   | 1.4846 +/- 8.3281'    | 0.5555555556    |
| T4 Delta    | -1.0907 +/- 11.2634'   | 2.7077 +/- 17.2825'   | 0.5555555556    |
| T4 Gamma    | 1.3624 +/- 1.6974'     | 0.98807 +/- 0.5479'   | 0.7301587302    |
| T4 Overall  | 3.0692 +/- 6.5926'     | -0.54291 +/- 3.8246'  | 0.4126984127    |
| O2 Theta    | -13.2068 +/- 24.1104'  | 4.0086 +/- 8.1257'    | 0.06349206349   |
| O2 Alpha    | -10.7554 +/- 20.4886'  | 3.1333 +/- 6.0662'    | 0.06349206349   |
| O2 Beta     | -6.3833 +/- 12.8202'   | 2.3972 +/- 4.4152'    | 0.06349206349   |
| O2 Delta    | -15.3746 +/- 26.8835'  | 4.6939 +/- 10.4838'   | 0.06349206349   |
| O2 Gamma    | 3.1233 +/- 4.8017'     | 0.93962 +/- 0.45299'  | 0.5555555556    |
| O2 Overall  | 1.1752 +/- 6.4051'     | -2.5319 +/- 4.6894'   | 0.9047619048    |
| Fp1 Theta   | -6.4613 +/- 11.7724'   | 4.2463 +/- 18.4689'   | 0.9047619048    |
| Fp1 Alpha   | -5.2494 +/- 9.6817'    | 3.7944 +/- 14.4406'   | 0.9047619048    |
| Fp1 Beta    | -2.5847 +/- 6.0835'    | 3.5336 +/- 13.0959'   | 0.9047619048    |
| Fp1 Delta   | -7.7167 +/- 14.3276'   | 5.173 +/- 25.3602'    | 0.9047619048    |
| Fp1 Gamma   | 2.6713 +/- 2.3099'     | 1.5986 +/- 2.0775'    | 1               |
| Fp1 Overall | -1.752 +/- 4.421'      | -2.5234 +/- 3.632'    | 0.7301587302    |
| C3 Theta    | 9.6325 +/- 21.8476'    | -17.3424 +/- 27.7711' | 1               |
| C3 Alpha    | 7.3295 +/- 15.4487'    | -12.9029 +/- 20.9959' | 1               |
| C3 Beta     | 6.7814 +/- 14.3278'    | -11.1367 +/- 18.3301' | 1               |
| C3 Delta    | 11.1757 +/- 26.4174'   | -25.7377 +/- 40.7283' | 1               |
| C3 Gamma    | 1.1272 +/- 1.6614'     | 0.35489 +/- 1.2033'   | 1               |
| C3 Overall  | 1.4238 +/- 4.2144'     | -2.354 +/- 4.9664'    | 0.1111111111    |
| T3 Theta    | 20.8459 +/- 54.9947'   | 9.3832 +/- 17.7964'   | 0.7301587302    |
| T3 Alpha    | 16.5229 +/- 42.9367'   | 7.8688 +/- 14.4523'   | 0.7301587302    |
| T3 Beta     | 11.5948 +/- 28.738'    | 7.0127 +/- 12.8476'   | 0.7301587302    |
| T3 Delta    | 25.4483 +/- 68.4991'   | 12.5056 +/- 25.2996'  | 0.9047619048    |

|                 |                       |                      |              |
|-----------------|-----------------------|----------------------|--------------|
| T3 Gamma        | -0.94198 +/- 6.1223'  | 1.0116 +/- 0.68677'  | 1            |
| T3 Overall      | 3.3901 +/- 4.859'     | -0.87694 +/- 4.5616' | 0.2857142857 |
| O1 Theta        | -2.7495 +/- 17.1427'  | -4.4477 +/- 12.5136' | 0.1111111111 |
| O1 Alpha        | -2.0957 +/- 13.9568'  | -3.2576 +/- 9.8101'  | 0.1111111111 |
| O1 Beta         | -1.226 +/- 9.5359'    | -2.4238 +/- 7.511'   | 0.1111111111 |
| O1 Delta        | -3.1572 +/- 18.874'   | -6.4055 +/- 15.8787' | 0.1111111111 |
| O1 Gamma        | 1.084 +/- 1.2943'     | 1.0067 +/- 0.37125'  | 1            |
| O1 Overall      | 1.353 +/- 4.6689'     | -3.0215 +/- 4.7714'  | 1            |
| R hemi Theta    | -16.7244 +/- 53.0667' | 0.70404 +/- 9.1051'  | 0.9047619048 |
| R hemi Alpha    | -14.6311 +/- 46.6077' | 0.6322 +/- 6.8814'   | 0.9047619048 |
| R hemi Beta     | -7.2112 +/- 24.3645'  | 0.30059 +/- 5.3654'  | 0.9047619048 |
| R hemi Delta    | -18.0279 +/- 59.2178' | 0.48182 +/- 11.7749' | 0.7301587302 |
| R hemi Gamma    | 5.0982 +/- 12.4531'   | 0.96284 +/- 0.4775'  | 0.1111111111 |
| R hemi Overall  | 0.83584 +/- 5.2025'   | -2.3478 +/- 4.093'   | 0.7301587302 |
| L hemi Theta    | 5.317 +/- 16.0133'    | -2.0402 +/- 9.5772'  | 0.2857142857 |
| L hemi Alpha    | 4.1268 +/- 12.4357'   | -1.1244 +/- 7.1953'  | 0.2857142857 |
| L hemi Beta     | 3.6414 +/- 8.6745'    | -0.75354 +/- 5.8077' | 0.2857142857 |
| L hemi Delta    | 6.4374 +/- 19.631'    | -3.616 +/- 13.4631'  | 0.4126984127 |
| L hemi Gamma    | 0.98516 +/- 1.7924'   | 0.99295 +/- 0.65462' | 0.5555555556 |
| L hemi Overall  | 1.1037 +/- 4.0083'    | -2.194 +/- 4.1027'   | 0.4126984127 |
| Overall Theta   | -5.7037 +/- 28.2429'  | -0.66814 +/- 5.6427' | 0.1904761905 |
| Overall Alpha   | -5.2521 +/- 24.6106'  | -0.24609 +/- 4.183'  | 0.1904761905 |
| Overall Beta    | -1.7849 +/- 13.3215'  | -0.22646 +/- 3.1596' | 0.1111111111 |
| Overall Delta   | -5.7954 +/- 31.7381'  | -1.5671 +/- 8.115'   | 0.2857142857 |
| Overall Gamma   | 3.0417 +/- 6.3182'    | 0.97789 +/- 0.45065' | 0.5555555556 |
| Overall Overall | 0.96979 +/- 4.4172'   | -2.2709 +/- 4.0148'  | 0.7301587302 |

**Table S2.** Hemispheric asymmetry, overall and within each band, untreated vs. treated at baseline.

| <b>Band</b>      | <b>Treated</b>        | <b>Untreated</b>      | <b><i>p</i></b> |
|------------------|-----------------------|-----------------------|-----------------|
| Frontal Theta    | 41.0888 +/- 137.9382' | 5.8608 +/- 21.203'    | 0.9047619048    |
| Frontal Alpha    | 36.2265 +/- 121.5779' | 4.9675 +/- 16.5359'   | 0.9047619048    |
| Frontal Beta     | 16.7993 +/- 60.2644'  | 4.9543 +/- 14.8929'   | 0.9047619048    |
| Frontal Delta    | 44.0713 +/- 152.0418' | 7.6225 +/- 28.7263'   | 0.7301587302    |
| Frontal Gamma    | -10.9776 +/- 32.5008' | 0.86421 +/- 2.1103'   | 0.7301587302    |
| Frontal Overall  | 0.17714 +/- 2.2727'   | 0.57149 +/- 2.4073'   | 1               |
| Parietal Theta   | 14.8442 +/- 59.4537'  | -15.2109 +/- 36.0135' | 0.7301587302    |
| Parietal Alpha   | 12.957 +/- 48.2804'   | -11.5209 +/- 27.2849' | 0.5555555556    |
| Parietal Beta    | 9.8882 +/- 30.8952'   | -9.8781 +/- 22.7982'  | 0.7301587302    |
| Parietal Delta   | 15.0364 +/- 72.5403'  | -22.7124 +/- 49.1711' | 0.7301587302    |
| Parietal Gamma   | -1.1309 +/- 11.8212'  | -0.83442 +/- 1.4105'  | 0.9047619048    |
| Parietal Overall | 0.39547 +/- 3.4069'   | 0.8676 +/- 2.445'     | 0.4126984127    |
| Temporal Theta   | 21.7736 +/- 57.8009'  | 6.8296 +/- 16.1171'   | 0.2857142857    |
| Temporal Alpha   | 17.1863 +/- 45.0771'  | 5.9183 +/- 13.4189'   | 0.2857142857    |

|                   |                       |                       |              |
|-------------------|-----------------------|-----------------------|--------------|
| Temporal Beta     | 11.5654 +/- 30.2151'  | 5.5281 +/- 12.6068'   | 0.2857142857 |
| Temporal Delta    | 26.5389 +/- 72.192'   | 9.7977 +/- 23.7658'   | 0.2857142857 |
| Temporal Gamma    | -2.3044 +/- 6.4987'   | 0.023562 +/- 0.53226' | 1            |
| Temporal Overall  | 0.32091 +/- 4.4997'   | -0.33404 +/- 2.4852'  | 0.4126984127 |
| Occipital Theta   | 10.4573 +/- 23.8274'  | -8.4563 +/- 17.5338'  | 0.9047619048 |
| Occipital Alpha   | 8.6597 +/- 20.5463'   | -6.3909 +/- 13.3715'  | 1            |
| Occipital Beta    | 5.1574 +/- 11.471'    | -4.821 +/- 10.1408'   | 0.7301587302 |
| Occipital Delta   | 12.2173 +/- 26.5856'  | -11.0994 +/- 22.6268' | 0.9047619048 |
| Occipital Gamma   | -2.0393 +/- 5.6575'   | 0.067086 +/- 0.3357'  | 0.9047619048 |
| Occipital Overall | 0.17781 +/- 3.3702'   | -0.48964 +/- 2.4748'  | 0.7301587302 |
| Overall Theta     | 88.1648 +/- 217.4111' | -10.9771 +/- 59.585'  | 0.5555555556 |
| Overall Alpha     | 75.0309 +/- 188.9366' | -7.026 +/- 45.3005'   | 0.5555555556 |
| Overall Beta      | 43.4108 +/- 100.2333' | -4.2166 +/- 36.9007'  | 0.5555555556 |
| Overall Delta     | 97.8631 +/- 245.1246' | -16.3921 +/- 77.6038' | 0.5555555556 |
| Overall Gamma     | -16.4525 +/- 50.1066' | 0.12043 +/- 2.8304'   | 0.2857142857 |
| Overall Overall   | 1.0714 +/- 11.4666'   | 0.61544 +/- 6.5684'   | 0.9047619048 |

**Table S3.** Inter-electrode coherence measures in the overall spectrum, untreated vs. treated at baseline.

| <b>Band</b>   | <b>Treated</b>       | <b>Untreated</b>     | <b><i>p</i></b> |
|---------------|----------------------|----------------------|-----------------|
| Fp2-C4 Theta  | 0.39488 +/- 0.19929' | 0.27081 +/- 0.13146' | 0.5555555556    |
| Fp2-O2 Theta  | 0.43856 +/- 0.11658' | 0.2562 +/- 0.11246'  | 0.7301587302    |
| Fp2-T4 Theta  | 0.3787 +/- 0.15994'  | 0.21967 +/- 0.10383' | 0.7301587302    |
| Fp2-Fp1 Theta | 0.46204 +/- 0.16753' | 0.32464 +/- 0.21667' | 0.5555555556    |
| Fp2-C3 Theta  | 0.34263 +/- 0.14834' | 0.22099 +/- 0.11575' | 0.9047619048    |
| Fp2-T3 Theta  | 0.37034 +/- 0.15419' | 0.22343 +/- 0.11094' | 0.4126984127    |
| Fp2-O1 Theta  | 0.35844 +/- 0.13733' | 0.22965 +/- 0.11807' | 0.2857142857    |
| C4-O2 Theta   | 0.38617 +/- 0.22401' | 0.24777 +/- 0.16256' | 0.9047619048    |
| C4-T4 Theta   | 0.47847 +/- 0.28006' | 0.36583 +/- 0.27638' | 0.5555555556    |
| C4-Fp1 Theta  | 0.37821 +/- 0.17156' | 0.22879 +/- 0.20095' | 0.03174603175   |
| C4-C3 Theta   | 0.37856 +/- 0.1808'  | 0.26036 +/- 0.22457' | 0.4126984127    |
| C4-T3 Theta   | 0.3059 +/- 0.12841'  | 0.24425 +/- 0.23585' | 0.9047619048    |
| C4-O1 Theta   | 0.31504 +/- 0.12947' | 0.23397 +/- 0.24084' | 0.2857142857    |
| O2-T4 Theta   | 0.52955 +/- 0.27429' | 0.48706 +/- 0.28564' | 0.4126984127    |
| O2-Fp1 Theta  | 0.39486 +/- 0.14794' | 0.23392 +/- 0.17623' | 0.7301587302    |
| O2-C3 Theta   | 0.35104 +/- 0.17727' | 0.25166 +/- 0.23694' | 0.9047619048    |
| O2-T3 Theta   | 0.33102 +/- 0.15356' | 0.25506 +/- 0.2'     | 0.7301587302    |
| O2-O1 Theta   | 0.3838 +/- 0.14064'  | 0.29043 +/- 0.21475' | 1               |
| T4-Fp1 Theta  | 0.37197 +/- 0.15796' | 0.21943 +/- 0.20157' | 0.1904761905    |
| T4-C3 Theta   | 0.33391 +/- 0.14912' | 0.24151 +/- 0.24867' | 0.4126984127    |
| T4-T3 Theta   | 0.34288 +/- 0.1397'  | 0.25456 +/- 0.25251' | 0.9047619048    |
| T4-O1 Theta   | 0.33074 +/- 0.15777' | 0.23896 +/- 0.24031' | 0.9047619048    |
| Fp1-C3 Theta  | 0.46992 +/- 0.20448' | 0.40263 +/- 0.23171' | 1               |



|               |                      |                      |               |
|---------------|----------------------|----------------------|---------------|
| Fp1-T3 Theta  | 0.41061 +/- 0.19929' | 0.30963 +/- 0.18596' | 0.2857142857  |
| Fp1-O1 Theta  | 0.45349 +/- 0.16876' | 0.35818 +/- 0.18605' | 0.7301587302  |
| C3-T3 Theta   | 0.3873 +/- 0.24969'  | 0.41834 +/- 0.24009' | 0.06349206349 |
| C3-O1 Theta   | 0.37202 +/- 0.16157' | 0.35346 +/- 0.23653' | 0.9047619048  |
| T3-O1 Theta   | 0.56078 +/- 0.20873' | 0.39065 +/- 0.2298'  | 0.5555555556  |
| Fp2-C4 Alpha  | 0.36294 +/- 0.16378' | 0.30604 +/- 0.1634'  | 0.5555555556  |
| Fp2-O2 Alpha  | 0.39244 +/- 0.13891' | 0.31621 +/- 0.15267' | 0.7301587302  |
| Fp2-T4 Alpha  | 0.33948 +/- 0.11008' | 0.26776 +/- 0.15927' | 0.9047619048  |
| Fp2-Fp1 Alpha | 0.45438 +/- 0.18'    | 0.36291 +/- 0.19476' | 0.5555555556  |
| Fp2-C3 Alpha  | 0.3905 +/- 0.14723'  | 0.26308 +/- 0.17089' | 0.7301587302  |
| Fp2-T3 Alpha  | 0.3966 +/- 0.16994'  | 0.26215 +/- 0.17566' | 0.4126984127  |
| Fp2-O1 Alpha  | 0.37884 +/- 0.16095' | 0.25868 +/- 0.17987' | 0.2857142857  |
| C4-O2 Alpha   | 0.36323 +/- 0.18056' | 0.28159 +/- 0.20222' | 0.9047619048  |
| C4-T4 Alpha   | 0.42842 +/- 0.26768' | 0.39223 +/- 0.25501' | 1             |
| C4-Fp1 Alpha  | 0.38936 +/- 0.1364'  | 0.26002 +/- 0.23575' | 0.5555555556  |
| C4-C3 Alpha   | 0.40439 +/- 0.15915' | 0.29576 +/- 0.24432' | 0.4126984127  |
| C4-T3 Alpha   | 0.32015 +/- 0.152'   | 0.25324 +/- 0.24129' | 0.9047619048  |
| C4-O1 Alpha   | 0.3411 +/- 0.15067'  | 0.24384 +/- 0.25411' | 0.7301587302  |
| O2-T4 Alpha   | 0.4869 +/- 0.2249'   | 0.43358 +/- 0.29428' | 0.9047619048  |
| O2-Fp1 Alpha  | 0.41211 +/- 0.13224' | 0.28589 +/- 0.21357' | 0.7301587302  |
| O2-C3 Alpha   | 0.40199 +/- 0.15325' | 0.28256 +/- 0.24391' | 0.7301587302  |
| O2-T3 Alpha   | 0.35822 +/- 0.15412' | 0.26456 +/- 0.2127'  | 0.7301587302  |
| O2-O1 Alpha   | 0.44852 +/- 0.13407' | 0.3124 +/- 0.23773'  | 0.9047619048  |
| T4-Fp1 Alpha  | 0.36959 +/- 0.13917' | 0.26505 +/- 0.24066' | 1             |
| T4-C3 Alpha   | 0.34685 +/- 0.10509' | 0.2505 +/- 0.25472'  | 0.2857142857  |
| T4-T3 Alpha   | 0.33789 +/- 0.13989' | 0.25983 +/- 0.25129' | 0.9047619048  |
| T4-O1 Alpha   | 0.34458 +/- 0.13552' | 0.24715 +/- 0.23395' | 0.9047619048  |
| Fp1-C3 Alpha  | 0.52185 +/- 0.14435' | 0.36035 +/- 0.24447' | 0.7301587302  |
| Fp1-T3 Alpha  | 0.44769 +/- 0.20491' | 0.30951 +/- 0.22575' | 0.1904761905  |
| Fp1-O1 Alpha  | 0.55033 +/- 0.19656' | 0.34291 +/- 0.23205' | 0.9047619048  |
| C3-T3 Alpha   | 0.39806 +/- 0.27138' | 0.44316 +/- 0.20254' | 0.5555555556  |
| C3-O1 Alpha   | 0.46125 +/- 0.14901' | 0.33634 +/- 0.25694' | 0.7301587302  |
| T3-O1 Alpha   | 0.54853 +/- 0.21676' | 0.42092 +/- 0.24519' | 0.9047619048  |
| Fp2-C4 Beta   | 0.39884 +/- 0.16502' | 0.3003 +/- 0.15513'  | 0.9047619048  |
| Fp2-O2 Beta   | 0.41875 +/- 0.15661' | 0.3244 +/- 0.17342'  | 0.9047619048  |
| Fp2-T4 Beta   | 0.31545 +/- 0.10425' | 0.27461 +/- 0.18194' | 0.1904761905  |
| Fp2-Fp1 Beta  | 0.41227 +/- 0.15275' | 0.34777 +/- 0.23594' | 0.9047619048  |
| Fp2-C3 Beta   | 0.37481 +/- 0.15004' | 0.25122 +/- 0.1555'  | 0.9047619048  |
| Fp2-T3 Beta   | 0.34644 +/- 0.15193' | 0.2361 +/- 0.16127'  | 1             |
| Fp2-O1 Beta   | 0.37369 +/- 0.15999' | 0.23949 +/- 0.16607' | 1             |
| C4-O2 Beta    | 0.35361 +/- 0.15575' | 0.31047 +/- 0.19734' | 1             |
| C4-T4 Beta    | 0.4194 +/- 0.25351'  | 0.42289 +/- 0.23603' | 0.9047619048  |
| C4-Fp1 Beta   | 0.36532 +/- 0.1396'  | 0.24778 +/- 0.2208'  | 0.7301587302  |

|               |                       |                       |              |
|---------------|-----------------------|-----------------------|--------------|
| C4-C3 Beta    | 0.39957 +/- 0.15548'  | 0.28995 +/- 0.22747'  | 0.5555555556 |
| C4-T3 Beta    | 0.29162 +/- 0.11246'  | 0.23729 +/- 0.22478'  | 0.7301587302 |
| C4-O1 Beta    | 0.32332 +/- 0.11309'  | 0.23973 +/- 0.23961'  | 1            |
| O2-T4 Beta    | 0.46368 +/- 0.21275'  | 0.39607 +/- 0.29202'  | 0.9047619048 |
| O2-Fp1 Beta   | 0.4436 +/- 0.13561'   | 0.31543 +/- 0.21805'  | 1            |
| O2-C3 Beta    | 0.41894 +/- 0.14467'  | 0.30244 +/- 0.22779'  | 0.7301587302 |
| O2-T3 Beta    | 0.36537 +/- 0.11986'  | 0.26022 +/- 0.1949'   | 0.7301587302 |
| O2-O1 Beta    | 0.48129 +/- 0.16853'  | 0.32854 +/- 0.24132'  | 0.9047619048 |
| T4-Fp1 Beta   | 0.38297 +/- 0.17006'  | 0.27069 +/- 0.23652'  | 0.4126984127 |
| T4-C3 Beta    | 0.33485 +/- 0.11546'  | 0.24353 +/- 0.23416'  | 0.4126984127 |
| T4-T3 Beta    | 0.34829 +/- 0.14201'  | 0.25883 +/- 0.23453'  | 0.5555555556 |
| T4-O1 Beta    | 0.3633 +/- 0.16246'   | 0.24362 +/- 0.21351'  | 0.4126984127 |
| Fp1-C3 Beta   | 0.53148 +/- 0.19572'  | 0.30873 +/- 0.23812'  | 0.2857142857 |
| Fp1-T3 Beta   | 0.4125 +/- 0.18844'   | 0.26898 +/- 0.20735'  | 0.1904761905 |
| Fp1-O1 Beta   | 0.60532 +/- 0.18987'  | 0.29022 +/- 0.22298'  | 1            |
| C3-T3 Beta    | 0.36811 +/- 0.25124'  | 0.42704 +/- 0.23481'  | 0.1111111111 |
| C3-O1 Beta    | 0.49044 +/- 0.19706'  | 0.33661 +/- 0.27029'  | 0.9047619048 |
| T3-O1 Beta    | 0.48776 +/- 0.20844'  | 0.44111 +/- 0.27799'  | 0.9047619048 |
| Fp2-C4 Delta  | 0.38658 +/- 0.20659'  | 0.25384 +/- 0.10911'  | 0.4126984127 |
| Fp2-O2 Delta  | 0.35762 +/- 0.11589'  | 0.22134 +/- 0.063843' | 0.7301587302 |
| Fp2-T4 Delta  | 0.3575 +/- 0.1671'    | 0.20871 +/- 0.081154' | 0.5555555556 |
| Fp2-Fp1 Delta | 0.37929 +/- 0.15468'  | 0.33567 +/- 0.21601'  | 0.5555555556 |
| Fp2-C3 Delta  | 0.32077 +/- 0.098154' | 0.19466 +/- 0.069298' | 0.4126984127 |
| Fp2-T3 Delta  | 0.3494 +/- 0.11964'   | 0.19499 +/- 0.068755' | 0.1904761905 |
| Fp2-O1 Delta  | 0.32954 +/- 0.10037'  | 0.21736 +/- 0.070945' | 0.4126984127 |
| C4-O2 Delta   | 0.31018 +/- 0.18546'  | 0.27375 +/- 0.198'    | 0.9047619048 |
| C4-T4 Delta   | 0.49648 +/- 0.26963'  | 0.38064 +/- 0.27231'  | 0.1904761905 |
| C4-Fp1 Delta  | 0.32161 +/- 0.14282'  | 0.25119 +/- 0.18678'  | 0.5555555556 |
| C4-C3 Delta   | 0.3273 +/- 0.10663'   | 0.27845 +/- 0.24598'  | 0.4126984127 |
| C4-T3 Delta   | 0.27787 +/- 0.097859' | 0.25597 +/- 0.24111'  | 0.4126984127 |
| C4-O1 Delta   | 0.27945 +/- 0.090114' | 0.24757 +/- 0.24862'  | 0.5555555556 |
| O2-T4 Delta   | 0.49744 +/- 0.27169'  | 0.49469 +/- 0.26824'  | 1            |
| O2-Fp1 Delta  | 0.29066 +/- 0.13282'  | 0.25313 +/- 0.14974'  | 1            |
| O2-C3 Delta   | 0.29857 +/- 0.11478'  | 0.25584 +/- 0.23974'  | 0.7301587302 |
| O2-T3 Delta   | 0.26809 +/- 0.10749'  | 0.26421 +/- 0.21681'  | 0.5555555556 |
| O2-O1 Delta   | 0.31934 +/- 0.12508'  | 0.30735 +/- 0.21853'  | 0.7301587302 |
| T4-Fp1 Delta  | 0.29179 +/- 0.11469'  | 0.23313 +/- 0.16714'  | 0.4126984127 |
| T4-C3 Delta   | 0.28371 +/- 0.10929'  | 0.24692 +/- 0.24394'  | 0.5555555556 |
| T4-T3 Delta   | 0.29063 +/- 0.091744' | 0.2704 +/- 0.23163'   | 0.9047619048 |
| T4-O1 Delta   | 0.27892 +/- 0.11494'  | 0.24945 +/- 0.2363'   | 0.4126984127 |
| Fp1-C3 Delta  | 0.4286 +/- 0.19024'   | 0.39746 +/- 0.20359'  | 0.5555555556 |
| Fp1-T3 Delta  | 0.35673 +/- 0.14212'  | 0.28757 +/- 0.16172'  | 0.2857142857 |
| Fp1-O1 Delta  | 0.40079 +/- 0.12875'  | 0.33271 +/- 0.17065'  | 1            |

|                 |                       |                      |               |
|-----------------|-----------------------|----------------------|---------------|
| C3-T3 Delta     | 0.3742 +/- 0.25903'   | 0.39404 +/- 0.24395' | 0.2857142857  |
| C3-O1 Delta     | 0.35831 +/- 0.13268'  | 0.38998 +/- 0.26474' | 0.9047619048  |
| T3-O1 Delta     | 0.48392 +/- 0.1947'   | 0.39759 +/- 0.23761' | 0.7301587302  |
| Fp2-C4 Gamma    | 0.44381 +/- 0.21927'  | 0.29701 +/- 0.14952' | 0.2857142857  |
| Fp2-O2 Gamma    | 0.42621 +/- 0.18964'  | 0.30599 +/- 0.18219' | 0.9047619048  |
| Fp2-T4 Gamma    | 0.3143 +/- 0.13286'   | 0.26523 +/- 0.18757' | 0.7301587302  |
| Fp2-Fp1 Gamma   | 0.38161 +/- 0.18441'  | 0.31348 +/- 0.23787' | 0.7301587302  |
| Fp2-C3 Gamma    | 0.393 +/- 0.17849'    | 0.24117 +/- 0.16529' | 1             |
| Fp2-T3 Gamma    | 0.34346 +/- 0.20277'  | 0.20881 +/- 0.14586' | 0.9047619048  |
| Fp2-O1 Gamma    | 0.3382 +/- 0.18652'   | 0.23032 +/- 0.14994' | 1             |
| C4-O2 Gamma     | 0.35171 +/- 0.1409'   | 0.32693 +/- 0.20578' | 0.9047619048  |
| C4-T4 Gamma     | 0.40289 +/- 0.25446'  | 0.47014 +/- 0.25557' | 0.7301587302  |
| C4-Fp1 Gamma    | 0.31622 +/- 0.15506'  | 0.25291 +/- 0.20727' | 0.5555555556  |
| C4-C3 Gamma     | 0.36325 +/- 0.13675'  | 0.29807 +/- 0.22248' | 0.9047619048  |
| C4-T3 Gamma     | 0.28422 +/- 0.11551'  | 0.23451 +/- 0.20803' | 0.7301587302  |
| C4-O1 Gamma     | 0.28338 +/- 0.12576'  | 0.27034 +/- 0.22834' | 0.5555555556  |
| O2-T4 Gamma     | 0.46823 +/- 0.21849'  | 0.37653 +/- 0.29106' | 0.9047619048  |
| O2-Fp1 Gamma    | 0.39842 +/- 0.13399'  | 0.29704 +/- 0.21436' | 0.7301587302  |
| O2-C3 Gamma     | 0.42637 +/- 0.14948'  | 0.2937 +/- 0.22059'  | 1             |
| O2-T3 Gamma     | 0.38408 +/- 0.17961'  | 0.24197 +/- 0.18273' | 1             |
| O2-O1 Gamma     | 0.45333 +/- 0.19057'  | 0.3526 +/- 0.22675'  | 0.2857142857  |
| T4-Fp1 Gamma    | 0.34652 +/- 0.1068'   | 0.26349 +/- 0.22198' | 0.4126984127  |
| T4-C3 Gamma     | 0.33107 +/- 0.085006' | 0.24723 +/- 0.22796' | 0.4126984127  |
| T4-T3 Gamma     | 0.37 +/- 0.13339'     | 0.25569 +/- 0.2226'  | 0.4126984127  |
| T4-O1 Gamma     | 0.3347 +/- 0.11965'   | 0.2546 +/- 0.19428'  | 0.5555555556  |
| Fp1-C3 Gamma    | 0.50211 +/- 0.20083'  | 0.27814 +/- 0.19572' | 0.1111111111  |
| Fp1-T3 Gamma    | 0.37815 +/- 0.20485'  | 0.23976 +/- 0.18735' | 0.2857142857  |
| Fp1-O1 Gamma    | 0.47778 +/- 0.16781'  | 0.2709 +/- 0.19947'  | 1             |
| C3-T3 Gamma     | 0.44613 +/- 0.27008'  | 0.45628 +/- 0.26072' | 0.06349206349 |
| C3-O1 Gamma     | 0.44283 +/- 0.16621'  | 0.37106 +/- 0.23455' | 1             |
| T3-O1 Gamma     | 0.46218 +/- 0.20809'  | 0.40525 +/- 0.18309' | 0.7301587302  |
| Fp2-C4 Overall  | 0.40873 +/- 0.1817'   | 0.32037 +/- 0.13853' | 0.2857142857  |
| Fp2-O2 Overall  | 0.40186 +/- 0.11018'  | 0.3057 +/- 0.14717'  | 0.9047619048  |
| Fp2-T4 Overall  | 0.31385 +/- 0.095162' | 0.28277 +/- 0.17061' | 0.5555555556  |
| Fp2-Fp1 Overall | 0.41377 +/- 0.10126'  | 0.34569 +/- 0.19498' | 0.5555555556  |
| Fp2-C3 Overall  | 0.37304 +/- 0.11035'  | 0.26211 +/- 0.15499' | 0.5555555556  |
| Fp2-T3 Overall  | 0.36194 +/- 0.14128'  | 0.24555 +/- 0.12504' | 1             |
| Fp2-O1 Overall  | 0.35476 +/- 0.11247'  | 0.25406 +/- 0.12752' | 1             |
| C4-O2 Overall   | 0.34112 +/- 0.1397'   | 0.33461 +/- 0.1799'  | 0.9047619048  |
| C4-T4 Overall   | 0.43081 +/- 0.25955'  | 0.44938 +/- 0.20759' | 0.5555555556  |
| C4-Fp1 Overall  | 0.33701 +/- 0.11294'  | 0.28808 +/- 0.19071' | 0.9047619048  |
| C4-C3 Overall   | 0.37598 +/- 0.13841'  | 0.33706 +/- 0.22075' | 0.9047619048  |
| C4-T3 Overall   | 0.30556 +/- 0.10446'  | 0.28804 +/- 0.20593' | 1             |

|                |                       |                      |               |
|----------------|-----------------------|----------------------|---------------|
| C4-O1 Overall  | 0.29068 +/- 0.10042'  | 0.30301 +/- 0.21602' | 1             |
| O2-T4 Overall  | 0.47982 +/- 0.20184'  | 0.44992 +/- 0.25961' | 0.7301587302  |
| O2-Fp1 Overall | 0.40458 +/- 0.11861'  | 0.3215 +/- 0.20927'  | 0.5555555556  |
| O2-C3 Overall  | 0.40377 +/- 0.12793'  | 0.32003 +/- 0.22882' | 0.4126984127  |
| O2-T3 Overall  | 0.37888 +/- 0.1255'   | 0.28861 +/- 0.18524' | 0.5555555556  |
| O2-O1 Overall  | 0.46893 +/- 0.16667'  | 0.37464 +/- 0.22163' | 0.9047619048  |
| T4-Fp1 Overall | 0.3335 +/- 0.11186'   | 0.29601 +/- 0.22197' | 0.1904761905  |
| T4-C3 Overall  | 0.33531 +/- 0.10693'  | 0.27987 +/- 0.25224' | 0.1904761905  |
| T4-T3 Overall  | 0.35537 +/- 0.12808'  | 0.29054 +/- 0.22619' | 0.7301587302  |
| T4-O1 Overall  | 0.34664 +/- 0.095155' | 0.28004 +/- 0.19697' | 0.9047619048  |
| Fp1-C3 Overall | 0.49978 +/- 0.18802'  | 0.36781 +/- 0.18441' | 0.1904761905  |
| Fp1-T3 Overall | 0.38379 +/- 0.13499'  | 0.2958 +/- 0.18691'  | 0.2857142857  |
| Fp1-O1 Overall | 0.47094 +/- 0.13709'  | 0.33653 +/- 0.19107' | 0.7301587302  |
| C3-T3 Overall  | 0.45252 +/- 0.2586'   | 0.49174 +/- 0.19806' | 0.06349206349 |
| C3-O1 Overall  | 0.43662 +/- 0.15782'  | 0.40603 +/- 0.20104' | 0.9047619048  |
| T3-O1 Overall  | 0.48316 +/- 0.17354'  | 0.44955 +/- 0.15809' | 0.7301587302  |

**Table S4.** Overall power and power within each band at each electrode location, treated vs. untreated at 12 months.

| <b>Band</b> | <b>Treated</b>       | <b>Untreated</b>       | <b><i>p</i></b> |
|-------------|----------------------|------------------------|-----------------|
| Fp2 Theta   | 4.346 +/- 11.2209'   | -4.5294 +/- 4.7287'    | 0.2224187577    |
| Fp2 Alpha   | 3.5206 +/- 8.4127'   | -3.0898 +/- 3.2086'    | 0.2224187577    |
| Fp2 Beta    | 2.8459 +/- 5.7358'   | -2.3148 +/- 2.8251'    | 0.03146853147   |
| Fp2 Delta   | 5.0624 +/- 13.4924'  | -6.321 +/- 6.182'      | 0.09391197038   |
| Fp2 Gamma   | 1.1447 +/- 0.73124'  | 0.97169 +/- 0.34955'   | 0.1902509255    |
| Fp2 Overall | -1.5346 +/- 4.561'   | -4.604 +/- 1.9025'     | 0.2224187577    |
| C4 Theta    | 3.7585 +/- 11.2755'  | -12.6099 +/- 14.725'   | 0.03146853147   |
| C4 Alpha    | 3.1006 +/- 8.5459'   | -9.3185 +/- 11.1534'   | 0.03146853147   |
| C4 Beta     | 2.0937 +/- 5.7793'   | -8.5623 +/- 10.4676'   | 0.02443438914   |
| C4 Delta    | 4.2109 +/- 13.4868'  | -17.2557 +/- 20.5873'  | 0.03998354587   |
| C4 Gamma    | 0.82813 +/- 0.93321' | -0.42995 +/- 2.0711'   | 0.11349239      |
| C4 Overall  | 0.27311 +/- 5.4459'  | -3.9997 +/- 3.5107'    | 0.09391197038   |
| T4 Theta    | 0.8291 +/- 8.1605'   | 109.694 +/- 315.0896'  | 0.7304401481    |
| T4 Alpha    | 0.74567 +/- 6.4396'  | 94.4001 +/- 273.0846'  | 0.7304401481    |
| T4 Beta     | 0.67549 +/- 5.1402'  | 93.7959 +/- 270.4052'  | 0.7961744138    |
| T4 Delta    | 0.76267 +/- 9.902'   | 114.8333 +/- 324.1421' | 0.7304401481    |
| T4 Gamma    | 0.9266 +/- 0.52462'  | 18.8093 +/- 51.5697'   | 0.2973262032    |
| T4 Overall  | 0.20284 +/- 5.7367'  | -2.0923 +/- 3.254'     | 0.2580830934    |
| O2 Theta    | 1.2135 +/- 19.7864'  | -41.3183 +/- 107.6733' | 0.09391197038   |
| O2 Alpha    | 0.96673 +/- 15.307'  | -29.2041 +/- 75.0885'  | 0.11349239      |
| O2 Beta     | 0.67809 +/- 11.4798' | -25.2616 +/- 66.1963'  | 0.09391197038   |
| O2 Delta    | 1.3924 +/- 21.7912'  | -51.6634 +/- 135.8023' | 0.11349239      |
| O2 Gamma    | 1.0434 +/- 0.24661'  | -0.40508 +/- 3.6966'   | 0.9314273961    |

|                 |                       |                      |                |
|-----------------|-----------------------|----------------------|----------------|
| O2 Overall      | -0.93669 +/- 5.6042'  | -4.2626 +/- 3.1'     | 0.1359111477   |
| Fp1 Theta       | -5.6436 +/- 14.5087'  | -2.8628 +/- 1.7287'  | 0.2973262032   |
| Fp1 Alpha       | -4.0319 +/- 10.8357'  | -1.8982 +/- 1.2077'  | 0.1614973262   |
| Fp1 Beta        | -2.2663 +/- 7.8564'   | -1.2907 +/- 1.0829'  | 0.2973262032   |
| Fp1 Delta       | -6.6069 +/- 17.7835'  | -3.9248 +/- 2.417'   | 0.2580830934   |
| Fp1 Gamma       | 1.3564 +/- 0.39207'   | 1.0446 +/- 0.16285'  | 0.09391197038  |
| Fp1 Overall     | -2.0483 +/- 2.7908'   | -5.8652 +/- 2.1439'  | 0.007774578363 |
| C3 Theta        | -1.5415 +/- 15.1929'  | 5.1215 +/- 21.1862'  | 0.6664747018   |
| C3 Alpha        | -0.93597 +/- 11.5032' | 3.8199 +/- 15.3817'  | 0.7304401481   |
| C3 Beta         | -0.15355 +/- 8.3969'  | 4.0642 +/- 15.2576'  | 0.6664747018   |
| C3 Delta        | -1.6323 +/- 17.5461'  | 4.5737 +/- 22.6244'  | 0.6664747018   |
| C3 Gamma        | 1.6898 +/- 0.6791'    | 2.5605 +/- 4.9571'   | 0.06252570958  |
| C3 Overall      | 0.34711 +/- 4.9042'   | -4.0909 +/- 4.3529'  | 0.09391197038  |
| T3 Theta        | 4.6367 +/- 12.0363'   | 3.8169 +/- 10.7411'  | 0.6664747018   |
| T3 Alpha        | 3.7768 +/- 9.1438'    | 3.0475 +/- 8.3598'   | 0.7304401481   |
| T3 Beta         | 3.6211 +/- 7.2616'    | 3.4279 +/- 9.124'    | 0.5457013575   |
| T3 Delta        | 5.3024 +/- 14.2394'   | 5.6136 +/- 15.966'   | 0.6048128342   |
| T3 Gamma        | 1.6364 +/- 0.46674'   | 1.6016 +/- 1.3299'   | 0.2973262032   |
| T3 Overall      | 1.909 +/- 6.9675'     | -1.6894 +/- 4.1151'  | 0.38650761     |
| O1 Theta        | 0.65271 +/- 28.8086'  | -3.0936 +/- 6.9851'  | 0.4362813657   |
| O1 Alpha        | 0.64892 +/- 21.4488'  | -2.0775 +/- 5.319'   | 0.5457013575   |
| O1 Beta         | 0.97378 +/- 16.1414'  | -1.3274 +/- 4.3119'  | 0.4362813657   |
| O1 Delta        | 0.21728 +/- 35.0435'  | -4.4437 +/- 8.4833'  | 0.4894282188   |
| O1 Gamma        | 1.6256 +/- 1.0923'    | 0.92084 +/- 0.41037' | 0.03998354587  |
| O1 Overall      | 0.044024 +/- 6.3288'  | -4.0077 +/- 3.1238'  | 0.1614973262   |
| R hemi Theta    | 2.5368 +/- 7.5549'    | 12.8093 +/- 85.5026' | 0.05030851501  |
| R hemi Alpha    | 2.0833 +/- 5.6825'    | 13.1967 +/- 72.1623' | 0.05030851501  |
| R hemi Beta     | 1.5733 +/- 4.2176'    | 14.4142 +/- 70.5478' | 0.06252570958  |
| R hemi Delta    | 2.8571 +/- 8.8378'    | 9.8981 +/- 91.0119'  | 0.05030851501  |
| R hemi Gamma    | 0.98572 +/- 0.47304'  | 4.7365 +/- 12.6305'  | 0.4894282188   |
| R hemi Overall  | -0.4988 +/- 4.7612'   | -3.7396 +/- 2.5473'  | 0.09391197038  |
| L hemi Theta    | -0.4739 +/- 8.4564'   | 0.74554 +/- 7.1952'  | 0.863307281    |
| L hemi Alpha    | -0.13556 +/- 6.4339'  | 0.72299 +/- 5.3994'  | 0.9314273961   |
| L hemi Beta     | 0.54377 +/- 4.7383'   | 1.2185 +/- 5.1383'   | 0.7304401481   |
| L hemi Delta    | -0.67983 +/- 10.201'  | 0.4547 +/- 7.9624'   | 0.7304401481   |
| L hemi Gamma    | 1.5771 +/- 0.35924'   | 1.5319 +/- 1.2919'   | 0.07700534759  |
| L hemi Overall  | 0.062953 +/- 5.0083'  | -3.9133 +/- 2.9704'  | 0.09391197038  |
| Overall Theta   | 1.0314 +/- 5.9443'    | 6.7769 +/- 46.0782'  | 0.3401069519   |
| Overall Alpha   | 0.97391 +/- 4.5747'   | 6.9598 +/- 38.5928'  | 0.38650761     |
| Overall Beta    | 1.0585 +/- 3.4403'    | 7.8161 +/- 37.6269'  | 0.2973262032   |
| Overall Delta   | 1.0886 +/- 6.8119'    | 5.1762 +/- 49.0286'  | 0.2580830934   |
| Overall Gamma   | 1.2814 +/- 0.28797'   | 3.1342 +/- 6.9404'   | 0.07700534759  |
| Overall Overall | -0.21794 +/- 4.709'   | -3.8265 +/- 2.7047'  | 0.06252570958  |

**Table S5.** Hemispheric asymmetry, overall and within each band, untreated vs. treated at 12 months.

| <b>Band</b>       | <b>Treated</b>        | <b>Untreated</b>        | <b><i>p</i></b> |
|-------------------|-----------------------|-------------------------|-----------------|
| Frontal Theta     | -9.9898 +/- 21.7163'  | 1.6665 +/- 3.4764'      | 0.07700534759   |
| Frontal Alpha     | -7.5524 +/- 16.1438'  | 1.1917 +/- 2.4171'      | 0.07700534759   |
| Frontal Beta      | -5.1122 +/- 11.3833'  | 1.0241 +/- 2.2472'      | 0.07700534759   |
| Frontal Delta     | -11.6691 +/- 26.2558' | 2.3962 +/- 4.4571'      | 0.07700534759   |
| Frontal Gamma     | 0.2117 +/- 0.73106'   | 0.07288 +/- 0.32701'    | 0.9314273961    |
| Frontal Overall   | -0.51373 +/- 2.5535'  | -1.2613 +/- 1.3139'     | 0.4362813657    |
| Parietal Theta    | -5.3001 +/- 19.11'    | 17.7314 +/- 24.4903'    | 0.1614973262    |
| Parietal Alpha    | -4.0366 +/- 14.3672'  | 13.1384 +/- 18.2628'    | 0.1614973262    |
| Parietal Beta     | -2.2473 +/- 10.2565'  | 12.6266 +/- 17.7858'    | 0.1614973262    |
| Parietal Delta    | -5.8433 +/- 22.5219'  | 21.8295 +/- 27.9365'    | 0.1902509255    |
| Parietal Gamma    | 0.8617 +/- 1.2591'    | 2.9905 +/- 5.6949'      | 0.7961744138    |
| Parietal Overall  | 0.073989 +/- 3.5537'  | -0.091209 +/- 2.4644'   | 0.9314273961    |
| Temporal Theta    | 3.8076 +/- 14.8732'   | -105.8772 +/- 314.0665' | 0.38650761      |
| Temporal Alpha    | 3.0311 +/- 11.436'    | -91.3527 +/- 272.1884'  | 0.4894282188    |
| Temporal Beta     | 2.9456 +/- 9.1562'    | -90.3684 +/- 269.7723'  | 0.5457013575    |
| Temporal Delta    | 4.5398 +/- 18.0382'   | -109.2194 +/- 323.4772' | 0.4894282188    |
| Temporal Gamma    | 0.70986 +/- 0.88492'  | -17.2078 +/- 51.544'    | 0.01419169066   |
| Temporal Overall  | 1.7062 +/- 5.4437'    | 0.40283 +/- 1.8606'     | 0.6048128342    |
| Occipital Theta   | -0.56087 +/- 27.8406' | 38.2249 +/- 103.0521'   | 0.06252570958   |
| Occipital Alpha   | -0.3178 +/- 20.7374'  | 27.1274 +/- 71.6988'    | 0.07700534759   |
| Occipital Beta    | 0.29551 +/- 15.665'   | 23.9342 +/- 63.2968'    | 0.07700534759   |
| Occipital Delta   | -1.175 +/- 33.3575'   | 47.2197 +/- 130.0555'   | 0.09391197038   |
| Occipital Gamma   | 0.58221 +/- 1.1827'   | 1.3258 +/- 3.6129'      | 0.2224187577    |
| Occipital Overall | 0.9807 +/- 3.5504'    | 0.2549 +/- 1.8129'      | 0.5457013575    |
| Overall Theta     | -12.0427 +/- 43.05'   | -48.2534 +/- 315.753'   | 0.5457013575    |
| Overall Alpha     | -8.8759 +/- 31.9156'  | -49.8963 +/- 268.7922'  | 0.5457013575    |
| Overall Beta      | -4.1182 +/- 23.0267'  | -52.7828 +/- 263.6175'  | 0.6048128342    |
| Overall Delta     | -14.1473 +/- 53.4749' | -37.7745 +/- 336.5284'  | 0.4894282188    |
| Overall Gamma     | 2.3654 +/- 2.446'     | -12.8188 +/- 45.5572'   | 0.1359111477    |
| Overall Overall   | 2.2472 +/- 10.4338'   | -0.69472 +/- 4.6668'    | 0.7961744138    |

**Table S6.** Inter-electrode coherence measures in the overall spectrum, untreated vs. treated at 12 months.

| <b>Band</b>   | <b>Treated</b>       | <b>Untreated</b>     | <b><i>p</i></b> |
|---------------|----------------------|----------------------|-----------------|
| Fp2-C4 Theta  | 0.4877 +/- 0.30732'  | 0.36682 +/- 0.24738' | 0.38650761      |
| Fp2-O2 Theta  | 0.47656 +/- 0.27582' | 0.3651 +/- 0.24987'  | 0.3401069519    |
| Fp2-T4 Theta  | 0.3127 +/- 0.21923'  | 0.29357 +/- 0.23141' | 0.4362813657    |
| Fp2-Fp1 Theta | 0.40403 +/- 0.26857' | 0.34769 +/- 0.26482' | 0.7304401481    |
| Fp2-C3 Theta  | 0.26735 +/- 0.10601' | 0.28589 +/- 0.1489'  | 1               |
| Fp2-T3 Theta  | 0.25104 +/- 0.10249' | 0.29253 +/- 0.17014' | 0.7961744138    |

|               |                       |                      |               |
|---------------|-----------------------|----------------------|---------------|
| Fp2-O1 Theta  | 0.31389 +/- 0.17544'  | 0.2656 +/- 0.13721'  | 0.6048128342  |
| C4-O2 Theta   | 0.40502 +/- 0.23058'  | 0.36346 +/- 0.236'   | 0.5457013575  |
| C4-T4 Theta   | 0.46569 +/- 0.32496'  | 0.32334 +/- 0.21726' | 0.2973262032  |
| C4-Fp1 Theta  | 0.31488 +/- 0.057842' | 0.26451 +/- 0.13775' | 0.05030851501 |
| C4-C3 Theta   | 0.26776 +/- 0.1138'   | 0.33329 +/- 0.13861' | 0.6048128342  |
| C4-T3 Theta   | 0.23185 +/- 0.1016'   | 0.29444 +/- 0.17917' | 0.863307281   |
| C4-O1 Theta   | 0.24027 +/- 0.088439' | 0.22884 +/- 0.10157' | 0.3401069519  |
| O2-T4 Theta   | 0.41396 +/- 0.20807'  | 0.44796 +/- 0.23942' | 0.7961744138  |
| O2-Fp1 Theta  | 0.37292 +/- 0.17404'  | 0.26743 +/- 0.11093' | 0.1902509255  |
| O2-C3 Theta   | 0.27888 +/- 0.10961'  | 0.29048 +/- 0.17897' | 0.6664747018  |
| O2-T3 Theta   | 0.31042 +/- 0.10167'  | 0.28452 +/- 0.17145' | 0.4362813657  |
| O2-O1 Theta   | 0.3835 +/- 0.20224'   | 0.36102 +/- 0.2122'  | 0.863307281   |
| T4-Fp1 Theta  | 0.25123 +/- 0.084639' | 0.26789 +/- 0.1569'  | 0.863307281   |
| T4-C3 Theta   | 0.23466 +/- 0.12234'  | 0.27096 +/- 0.18388' | 0.863307281   |
| T4-T3 Theta   | 0.26663 +/- 0.1249'   | 0.3258 +/- 0.16093'  | 0.6048128342  |
| T4-O1 Theta   | 0.28291 +/- 0.14088'  | 0.26737 +/- 0.16943' | 0.4362813657  |
| Fp1-C3 Theta  | 0.37484 +/- 0.15863'  | 0.39525 +/- 0.21459' | 1             |
| Fp1-T3 Theta  | 0.32069 +/- 0.10722'  | 0.3134 +/- 0.19248'  | 0.4362813657  |
| Fp1-O1 Theta  | 0.40555 +/- 0.25097'  | 0.33325 +/- 0.13769' | 0.7304401481  |
| C3-T3 Theta   | 0.3911 +/- 0.19017'   | 0.365 +/- 0.24501'   | 0.3401069519  |
| C3-O1 Theta   | 0.28291 +/- 0.11877'  | 0.33251 +/- 0.18279' | 0.863307281   |
| T3-O1 Theta   | 0.50558 +/- 0.24393'  | 0.41087 +/- 0.21321' | 0.4894282188  |
| Fp2-C4 Alpha  | 0.45278 +/- 0.31255'  | 0.38901 +/- 0.19245' | 1             |
| Fp2-O2 Alpha  | 0.45398 +/- 0.25289'  | 0.3991 +/- 0.27182'  | 0.6048128342  |
| Fp2-T4 Alpha  | 0.29749 +/- 0.17816'  | 0.33401 +/- 0.26466' | 0.7304401481  |
| Fp2-Fp1 Alpha | 0.3756 +/- 0.23692'   | 0.3616 +/- 0.27758'  | 1             |
| Fp2-C3 Alpha  | 0.23675 +/- 0.11282'  | 0.32741 +/- 0.26468' | 1             |
| Fp2-T3 Alpha  | 0.25453 +/- 0.11872'  | 0.31572 +/- 0.25222' | 1             |
| Fp2-O1 Alpha  | 0.30513 +/- 0.13063'  | 0.29144 +/- 0.19382' | 0.6664747018  |
| C4-O2 Alpha   | 0.40335 +/- 0.22984'  | 0.35822 +/- 0.21868' | 0.5457013575  |
| C4-T4 Alpha   | 0.4317 +/- 0.33232'   | 0.35371 +/- 0.21468' | 1             |
| C4-Fp1 Alpha  | 0.28109 +/- 0.10645'  | 0.31927 +/- 0.21564' | 1             |
| C4-C3 Alpha   | 0.25158 +/- 0.12137'  | 0.34969 +/- 0.17888' | 0.3401069519  |
| C4-T3 Alpha   | 0.22474 +/- 0.12916'  | 0.29939 +/- 0.20752' | 0.863307281   |
| C4-O1 Alpha   | 0.2491 +/- 0.12196'   | 0.28717 +/- 0.2005'  | 0.9314273961  |
| O2-T4 Alpha   | 0.3966 +/- 0.22393'   | 0.47503 +/- 0.28516' | 0.9314273961  |
| O2-Fp1 Alpha  | 0.33405 +/- 0.11998'  | 0.30109 +/- 0.19959' | 0.2580830934  |
| O2-C3 Alpha   | 0.25965 +/- 0.097567' | 0.3076 +/- 0.24042'  | 0.6664747018  |
| O2-T3 Alpha   | 0.29004 +/- 0.10088'  | 0.29354 +/- 0.23201' | 0.38650761    |
| O2-O1 Alpha   | 0.38776 +/- 0.16487'  | 0.38545 +/- 0.25847' | 0.7304401481  |
| T4-Fp1 Alpha  | 0.24944 +/- 0.11065'  | 0.30578 +/- 0.23906' | 1             |
| T4-C3 Alpha   | 0.22425 +/- 0.13115'  | 0.29726 +/- 0.24995' | 0.9314273961  |
| T4-T3 Alpha   | 0.26807 +/- 0.15089'  | 0.33271 +/- 0.21011' | 0.7961744138  |

|               |                       |                      |              |
|---------------|-----------------------|----------------------|--------------|
| T4-O1 Alpha   | 0.31002 +/- 0.18669'  | 0.29087 +/- 0.23666' | 0.863307281  |
| Fp1-C3 Alpha  | 0.40276 +/- 0.14175'  | 0.39945 +/- 0.22008' | 0.6664747018 |
| Fp1-T3 Alpha  | 0.33438 +/- 0.13156'  | 0.33129 +/- 0.22615' | 0.3401069519 |
| Fp1-O1 Alpha  | 0.36868 +/- 0.22699'  | 0.39871 +/- 0.1834'  | 0.7961744138 |
| C3-T3 Alpha   | 0.42965 +/- 0.2014'   | 0.40546 +/- 0.29913' | 0.38650761   |
| C3-O1 Alpha   | 0.31452 +/- 0.16321'  | 0.35477 +/- 0.23514' | 1            |
| T3-O1 Alpha   | 0.53567 +/- 0.27481'  | 0.42569 +/- 0.25578' | 0.5457013575 |
| Fp2-C4 Beta   | 0.41586 +/- 0.27326'  | 0.3984 +/- 0.17589'  | 0.6664747018 |
| Fp2-O2 Beta   | 0.4244 +/- 0.22727'   | 0.3848 +/- 0.238'    | 0.4362813657 |
| Fp2-T4 Beta   | 0.27303 +/- 0.15414'  | 0.32683 +/- 0.2301'  | 0.863307281  |
| Fp2-Fp1 Beta  | 0.362 +/- 0.15392'    | 0.32204 +/- 0.22687' | 0.6048128342 |
| Fp2-C3 Beta   | 0.26387 +/- 0.12876'  | 0.31446 +/- 0.24829' | 1            |
| Fp2-T3 Beta   | 0.29067 +/- 0.14085'  | 0.27122 +/- 0.20212' | 0.6048128342 |
| Fp2-O1 Beta   | 0.31111 +/- 0.14105'  | 0.27238 +/- 0.18265' | 0.38650761   |
| C4-O2 Beta    | 0.39189 +/- 0.21512'  | 0.36309 +/- 0.17577' | 0.7961744138 |
| C4-T4 Beta    | 0.44795 +/- 0.30815'  | 0.41282 +/- 0.23412' | 1            |
| C4-Fp1 Beta   | 0.28816 +/- 0.096975' | 0.31525 +/- 0.20217' | 1            |
| C4-C3 Beta    | 0.25297 +/- 0.13445'  | 0.32063 +/- 0.16803' | 0.6664747018 |
| C4-T3 Beta    | 0.237 +/- 0.1267'     | 0.24947 +/- 0.14502' | 0.863307281  |
| C4-O1 Beta    | 0.27018 +/- 0.12294'  | 0.29541 +/- 0.19087' | 0.9314273961 |
| O2-T4 Beta    | 0.40622 +/- 0.21194'  | 0.42046 +/- 0.28987' | 0.9314273961 |
| O2-Fp1 Beta   | 0.29991 +/- 0.12251'  | 0.27607 +/- 0.15506' | 0.5457013575 |
| O2-C3 Beta    | 0.29353 +/- 0.12566'  | 0.29178 +/- 0.20122' | 0.4362813657 |
| O2-T3 Beta    | 0.32615 +/- 0.15418'  | 0.26518 +/- 0.18819' | 0.2580830934 |
| O2-O1 Beta    | 0.39907 +/- 0.13943'  | 0.37253 +/- 0.22341' | 0.5457013575 |
| T4-Fp1 Beta   | 0.25048 +/- 0.11366'  | 0.27274 +/- 0.20269' | 0.6048128342 |
| T4-C3 Beta    | 0.24062 +/- 0.15353'  | 0.25719 +/- 0.21168' | 0.9314273961 |
| T4-T3 Beta    | 0.2704 +/- 0.16635'   | 0.29604 +/- 0.18457' | 0.9314273961 |
| T4-O1 Beta    | 0.29772 +/- 0.19626'  | 0.26359 +/- 0.19106' | 0.6664747018 |
| Fp1-C3 Beta   | 0.41887 +/- 0.14621'  | 0.33896 +/- 0.17125' | 0.2580830934 |
| Fp1-T3 Beta   | 0.37072 +/- 0.17346'  | 0.27811 +/- 0.14343' | 0.11349239   |
| Fp1-O1 Beta   | 0.39611 +/- 0.21986'  | 0.3348 +/- 0.13533'  | 0.4894282188 |
| C3-T3 Beta    | 0.49482 +/- 0.23227'  | 0.43683 +/- 0.23529' | 0.7304401481 |
| C3-O1 Beta    | 0.34199 +/- 0.16235'  | 0.32869 +/- 0.21663' | 0.5457013575 |
| T3-O1 Beta    | 0.52323 +/- 0.29956'  | 0.37922 +/- 0.22598' | 0.3401069519 |
| Fp2-C4 Delta  | 0.48156 +/- 0.26819'  | 0.35407 +/- 0.2463'  | 0.2973262032 |
| Fp2-O2 Delta  | 0.46589 +/- 0.24109'  | 0.36229 +/- 0.25946' | 0.3401069519 |
| Fp2-T4 Delta  | 0.31687 +/- 0.25126'  | 0.2607 +/- 0.22575'  | 0.2973262032 |
| Fp2-Fp1 Delta | 0.39657 +/- 0.24208'  | 0.35301 +/- 0.23469' | 0.6048128342 |
| Fp2-C3 Delta  | 0.24948 +/- 0.092452' | 0.275 +/- 0.099888'  | 0.5457013575 |
| Fp2-T3 Delta  | 0.24738 +/- 0.10231'  | 0.23817 +/- 0.10332' | 0.7304401481 |
| Fp2-O1 Delta  | 0.31842 +/- 0.17022'  | 0.25555 +/- 0.10617' | 0.6221719457 |
| C4-O2 Delta   | 0.40914 +/- 0.15797'  | 0.36913 +/- 0.23217' | 0.3401069519 |



---

|               |                       |                       |               |
|---------------|-----------------------|-----------------------|---------------|
| C4-T4 Delta   | 0.48818 +/- 0.34848'  | 0.35356 +/- 0.19108'  | 0.5457013575  |
| C4-Fp1 Delta  | 0.31715 +/- 0.082133' | 0.29053 +/- 0.10659'  | 0.6664747018  |
| C4-C3 Delta   | 0.25443 +/- 0.10737'  | 0.34162 +/- 0.13116'  | 0.2224187577  |
| C4-T3 Delta   | 0.24383 +/- 0.12012'  | 0.28874 +/- 0.15294'  | 0.9314273961  |
| C4-O1 Delta   | 0.26491 +/- 0.13018'  | 0.23867 +/- 0.09093'  | 0.6664747018  |
| O2-T4 Delta   | 0.40139 +/- 0.21178'  | 0.35067 +/- 0.24107'  | 0.4362813657  |
| O2-Fp1 Delta  | 0.37567 +/- 0.1812'   | 0.26183 +/- 0.092159' | 0.1614973262  |
| O2-C3 Delta   | 0.25398 +/- 0.067362' | 0.31377 +/- 0.13597'  | 0.3401069519  |
| O2-T3 Delta   | 0.26585 +/- 0.092402' | 0.25199 +/- 0.14335'  | 0.4362813657  |
| O2-O1 Delta   | 0.33294 +/- 0.18492'  | 0.36149 +/- 0.16203'  | 0.7304401481  |
| T4-Fp1 Delta  | 0.24025 +/- 0.090275' | 0.25588 +/- 0.098832' | 0.7304401481  |
| T4-C3 Delta   | 0.23078 +/- 0.10605'  | 0.28282 +/- 0.13776'  | 0.6048128342  |
| T4-T3 Delta   | 0.23033 +/- 0.12613'  | 0.28229 +/- 0.12105'  | 0.6664747018  |
| T4-O1 Delta   | 0.29488 +/- 0.16025'  | 0.23857 +/- 0.1166'   | 0.38650761    |
| Fp1-C3 Delta  | 0.35674 +/- 0.12247'  | 0.33413 +/- 0.12178'  | 0.7961744138  |
| Fp1-T3 Delta  | 0.2805 +/- 0.090775'  | 0.25534 +/- 0.11661'  | 0.4894282188  |
| Fp1-O1 Delta  | 0.40638 +/- 0.24933'  | 0.25521 +/- 0.0924'   | 0.2580830934  |
| C3-T3 Delta   | 0.38972 +/- 0.20041'  | 0.35617 +/- 0.21558'  | 0.5457013575  |
| C3-O1 Delta   | 0.28972 +/- 0.09552'  | 0.29129 +/- 0.15857'  | 0.5457013575  |
| T3-O1 Delta   | 0.43364 +/- 0.22177'  | 0.35889 +/- 0.23647'  | 0.38650761    |
| Fp2-C4 Gamma  | 0.4505 +/- 0.27769'   | 0.38127 +/- 0.20789'  | 0.6664747018  |
| Fp2-O2 Gamma  | 0.39154 +/- 0.2013'   | 0.34242 +/- 0.19967'  | 0.4362813657  |
| Fp2-T4 Gamma  | 0.30502 +/- 0.19941'  | 0.27039 +/- 0.16307'  | 0.7304401481  |
| Fp2-Fp1 Gamma | 0.38662 +/- 0.2254'   | 0.23171 +/- 0.15786'  | 0.1359111477  |
| Fp2-C3 Gamma  | 0.3128 +/- 0.16806'   | 0.25352 +/- 0.1683'   | 0.3401069519  |
| Fp2-T3 Gamma  | 0.31592 +/- 0.18116'  | 0.18563 +/- 0.084138' | 0.11349239    |
| Fp2-O1 Gamma  | 0.34019 +/- 0.20613'  | 0.21739 +/- 0.12311'  | 0.11349239    |
| C4-O2 Gamma   | 0.39939 +/- 0.18859'  | 0.33671 +/- 0.14095'  | 0.5457013575  |
| C4-T4 Gamma   | 0.47538 +/- 0.30121'  | 0.40544 +/- 0.20904'  | 0.5457013575  |
| C4-Fp1 Gamma  | 0.31188 +/- 0.11897'  | 0.24208 +/- 0.15621'  | 0.1902509255  |
| C4-C3 Gamma   | 0.28802 +/- 0.15349'  | 0.29427 +/- 0.19081'  | 0.7961744138  |
| C4-T3 Gamma   | 0.26743 +/- 0.13315'  | 0.19322 +/- 0.071853' | 0.1614973262  |
| C4-O1 Gamma   | 0.28411 +/- 0.11631'  | 0.25586 +/- 0.12924'  | 0.5457013575  |
| O2-T4 Gamma   | 0.38681 +/- 0.17538'  | 0.35851 +/- 0.24281'  | 0.6048128342  |
| O2-Fp1 Gamma  | 0.2989 +/- 0.11947'   | 0.2099 +/- 0.065715'  | 0.11349239    |
| O2-C3 Gamma   | 0.27463 +/- 0.094455' | 0.27039 +/- 0.17969'  | 0.6048128342  |
| O2-T3 Gamma   | 0.28047 +/- 0.093754' | 0.22625 +/- 0.12394'  | 0.2224187577  |
| O2-O1 Gamma   | 0.38401 +/- 0.1255'   | 0.36763 +/- 0.19165'  | 0.7961744138  |
| T4-Fp1 Gamma  | 0.26777 +/- 0.19241'  | 0.17655 +/- 0.051623' | 0.2973262032  |
| T4-C3 Gamma   | 0.25548 +/- 0.19067'  | 0.21022 +/- 0.14394'  | 0.6664747018  |
| T4-T3 Gamma   | 0.26703 +/- 0.18753'  | 0.21486 +/- 0.10027'  | 0.6664747018  |
| T4-O1 Gamma   | 0.3001 +/- 0.21919'   | 0.22623 +/- 0.10765'  | 0.6664747018  |
| Fp1-C3 Gamma  | 0.46708 +/- 0.23113'  | 0.27847 +/- 0.14423'  | 0.06252570958 |

---

|                 |                       |                       |                 |
|-----------------|-----------------------|-----------------------|-----------------|
| Fp1-T3 Gamma    | 0.44288 +/- 0.18082'  | 0.1983 +/- 0.031997'  | 0.0002879473468 |
| Fp1-O1 Gamma    | 0.45199 +/- 0.23509'  | 0.22734 +/- 0.040902' | 0.06252570958   |
| C3-T3 Gamma     | 0.51391 +/- 0.26541'  | 0.5295 +/- 0.16844'   | 0.7961744138    |
| C3-O1 Gamma     | 0.403 +/- 0.21339'    | 0.33676 +/- 0.20308'  | 0.6048128342    |
| T3-O1 Gamma     | 0.5187 +/- 0.31328'   | 0.33567 +/- 0.1484'   | 0.2973262032    |
| Fp2-C4 Overall  | 0.45691 +/- 0.25707'  | 0.37512 +/- 0.17018'  | 0.6048128342    |
| Fp2-O2 Overall  | 0.40711 +/- 0.17137'  | 0.3595 +/- 0.16046'   | 0.5457013575    |
| Fp2-T4 Overall  | 0.29806 +/- 0.15306'  | 0.28749 +/- 0.16097'  | 0.6664747018    |
| Fp2-Fp1 Overall | 0.39969 +/- 0.19445'  | 0.31501 +/- 0.2122'   | 0.38650761      |
| Fp2-C3 Overall  | 0.29405 +/- 0.13555'  | 0.3057 +/- 0.20421'   | 0.7961744138    |
| Fp2-T3 Overall  | 0.29902 +/- 0.14535'  | 0.26276 +/- 0.14748'  | 0.4894282188    |
| Fp2-O1 Overall  | 0.34769 +/- 0.13918'  | 0.2834 +/- 0.14961'   | 0.2973262032    |
| C4-O2 Overall   | 0.38407 +/- 0.16788'  | 0.37566 +/- 0.15939'  | 1               |
| C4-T4 Overall   | 0.45379 +/- 0.27232'  | 0.41274 +/- 0.14204'  | 0.7961744138    |
| C4-Fp1 Overall  | 0.31492 +/- 0.086371' | 0.2757 +/- 0.16829'   | 0.2973262032    |
| C4-C3 Overall   | 0.2887 +/- 0.13999'   | 0.32477 +/- 0.19284'  | 1               |
| C4-T3 Overall   | 0.27426 +/- 0.13591'  | 0.25515 +/- 0.13333'  | 0.4362813657    |
| C4-O1 Overall   | 0.29915 +/- 0.13311'  | 0.28093 +/- 0.13939'  | 0.7961744138    |
| O2-T4 Overall   | 0.39028 +/- 0.14332'  | 0.39641 +/- 0.2121'   | 0.7961744138    |
| O2-Fp1 Overall  | 0.30889 +/- 0.094482' | 0.27378 +/- 0.099554' | 0.5457013575    |
| O2-C3 Overall   | 0.26681 +/- 0.099421' | 0.30848 +/- 0.20679'  | 0.9314273961    |
| O2-T3 Overall   | 0.27703 +/- 0.081127' | 0.2839 +/- 0.159'     | 0.9314273961    |
| O2-O1 Overall   | 0.39276 +/- 0.12981'  | 0.40015 +/- 0.1752'   | 1               |
| T4-Fp1 Overall  | 0.25466 +/- 0.11214'  | 0.24623 +/- 0.11419'  | 0.6048128342    |
| T4-C3 Overall   | 0.24504 +/- 0.15191'  | 0.25229 +/- 0.17248'  | 1               |
| T4-T3 Overall   | 0.26191 +/- 0.15273'  | 0.26896 +/- 0.12821'  | 0.6664747018    |
| T4-O1 Overall   | 0.29614 +/- 0.17026'  | 0.2784 +/- 0.14173'   | 0.7961744138    |
| Fp1-C3 Overall  | 0.41227 +/- 0.12452'  | 0.33954 +/- 0.14978'  | 0.2973262032    |
| Fp1-T3 Overall  | 0.37269 +/- 0.10512'  | 0.26092 +/- 0.096722' | 0.02443438914   |
| Fp1-O1 Overall  | 0.40335 +/- 0.17371'  | 0.30422 +/- 0.1042'   | 0.1902509255    |
| C3-T3 Overall   | 0.44756 +/- 0.21416'  | 0.50115 +/- 0.12092'  | 0.38650761      |
| C3-O1 Overall   | 0.35549 +/- 0.1491'   | 0.35397 +/- 0.20924'  | 0.5457013575    |
| T3-O1 Overall   | 0.51082 +/- 0.29561'  | 0.41007 +/- 0.15415'  | 0.6048128342    |

**Table S7.** Overall power and power within each band at each electrode location, treated at baseline vs. at 12 months.

| <b>Band</b> | <b>Baseline</b>        | <b>12 Months</b>    | <b><i>p</i></b> |
|-------------|------------------------|---------------------|-----------------|
| Fp2 Theta   | -47.5507 +/- 143.8417' | 4.346 +/- 11.2209'  | 0.09765625      |
| Fp2 Alpha   | -41.4767 +/- 127.0681' | 3.5206 +/- 8.4127'  | 0.09765625      |
| Fp2 Beta    | -19.384 +/- 62.4975'   | 2.8459 +/- 5.7358'  | 0.09765625      |
| Fp2 Delta   | -51.7872 +/- 158.3624' | 5.0624 +/- 13.4924' | 0.09765625      |
| Fp2 Gamma   | 13.649 +/- 34.4742'    | 1.1447 +/- 0.73124' | 0.01171875      |
| Fp2 Overall | -1.9291 +/- 4.3741'    | -1.5346 +/- 4.561'  | 1               |

|              |                       |                       |            |
|--------------|-----------------------|-----------------------|------------|
| C4 Theta     | -5.2122 +/- 49.3782'  | 3.7585 +/- 11.2755'   | 0.359375   |
| C4 Alpha     | -5.6285 +/- 41.5282'  | 3.1006 +/- 8.5459'    | 0.42578125 |
| C4 Beta      | -3.1068 +/- 24.7323'  | 2.0937 +/- 5.7793'    | 0.5703125  |
| C4 Delta     | -3.8606 +/- 60.0226'  | 4.2109 +/- 13.4868'   | 0.359375   |
| C4 Gamma     | 2.2582 +/- 10.6184'   | 0.82813 +/- 0.93321'  | 0.203125   |
| C4 Overall   | 1.0284 +/- 5.1993'    | 0.27311 +/- 5.4459'   | 0.91015625 |
| T4 Theta     | -0.92801 +/- 9.2063'  | 0.8291 +/- 8.1605'    | 0.734375   |
| T4 Alpha     | -0.6639 +/- 7.2729'   | 0.74567 +/- 6.4396'   | 0.734375   |
| T4 Beta      | 0.029378 +/- 4.6261'  | 0.67549 +/- 5.1402'   | 0.8203125  |
| T4 Delta     | -1.0907 +/- 11.2634'  | 0.76267 +/- 9.902'    | 0.734375   |
| T4 Gamma     | 1.3624 +/- 1.6974'    | 0.9266 +/- 0.52462'   | 0.203125   |
| T4 Overall   | 3.0692 +/- 6.5926'    | 0.20284 +/- 5.7367'   | 0.30078125 |
| O2 Theta     | -13.2068 +/- 24.1104' | 1.2135 +/- 19.7864'   | 0.203125   |
| O2 Alpha     | -10.7554 +/- 20.4886' | 0.96673 +/- 15.307'   | 0.203125   |
| O2 Beta      | -6.3833 +/- 12.8202'  | 0.67809 +/- 11.4798'  | 0.203125   |
| O2 Delta     | -15.3746 +/- 26.8835' | 1.3924 +/- 21.7912'   | 0.203125   |
| O2 Gamma     | 3.1233 +/- 4.8017'    | 1.0434 +/- 0.24661'   | 0.00390625 |
| O2 Overall   | 1.1752 +/- 6.4051'    | -0.93669 +/- 5.6042'  | 0.359375   |
| Fp1 Theta    | -6.4613 +/- 11.7724'  | -5.6436 +/- 14.5087'  | 0.8203125  |
| Fp1 Alpha    | -5.2494 +/- 9.6817'   | -4.0319 +/- 10.8357'  | 0.8203125  |
| Fp1 Beta     | -2.5847 +/- 6.0835'   | -2.2663 +/- 7.8564'   | 1          |
| Fp1 Delta    | -7.7167 +/- 14.3276'  | -6.6069 +/- 17.7835'  | 0.91015625 |
| Fp1 Gamma    | 2.6713 +/- 2.3099'    | 1.3564 +/- 0.39207'   | 0.09765625 |
| Fp1 Overall  | -1.752 +/- 4.421'     | -2.0483 +/- 2.7908'   | 0.91015625 |
| C3 Theta     | 9.6325 +/- 21.8476'   | -1.5415 +/- 15.1929'  | 0.359375   |
| C3 Alpha     | 7.3295 +/- 15.4487'   | -0.93597 +/- 11.5032' | 0.359375   |
| C3 Beta      | 6.7814 +/- 14.3278'   | -0.15355 +/- 8.3969'  | 0.42578125 |
| C3 Delta     | 11.1757 +/- 26.4174'  | -1.6323 +/- 17.5461'  | 0.49609375 |
| C3 Gamma     | 1.1272 +/- 1.6614'    | 1.6898 +/- 0.6791'    | 0.734375   |
| C3 Overall   | 1.4238 +/- 4.2144'    | 0.34711 +/- 4.9042'   | 0.49609375 |
| T3 Theta     | 20.8459 +/- 54.9947'  | 4.6367 +/- 12.0363'   | 0.91015625 |
| T3 Alpha     | 16.5229 +/- 42.9367'  | 3.7768 +/- 9.1438'    | 0.8203125  |
| T3 Beta      | 11.5948 +/- 28.738'   | 3.6211 +/- 7.2616'    | 0.91015625 |
| T3 Delta     | 25.4483 +/- 68.4991'  | 5.3024 +/- 14.2394'   | 0.8203125  |
| T3 Gamma     | -0.94198 +/- 6.1223'  | 1.6364 +/- 0.46674'   | 0.09765625 |
| T3 Overall   | 3.3901 +/- 4.859'     | 1.909 +/- 6.9675'     | 0.359375   |
| O1 Theta     | -2.7495 +/- 17.1427'  | 0.65271 +/- 28.8086'  | 1          |
| O1 Alpha     | -2.0957 +/- 13.9568'  | 0.64892 +/- 21.4488'  | 0.8203125  |
| O1 Beta      | -1.226 +/- 9.5359'    | 0.97378 +/- 16.1414'  | 0.91015625 |
| O1 Delta     | -3.1572 +/- 18.874'   | 0.21728 +/- 35.0435'  | 0.91015625 |
| O1 Gamma     | 1.084 +/- 1.2943'     | 1.6256 +/- 1.0923'    | 0.734375   |
| O1 Overall   | 1.353 +/- 4.6689'     | 0.044024 +/- 6.3288'  | 0.42578125 |
| R hemi Theta | -16.7244 +/- 53.0667' | 2.5368 +/- 7.5549'    | 0.30078125 |

|                 |                       |                      |            |
|-----------------|-----------------------|----------------------|------------|
| R hemi Alpha    | -14.6311 +/- 46.6077' | 2.0833 +/- 5.6825'   | 0.359375   |
| R hemi Beta     | -7.2112 +/- 24.3645'  | 1.5733 +/- 4.2176'   | 0.30078125 |
| R hemi Delta    | -18.0279 +/- 59.2178' | 2.8571 +/- 8.8378'   | 0.42578125 |
| R hemi Gamma    | 5.0982 +/- 12.4531'   | 0.98572 +/- 0.47304' | 0.09765625 |
| R hemi Overall  | 0.83584 +/- 5.2025'   | -0.4988 +/- 4.7612'  | 0.49609375 |
| L hemi Theta    | 5.317 +/- 16.0133'    | -0.4739 +/- 8.4564'  | 0.49609375 |
| L hemi Alpha    | 4.1268 +/- 12.4357'   | -0.13556 +/- 6.4339' | 0.5703125  |
| L hemi Beta     | 3.6414 +/- 8.6745'    | 0.54377 +/- 4.7383'  | 0.42578125 |
| L hemi Delta    | 6.4374 +/- 19.631'    | -0.67983 +/- 10.201' | 0.42578125 |
| L hemi Gamma    | 0.98516 +/- 1.7924'   | 1.5771 +/- 0.35924'  | 0.30078125 |
| L hemi Overall  | 1.1037 +/- 4.0083'    | 0.062953 +/- 5.0083' | 0.359375   |
| Overall Theta   | -5.7037 +/- 28.2429'  | 1.0314 +/- 5.9443'   | 0.734375   |
| Overall Alpha   | -5.2521 +/- 24.6106'  | 0.97391 +/- 4.5747'  | 0.734375   |
| Overall Beta    | -1.7849 +/- 13.3215'  | 1.0585 +/- 3.4403'   | 0.49609375 |
| Overall Delta   | -5.7954 +/- 31.7381'  | 1.0886 +/- 6.8119'   | 0.8203125  |
| Overall Gamma   | 3.0417 +/- 6.3182'    | 1.2814 +/- 0.28797'  | 0.734375   |
| Overall Overall | 0.96979 +/- 4.4172'   | -0.21794 +/- 4.709'  | 0.359375   |

**Table S8.** Hemispheric asymmetry, overall and within each band, treated at baseline vs. at 12 months.

| <b>Band</b>      | <b>Baseline</b>       | <b>12 Months</b>      | <b><i>p</i></b> |
|------------------|-----------------------|-----------------------|-----------------|
| Frontal Theta    | 41.0888 +/- 137.9382' | -9.9898 +/- 21.7163'  | 0.49609375      |
| Frontal Alpha    | 36.2265 +/- 121.5779' | -7.5524 +/- 16.1438'  | 0.49609375      |
| Frontal Beta     | 16.7993 +/- 60.2644'  | -5.1122 +/- 11.3833'  | 0.49609375      |
| Frontal Delta    | 44.0713 +/- 152.0418' | -11.6691 +/- 26.2558' | 0.49609375      |
| Frontal Gamma    | -10.9776 +/- 32.5008' | 0.2117 +/- 0.73106'   | 0.25            |
| Frontal Overall  | 0.17714 +/- 2.2727'   | -0.51373 +/- 2.5535'  | 0.65234375      |
| Parietal Theta   | 14.8442 +/- 59.4537'  | -5.3001 +/- 19.11'    | 0.359375        |
| Parietal Alpha   | 12.957 +/- 48.2804'   | -4.0366 +/- 14.3672'  | 0.359375        |
| Parietal Beta    | 9.8882 +/- 30.8952'   | -2.2473 +/- 10.2565'  | 0.30078125      |
| Parietal Delta   | 15.0364 +/- 72.5403'  | -5.8433 +/- 22.5219'  | 0.42578125      |
| Parietal Gamma   | -1.1309 +/- 11.8212'  | 0.8617 +/- 1.2591'    | 0.42578125      |
| Parietal Overall | 0.39547 +/- 3.4069'   | 0.073989 +/- 3.5537'  | 0.91015625      |
| Temporal Theta   | 21.7736 +/- 57.8009'  | 3.8076 +/- 14.8732'   | 0.734375        |
| Temporal Alpha   | 17.1863 +/- 45.0771'  | 3.0311 +/- 11.436'    | 0.734375        |
| Temporal Beta    | 11.5654 +/- 30.2151'  | 2.9456 +/- 9.1562'    | 1               |
| Temporal Delta   | 26.5389 +/- 72.192'   | 4.5398 +/- 18.0382'   | 0.8203125       |
| Temporal Gamma   | -2.3044 +/- 6.4987'   | 0.70986 +/- 0.88492'  | 0.07421875      |
| Temporal Overall | 0.32091 +/- 4.4997'   | 1.7062 +/- 5.4437'    | 0.91015625      |
| Occipital Theta  | 10.4573 +/- 23.8274'  | -0.56087 +/- 27.8406' | 0.09765625      |
| Occipital Alpha  | 8.6597 +/- 20.5463'   | -0.3178 +/- 20.7374'  | 0.09765625      |
| Occipital Beta   | 5.1574 +/- 11.471'    | 0.29551 +/- 15.665'   | 0.12890625      |
| Occipital Delta  | 12.2173 +/- 26.5856'  | -1.175 +/- 33.3575'   | 0.09765625      |

|                   |                       |                       |            |
|-------------------|-----------------------|-----------------------|------------|
| Occipital Gamma   | -2.0393 +/- 5.6575'   | 0.58221 +/- 1.1827'   | 0.09765625 |
| Occipital Overall | 0.17781 +/- 3.3702'   | 0.9807 +/- 3.5504'    | 0.734375   |
| Overall Theta     | 88.1648 +/- 217.4111' | -12.0427 +/- 43.05'   | 0.1640625  |
| Overall Alpha     | 75.0309 +/- 188.9366' | -8.8759 +/- 31.9156'  | 0.1640625  |
| Overall Beta      | 43.4108 +/- 100.2333' | -4.1182 +/- 23.0267'  | 0.203125   |
| Overall Delta     | 97.8631 +/- 245.1246' | -14.1473 +/- 53.4749' | 0.203125   |
| Overall Gamma     | -16.4525 +/- 50.1066' | 2.3654 +/- 2.446'     | 0.09765625 |
| Overall Overall   | 1.0714 +/- 11.4666'   | 2.2472 +/- 10.4338'   | 1          |

**Table S9.** Inter-electrode coherence measures in the overall spectrum, treated at baseline vs. at 12 months.

| <b>Band</b>   | <b>Baseline</b>      | <b>12 Months</b>      | <b><i>p</i></b> |
|---------------|----------------------|-----------------------|-----------------|
| Fp2-C4 Theta  | 0.39488 +/- 0.19929' | 0.4877 +/- 0.30732'   | 0.734375        |
| Fp2-O2 Theta  | 0.43856 +/- 0.11658' | 0.47656 +/- 0.27582'  | 0.91015625      |
| Fp2-T4 Theta  | 0.3787 +/- 0.15994'  | 0.3127 +/- 0.21923'   | 0.12890625      |
| Fp2-Fp1 Theta | 0.46204 +/- 0.16753' | 0.40403 +/- 0.26857'  | 0.25            |
| Fp2-C3 Theta  | 0.34263 +/- 0.14834' | 0.26735 +/- 0.10601'  | 0.42578125      |
| Fp2-T3 Theta  | 0.37034 +/- 0.15419' | 0.25104 +/- 0.10249'  | 0.203125        |
| Fp2-O1 Theta  | 0.35844 +/- 0.13733' | 0.31389 +/- 0.17544'  | 0.5703125       |
| C4-O2 Theta   | 0.38617 +/- 0.22401' | 0.40502 +/- 0.23058'  | 0.8203125       |
| C4-T4 Theta   | 0.47847 +/- 0.28006' | 0.46569 +/- 0.32496'  | 1               |
| C4-Fp1 Theta  | 0.37821 +/- 0.17156' | 0.31488 +/- 0.057842' | 0.42578125      |
| C4-C3 Theta   | 0.37856 +/- 0.1808'  | 0.26776 +/- 0.1138'   | 0.25            |
| C4-T3 Theta   | 0.3059 +/- 0.12841'  | 0.23185 +/- 0.1016'   | 0.203125        |
| C4-O1 Theta   | 0.31504 +/- 0.12947' | 0.24027 +/- 0.088439' | 0.203125        |
| O2-T4 Theta   | 0.52955 +/- 0.27429' | 0.41396 +/- 0.20807'  | 0.359375        |
| O2-Fp1 Theta  | 0.39486 +/- 0.14794' | 0.37292 +/- 0.17404'  | 0.65234375      |
| O2-C3 Theta   | 0.35104 +/- 0.17727' | 0.27888 +/- 0.10961'  | 0.25            |
| O2-T3 Theta   | 0.33102 +/- 0.15356' | 0.31042 +/- 0.10167'  | 0.8203125       |
| O2-O1 Theta   | 0.3838 +/- 0.14064'  | 0.3835 +/- 0.20224'   | 0.91015625      |
| T4-Fp1 Theta  | 0.37197 +/- 0.15796' | 0.25123 +/- 0.084639' | 0.1640625       |
| T4-C3 Theta   | 0.33391 +/- 0.14912' | 0.23466 +/- 0.12234'  | 0.1640625       |
| T4-T3 Theta   | 0.34288 +/- 0.1397'  | 0.26663 +/- 0.1249'   | 0.359375        |
| T4-O1 Theta   | 0.33074 +/- 0.15777' | 0.28291 +/- 0.14088'  | 0.49609375      |
| Fp1-C3 Theta  | 0.46992 +/- 0.20448' | 0.37484 +/- 0.15863'  | 0.25            |
| Fp1-T3 Theta  | 0.41061 +/- 0.19929' | 0.32069 +/- 0.10722'  | 0.42578125      |
| Fp1-O1 Theta  | 0.45349 +/- 0.16876' | 0.40555 +/- 0.25097'  | 0.49609375      |
| C3-T3 Theta   | 0.3873 +/- 0.24969'  | 0.3911 +/- 0.19017'   | 0.91015625      |
| C3-O1 Theta   | 0.37202 +/- 0.16157' | 0.28291 +/- 0.11877'  | 0.49609375      |
| T3-O1 Theta   | 0.56078 +/- 0.20873' | 0.50558 +/- 0.24393'  | 0.30078125      |
| Fp2-C4 Alpha  | 0.36294 +/- 0.16378' | 0.45278 +/- 0.31255'  | 1               |
| Fp2-O2 Alpha  | 0.39244 +/- 0.13891' | 0.45398 +/- 0.25289'  | 0.49609375      |
| Fp2-T4 Alpha  | 0.33948 +/- 0.11008' | 0.29749 +/- 0.17816'  | 0.42578125      |

---

|               |                      |                       |            |
|---------------|----------------------|-----------------------|------------|
| Fp2-Fp1 Alpha | 0.45438 +/- 0.18'    | 0.3756 +/- 0.23692'   | 0.203125   |
| Fp2-C3 Alpha  | 0.3905 +/- 0.14723'  | 0.23675 +/- 0.11282'  | 0.0546875  |
| Fp2-T3 Alpha  | 0.3966 +/- 0.16994'  | 0.25453 +/- 0.11872'  | 0.1640625  |
| Fp2-O1 Alpha  | 0.37884 +/- 0.16095' | 0.30513 +/- 0.13063'  | 0.30078125 |
| C4-O2 Alpha   | 0.36323 +/- 0.18056' | 0.40335 +/- 0.22984'  | 0.65234375 |
| C4-T4 Alpha   | 0.42842 +/- 0.26768' | 0.4317 +/- 0.33232'   | 0.91015625 |
| C4-Fp1 Alpha  | 0.38936 +/- 0.1364'  | 0.28109 +/- 0.10645'  | 0.25       |
| C4-C3 Alpha   | 0.40439 +/- 0.15915' | 0.25158 +/- 0.12137'  | 0.01953125 |
| C4-T3 Alpha   | 0.32015 +/- 0.152'   | 0.22474 +/- 0.12916'  | 0.25       |
| C4-O1 Alpha   | 0.3411 +/- 0.15067'  | 0.2491 +/- 0.12196'   | 0.1640625  |
| O2-T4 Alpha   | 0.4869 +/- 0.2249'   | 0.3966 +/- 0.22393'   | 0.49609375 |
| O2-Fp1 Alpha  | 0.41211 +/- 0.13224' | 0.33405 +/- 0.11998'  | 0.30078125 |
| O2-C3 Alpha   | 0.40199 +/- 0.15325' | 0.25965 +/- 0.097567' | 0.0546875  |
| O2-T3 Alpha   | 0.35822 +/- 0.15412' | 0.29004 +/- 0.10088'  | 0.359375   |
| O2-O1 Alpha   | 0.44852 +/- 0.13407' | 0.38776 +/- 0.16487'  | 0.30078125 |
| T4-Fp1 Alpha  | 0.36959 +/- 0.13917' | 0.24944 +/- 0.11065'  | 0.09765625 |
| T4-C3 Alpha   | 0.34685 +/- 0.10509' | 0.22425 +/- 0.13115'  | 0.0546875  |
| T4-T3 Alpha   | 0.33789 +/- 0.13989' | 0.26807 +/- 0.15089'  | 0.359375   |
| T4-O1 Alpha   | 0.34458 +/- 0.13552' | 0.31002 +/- 0.18669'  | 0.65234375 |
| Fp1-C3 Alpha  | 0.52185 +/- 0.14435' | 0.40276 +/- 0.14175'  | 0.203125   |
| Fp1-T3 Alpha  | 0.44769 +/- 0.20491' | 0.33438 +/- 0.13156'  | 0.30078125 |
| Fp1-O1 Alpha  | 0.55033 +/- 0.19656' | 0.36868 +/- 0.22699'  | 0.09765625 |
| C3-T3 Alpha   | 0.39806 +/- 0.27138' | 0.42965 +/- 0.2014'   | 0.8203125  |
| C3-O1 Alpha   | 0.46125 +/- 0.14901' | 0.31452 +/- 0.16321'  | 0.12890625 |
| T3-O1 Alpha   | 0.54853 +/- 0.21676' | 0.53567 +/- 0.27481'  | 0.91015625 |
| Fp2-C4 Beta   | 0.39884 +/- 0.16502' | 0.41586 +/- 0.27326'  | 0.91015625 |
| Fp2-O2 Beta   | 0.41875 +/- 0.15661' | 0.4244 +/- 0.22727'   | 0.91015625 |
| Fp2-T4 Beta   | 0.31545 +/- 0.10425' | 0.27303 +/- 0.15414'  | 0.5703125  |
| Fp2-Fp1 Beta  | 0.41227 +/- 0.15275' | 0.362 +/- 0.15392'    | 0.49609375 |
| Fp2-C3 Beta   | 0.37481 +/- 0.15004' | 0.26387 +/- 0.12876'  | 0.203125   |
| Fp2-T3 Beta   | 0.34644 +/- 0.15193' | 0.29067 +/- 0.14085'  | 0.65234375 |
| Fp2-O1 Beta   | 0.37369 +/- 0.15999' | 0.31111 +/- 0.14105'  | 0.30078125 |
| C4-O2 Beta    | 0.35361 +/- 0.15575' | 0.39189 +/- 0.21512'  | 0.8203125  |
| C4-T4 Beta    | 0.4194 +/- 0.25351'  | 0.44795 +/- 0.30815'  | 0.5703125  |
| C4-Fp1 Beta   | 0.36532 +/- 0.1396'  | 0.28816 +/- 0.096975' | 0.359375   |
| C4-C3 Beta    | 0.39957 +/- 0.15548' | 0.25297 +/- 0.13445'  | 0.0390625  |
| C4-T3 Beta    | 0.29162 +/- 0.11246' | 0.237 +/- 0.1267'     | 0.49609375 |
| C4-O1 Beta    | 0.32332 +/- 0.11309' | 0.27018 +/- 0.12294'  | 0.42578125 |
| O2-T4 Beta    | 0.46368 +/- 0.21275' | 0.40622 +/- 0.21194'  | 0.65234375 |
| O2-Fp1 Beta   | 0.4436 +/- 0.13561'  | 0.29991 +/- 0.12251'  | 0.07421875 |
| O2-C3 Beta    | 0.41894 +/- 0.14467' | 0.29353 +/- 0.12566'  | 0.1640625  |
| O2-T3 Beta    | 0.36537 +/- 0.11986' | 0.32615 +/- 0.15418'  | 0.49609375 |
| O2-O1 Beta    | 0.48129 +/- 0.16853' | 0.39907 +/- 0.13943'  | 0.359375   |

---

|               |                       |                       |            |
|---------------|-----------------------|-----------------------|------------|
| T4-Fp1 Beta   | 0.38297 +/- 0.17006'  | 0.25048 +/- 0.11366'  | 0.12890625 |
| T4-C3 Beta    | 0.33485 +/- 0.11546'  | 0.24062 +/- 0.15353'  | 0.12890625 |
| T4-T3 Beta    | 0.34829 +/- 0.14201'  | 0.2704 +/- 0.16635'   | 0.42578125 |
| T4-O1 Beta    | 0.3633 +/- 0.16246'   | 0.29772 +/- 0.19626'  | 0.42578125 |
| Fp1-C3 Beta   | 0.53148 +/- 0.19572'  | 0.41887 +/- 0.14621'  | 0.359375   |
| Fp1-T3 Beta   | 0.4125 +/- 0.18844'   | 0.37072 +/- 0.17346'  | 0.734375   |
| Fp1-O1 Beta   | 0.60532 +/- 0.18987'  | 0.39611 +/- 0.21986'  | 0.09765625 |
| C3-T3 Beta    | 0.36811 +/- 0.25124'  | 0.49482 +/- 0.23227'  | 0.12890625 |
| C3-O1 Beta    | 0.49044 +/- 0.19706'  | 0.34199 +/- 0.16235'  | 0.42578125 |
| T3-O1 Beta    | 0.48776 +/- 0.20844'  | 0.52323 +/- 0.29956'  | 0.734375   |
| Fp2-C4 Delta  | 0.38658 +/- 0.20659'  | 0.48156 +/- 0.26819'  | 0.359375   |
| Fp2-O2 Delta  | 0.35762 +/- 0.11589'  | 0.46589 +/- 0.24109'  | 0.203125   |
| Fp2-T4 Delta  | 0.3575 +/- 0.1671'    | 0.31687 +/- 0.25126'  | 0.25       |
| Fp2-Fp1 Delta | 0.37929 +/- 0.15468'  | 0.39657 +/- 0.24208'  | 0.734375   |
| Fp2-C3 Delta  | 0.32077 +/- 0.098154' | 0.24948 +/- 0.092452' | 0.25       |
| Fp2-T3 Delta  | 0.3494 +/- 0.11964'   | 0.24738 +/- 0.10231'  | 0.0546875  |
| Fp2-O1 Delta  | 0.32954 +/- 0.10037'  | 0.31842 +/- 0.17022'  | 0.91015625 |
| C4-O2 Delta   | 0.31018 +/- 0.18546'  | 0.40914 +/- 0.15797'  | 0.12890625 |
| C4-T4 Delta   | 0.49648 +/- 0.26963'  | 0.48818 +/- 0.34848'  | 0.91015625 |
| C4-Fp1 Delta  | 0.32161 +/- 0.14282'  | 0.31715 +/- 0.082133' | 0.5703125  |
| C4-C3 Delta   | 0.3273 +/- 0.10663'   | 0.25443 +/- 0.10737'  | 0.07421875 |
| C4-T3 Delta   | 0.27787 +/- 0.097859' | 0.24383 +/- 0.12012'  | 0.49609375 |
| C4-O1 Delta   | 0.27945 +/- 0.090114' | 0.26491 +/- 0.13018'  | 0.65234375 |
| O2-T4 Delta   | 0.49744 +/- 0.27169'  | 0.40139 +/- 0.21178'  | 0.65234375 |
| O2-Fp1 Delta  | 0.29066 +/- 0.13282'  | 0.37567 +/- 0.1812'   | 0.09765625 |
| O2-C3 Delta   | 0.29857 +/- 0.11478'  | 0.25398 +/- 0.067362' | 0.30078125 |
| O2-T3 Delta   | 0.26809 +/- 0.10749'  | 0.26585 +/- 0.092402' | 0.91015625 |
| O2-O1 Delta   | 0.31934 +/- 0.12508'  | 0.33294 +/- 0.18492'  | 0.8203125  |
| T4-Fp1 Delta  | 0.29179 +/- 0.11469'  | 0.24025 +/- 0.090275' | 0.359375   |
| T4-C3 Delta   | 0.28371 +/- 0.10929'  | 0.23078 +/- 0.10605'  | 0.25       |
| T4-T3 Delta   | 0.29063 +/- 0.091744' | 0.23033 +/- 0.12613'  | 0.25       |
| T4-O1 Delta   | 0.27892 +/- 0.11494'  | 0.29488 +/- 0.16025'  | 0.8203125  |
| Fp1-C3 Delta  | 0.4286 +/- 0.19024'   | 0.35674 +/- 0.12247'  | 0.359375   |
| Fp1-T3 Delta  | 0.35673 +/- 0.14212'  | 0.2805 +/- 0.090775'  | 0.25       |
| Fp1-O1 Delta  | 0.40079 +/- 0.12875'  | 0.40638 +/- 0.24933'  | 0.91015625 |
| C3-T3 Delta   | 0.3742 +/- 0.25903'   | 0.38972 +/- 0.20041'  | 0.734375   |
| C3-O1 Delta   | 0.35831 +/- 0.13268'  | 0.28972 +/- 0.09552'  | 0.42578125 |
| T3-O1 Delta   | 0.48392 +/- 0.1947'   | 0.43364 +/- 0.22177'  | 0.49609375 |
| Fp2-C4 Gamma  | 0.44381 +/- 0.21927'  | 0.4505 +/- 0.27769'   | 0.91015625 |
| Fp2-O2 Gamma  | 0.42621 +/- 0.18964'  | 0.39154 +/- 0.2013'   | 0.65234375 |
| Fp2-T4 Gamma  | 0.3143 +/- 0.13286'   | 0.30502 +/- 0.19941'  | 0.734375   |
| Fp2-Fp1 Gamma | 0.38161 +/- 0.18441'  | 0.38662 +/- 0.2254'   | 1          |
| Fp2-C3 Gamma  | 0.393 +/- 0.17849'    | 0.3128 +/- 0.16806'   | 0.30078125 |

|                 |                       |                       |            |
|-----------------|-----------------------|-----------------------|------------|
| Fp2-T3 Gamma    | 0.34346 +/- 0.20277'  | 0.31592 +/- 0.18116'  | 1          |
| Fp2-O1 Gamma    | 0.3382 +/- 0.18652'   | 0.34019 +/- 0.20613'  | 1          |
| C4-O2 Gamma     | 0.35171 +/- 0.1409'   | 0.39939 +/- 0.18859'  | 0.359375   |
| C4-T4 Gamma     | 0.40289 +/- 0.25446'  | 0.47538 +/- 0.30121'  | 0.42578125 |
| C4-Fp1 Gamma    | 0.31622 +/- 0.15506'  | 0.31188 +/- 0.11897'  | 1          |
| C4-C3 Gamma     | 0.36325 +/- 0.13675'  | 0.28802 +/- 0.15349'  | 0.25       |
| C4-T3 Gamma     | 0.28422 +/- 0.11551'  | 0.26743 +/- 0.13315'  | 1          |
| C4-O1 Gamma     | 0.28338 +/- 0.12576'  | 0.28411 +/- 0.11631'  | 0.65234375 |
| O2-T4 Gamma     | 0.46823 +/- 0.21849'  | 0.38681 +/- 0.17538'  | 0.65234375 |
| O2-Fp1 Gamma    | 0.39842 +/- 0.13399'  | 0.2989 +/- 0.11947'   | 0.203125   |
| O2-C3 Gamma     | 0.42637 +/- 0.14948'  | 0.27463 +/- 0.094455' | 0.02734375 |
| O2-T3 Gamma     | 0.38408 +/- 0.17961'  | 0.28047 +/- 0.093754' | 0.30078125 |
| O2-O1 Gamma     | 0.45333 +/- 0.19057'  | 0.38401 +/- 0.1255'   | 0.49609375 |
| T4-Fp1 Gamma    | 0.34652 +/- 0.1068'   | 0.26777 +/- 0.19241'  | 0.25       |
| T4-C3 Gamma     | 0.33107 +/- 0.085006' | 0.25548 +/- 0.19067'  | 0.359375   |
| T4-T3 Gamma     | 0.37 +/- 0.13339'     | 0.26703 +/- 0.18753'  | 0.203125   |
| T4-O1 Gamma     | 0.3347 +/- 0.11965'   | 0.3001 +/- 0.21919'   | 0.49609375 |
| Fp1-C3 Gamma    | 0.50211 +/- 0.20083'  | 0.46708 +/- 0.23113'  | 0.8203125  |
| Fp1-T3 Gamma    | 0.37815 +/- 0.20485'  | 0.44288 +/- 0.18082'  | 0.49609375 |
| Fp1-O1 Gamma    | 0.47778 +/- 0.16781'  | 0.45199 +/- 0.23509'  | 0.8203125  |
| C3-T3 Gamma     | 0.44613 +/- 0.27008'  | 0.51391 +/- 0.26541'  | 0.49609375 |
| C3-O1 Gamma     | 0.44283 +/- 0.16621'  | 0.403 +/- 0.21339'    | 1          |
| T3-O1 Gamma     | 0.46218 +/- 0.20809'  | 0.5187 +/- 0.31328'   | 0.734375   |
| Fp2-C4 Overall  | 0.40873 +/- 0.1817'   | 0.45691 +/- 0.25707'  | 1          |
| Fp2-O2 Overall  | 0.40186 +/- 0.11018'  | 0.40711 +/- 0.17137'  | 0.91015625 |
| Fp2-T4 Overall  | 0.31385 +/- 0.095162' | 0.29806 +/- 0.15306'  | 0.8203125  |
| Fp2-Fp1 Overall | 0.41377 +/- 0.10126'  | 0.39969 +/- 0.19445'  | 0.8203125  |
| Fp2-C3 Overall  | 0.37304 +/- 0.11035'  | 0.29405 +/- 0.13555'  | 0.359375   |
| Fp2-T3 Overall  | 0.36194 +/- 0.14128'  | 0.29902 +/- 0.14535'  | 0.5703125  |
| Fp2-O1 Overall  | 0.35476 +/- 0.11247'  | 0.34769 +/- 0.13918'  | 1          |
| C4-O2 Overall   | 0.34112 +/- 0.1397'   | 0.38407 +/- 0.16788'  | 0.42578125 |
| C4-T4 Overall   | 0.43081 +/- 0.25955'  | 0.45379 +/- 0.27232'  | 0.91015625 |
| C4-Fp1 Overall  | 0.33701 +/- 0.11294'  | 0.31492 +/- 0.086371' | 1          |
| C4-C3 Overall   | 0.37598 +/- 0.13841'  | 0.2887 +/- 0.13999'   | 0.25       |
| C4-T3 Overall   | 0.30556 +/- 0.10446'  | 0.27426 +/- 0.13591'  | 0.49609375 |
| C4-O1 Overall   | 0.29068 +/- 0.10042'  | 0.29915 +/- 0.13311'  | 0.734375   |
| O2-T4 Overall   | 0.47982 +/- 0.20184'  | 0.39028 +/- 0.14332'  | 0.49609375 |
| O2-Fp1 Overall  | 0.40458 +/- 0.11861'  | 0.30889 +/- 0.094482' | 0.203125   |
| O2-C3 Overall   | 0.40377 +/- 0.12793'  | 0.26681 +/- 0.099421' | 0.09765625 |
| O2-T3 Overall   | 0.37888 +/- 0.1255'   | 0.27703 +/- 0.081127' | 0.203125   |
| O2-O1 Overall   | 0.46893 +/- 0.16667'  | 0.39276 +/- 0.12981'  | 0.25       |
| T4-Fp1 Overall  | 0.3335 +/- 0.11186'   | 0.25466 +/- 0.11214'  | 0.12890625 |
| T4-C3 Overall   | 0.33531 +/- 0.10693'  | 0.24504 +/- 0.15191'  | 0.203125   |



|                |                       |                      |            |
|----------------|-----------------------|----------------------|------------|
| T4-T3 Overall  | 0.35537 +/- 0.12808'  | 0.26191 +/- 0.15273' | 0.203125   |
| T4-O1 Overall  | 0.34664 +/- 0.095155' | 0.29614 +/- 0.17026' | 0.5703125  |
| Fp1-C3 Overall | 0.49978 +/- 0.18802'  | 0.41227 +/- 0.12452' | 0.25       |
| Fp1-T3 Overall | 0.38379 +/- 0.13499'  | 0.37269 +/- 0.10512' | 0.91015625 |
| Fp1-O1 Overall | 0.47094 +/- 0.13709'  | 0.40335 +/- 0.17371' | 0.734375   |
| C3-T3 Overall  | 0.45252 +/- 0.2586'   | 0.44756 +/- 0.21416' | 1          |
| C3-O1 Overall  | 0.43662 +/- 0.15782'  | 0.35549 +/- 0.1491'  | 0.42578125 |
| T3-O1 Overall  | 0.48316 +/- 0.17354'  | 0.51082 +/- 0.29561' | 0.8203125  |

**Table S10.** Overall power and power within each band at each electrode location, untreated at baseline vs. at 12 months.

| <b>Band</b> | <b>Baseline</b>       | <b>12 Months</b>       | <b><i>p</i></b> |
|-------------|-----------------------|------------------------|-----------------|
| Fp2 Theta   | -1.6147 +/- 6.5254'   | -4.5294 +/- 4.7287'    | 0.07421875      |
| Fp2 Alpha   | -1.1731 +/- 5.0021'   | -3.0898 +/- 3.2086'    | 0.07421875      |
| Fp2 Beta    | -1.4207 +/- 4.1829'   | -2.3148 +/- 2.8251'    | 0.09765625      |
| Fp2 Delta   | -2.4492 +/- 8.624'    | -6.321 +/- 6.182'      | 0.07421875      |
| Fp2 Gamma   | 0.73436 +/- 0.55074'  | 0.97169 +/- 0.34955'   | 0.25            |
| Fp2 Overall | -3.0949 +/- 4.1132'   | -4.604 +/- 1.9025'     | 0.91015625      |
| C4 Theta    | -2.1315 +/- 16.3853'  | -12.6099 +/- 14.725'   | 0.25            |
| C4 Alpha    | -1.382 +/- 12.4684'   | -9.3185 +/- 11.1534'   | 0.30078125      |
| C4 Beta     | -1.2585 +/- 9.5609'   | -8.5623 +/- 10.4676'   | 0.42578125      |
| C4 Delta    | -3.0252 +/- 20.1411'  | -17.2557 +/- 20.5873'  | 0.5703125       |
| C4 Gamma    | 1.1893 +/- 1.09'      | -0.42995 +/- 2.0711'   | 0.42578125      |
| C4 Overall  | -3.2215 +/- 4.8507'   | -3.9997 +/- 3.5107'    | 0.359375        |
| T4 Theta    | 2.5536 +/- 13.1519'   | 109.694 +/- 315.0896'  | 0.07421875      |
| T4 Alpha    | 1.9504 +/- 10.1534'   | 94.4001 +/- 273.0846'  | 0.07421875      |
| T4 Beta     | 1.4846 +/- 8.3281'    | 93.7959 +/- 270.4052'  | 0.09765625      |
| T4 Delta    | 2.7077 +/- 17.2825'   | 114.8333 +/- 324.1421' | 0.0390625       |
| T4 Gamma    | 0.98807 +/- 0.5479'   | 18.8093 +/- 51.5697'   | 0.09765625      |
| T4 Overall  | -0.54291 +/- 3.8246'  | -2.0923 +/- 3.254'     | 0.09765625      |
| O2 Theta    | 4.0086 +/- 8.1257'    | -41.3183 +/- 107.6733' | 0.02734375      |
| O2 Alpha    | 3.1333 +/- 6.0662'    | -29.2041 +/- 75.0885'  | 0.02734375      |
| O2 Beta     | 2.3972 +/- 4.4152'    | -25.2616 +/- 66.1963'  | 0.0390625       |
| O2 Delta    | 4.6939 +/- 10.4838'   | -51.6634 +/- 135.8023' | 0.0390625       |
| O2 Gamma    | 0.93962 +/- 0.45299'  | -0.40508 +/- 3.6966'   | 0.8203125       |
| O2 Overall  | -2.5319 +/- 4.6894'   | -4.2626 +/- 3.1'       | 0.1640625       |
| Fp1 Theta   | 4.2463 +/- 18.4689'   | -2.8628 +/- 1.7287'    | 0.734375        |
| Fp1 Alpha   | 3.7944 +/- 14.4406'   | -1.8982 +/- 1.2077'    | 0.359375        |
| Fp1 Beta    | 3.5336 +/- 13.0959'   | -1.2907 +/- 1.0829'    | 0.734375        |
| Fp1 Delta   | 5.173 +/- 25.3602'    | -3.9248 +/- 2.417'     | 0.8203125       |
| Fp1 Gamma   | 1.5986 +/- 2.0775'    | 1.0446 +/- 0.16285'    | 0.8203125       |
| Fp1 Overall | -2.5234 +/- 3.632'    | -5.8652 +/- 2.1439'    | 0.00390625      |
| C3 Theta    | -17.3424 +/- 27.7711' | 5.1215 +/- 21.1862'    | 0.30078125      |

|                 |                       |                      |            |
|-----------------|-----------------------|----------------------|------------|
| C3 Alpha        | -12.9029 +/- 20.9959' | 3.8199 +/- 15.3817'  | 0.30078125 |
| C3 Beta         | -11.1367 +/- 18.3301' | 4.0642 +/- 15.2576'  | 0.49609375 |
| C3 Delta        | -25.7377 +/- 40.7283' | 4.5737 +/- 22.6244'  | 0.25       |
| C3 Gamma        | 0.35489 +/- 1.2033'   | 2.5605 +/- 4.9571'   | 0.09765625 |
| C3 Overall      | -2.354 +/- 4.9664'    | -4.0909 +/- 4.3529'  | 0.25       |
| T3 Theta        | 9.3832 +/- 17.7964'   | 3.8169 +/- 10.7411'  | 0.91015625 |
| T3 Alpha        | 7.8688 +/- 14.4523'   | 3.0475 +/- 8.3598'   | 1          |
| T3 Beta         | 7.0127 +/- 12.8476'   | 3.4279 +/- 9.124'    | 1          |
| T3 Delta        | 12.5056 +/- 25.2996'  | 5.6136 +/- 15.966'   | 0.91015625 |
| T3 Gamma        | 1.0116 +/- 0.68677'   | 1.6016 +/- 1.3299'   | 0.49609375 |
| T3 Overall      | -0.87694 +/- 4.5616'  | -1.6894 +/- 4.1151'  | 0.42578125 |
| O1 Theta        | -4.4477 +/- 12.5136'  | -3.0936 +/- 6.9851'  | 1          |
| O1 Alpha        | -3.2576 +/- 9.8101'   | -2.0775 +/- 5.319'   | 1          |
| O1 Beta         | -2.4238 +/- 7.511'    | -1.3274 +/- 4.3119'  | 1          |
| O1 Delta        | -6.4055 +/- 15.8787'  | -4.4437 +/- 8.4833'  | 0.91015625 |
| O1 Gamma        | 1.0067 +/- 0.37125'   | 0.92084 +/- 0.41037' | 0.42578125 |
| O1 Overall      | -3.0215 +/- 4.7714'   | -4.0077 +/- 3.1238'  | 0.65234375 |
| R hemi Theta    | 0.70404 +/- 9.1051'   | 12.8093 +/- 85.5026' | 0.42578125 |
| R hemi Alpha    | 0.6322 +/- 6.8814'    | 13.1967 +/- 72.1623' | 0.49609375 |
| R hemi Beta     | 0.30059 +/- 5.3654'   | 14.4142 +/- 70.5478' | 0.49609375 |
| R hemi Delta    | 0.48182 +/- 11.7749'  | 9.8981 +/- 91.0119'  | 0.5703125  |
| R hemi Gamma    | 0.96284 +/- 0.4775'   | 4.7365 +/- 12.6305'  | 0.91015625 |
| R hemi Overall  | -2.3478 +/- 4.093'    | -3.7396 +/- 2.5473'  | 0.12890625 |
| L hemi Theta    | -2.0402 +/- 9.5772'   | 0.74554 +/- 7.1952'  | 0.91015625 |
| L hemi Alpha    | -1.1244 +/- 7.1953'   | 0.72299 +/- 5.3994'  | 0.91015625 |
| L hemi Beta     | -0.75354 +/- 5.8077'  | 1.2185 +/- 5.1383'   | 0.734375   |
| L hemi Delta    | -3.616 +/- 13.4631'   | 0.4547 +/- 7.9624'   | 0.8203125  |
| L hemi Gamma    | 0.99295 +/- 0.65462'  | 1.5319 +/- 1.2919'   | 0.203125   |
| L hemi Overall  | -2.194 +/- 4.1027'    | -3.9133 +/- 2.9704'  | 0.12890625 |
| Overall Theta   | -0.66814 +/- 5.6427'  | 6.7769 +/- 46.0782'  | 0.91015625 |
| Overall Alpha   | -0.24609 +/- 4.183'   | 6.9598 +/- 38.5928'  | 0.91015625 |
| Overall Beta    | -0.22646 +/- 3.1596'  | 7.8161 +/- 37.6269'  | 1          |
| Overall Delta   | -1.5671 +/- 8.115'    | 5.1762 +/- 49.0286'  | 0.91015625 |
| Overall Gamma   | 0.97789 +/- 0.45065'  | 3.1342 +/- 6.9404'   | 0.91015625 |
| Overall Overall | -2.2709 +/- 4.0148'   | -3.8265 +/- 2.7047'  | 0.09765625 |

**Table S11.** Hemispheric asymmetry, overall and within each band, untreated at baseline vs. at 12 months.

| <b>Band</b>   | <b>Baseline</b>     | <b>12 Months</b>   | <b><i>p</i></b> |
|---------------|---------------------|--------------------|-----------------|
| Frontal Theta | 5.8608 +/- 21.203'  | 1.6665 +/- 3.4764' | 0.91015625      |
| Frontal Alpha | 4.9675 +/- 16.5359' | 1.1917 +/- 2.4171' | 0.91015625      |
| Frontal Beta  | 4.9543 +/- 14.8929' | 1.0241 +/- 2.2472' | 1               |
| Frontal Delta | 7.6225 +/- 28.7263' | 2.3962 +/- 4.4571' | 0.91015625      |

|                   |                       |                         |            |
|-------------------|-----------------------|-------------------------|------------|
| Frontal Gamma     | 0.86421 +/- 2.1103'   | 0.07288 +/- 0.32701'    | 0.359375   |
| Frontal Overall   | 0.57149 +/- 2.4073'   | -1.2613 +/- 1.3139'     | 0.12890625 |
| Parietal Theta    | -15.2109 +/- 36.0135' | 17.7314 +/- 24.4903'    | 0.12890625 |
| Parietal Alpha    | -11.5209 +/- 27.2849' | 13.1384 +/- 18.2628'    | 0.07421875 |
| Parietal Beta     | -9.8781 +/- 22.7982'  | 12.6266 +/- 17.7858'    | 0.07421875 |
| Parietal Delta    | -22.7124 +/- 49.1711' | 21.8295 +/- 27.9365'    | 0.12890625 |
| Parietal Gamma    | -0.83442 +/- 1.4105'  | 2.9905 +/- 5.6949'      | 0.00390625 |
| Parietal Overall  | 0.8676 +/- 2.445'     | -0.091209 +/- 2.4644'   | 0.30078125 |
| Temporal Theta    | 6.8296 +/- 16.1171'   | -105.8772 +/- 314.0665' | 0.203125   |
| Temporal Alpha    | 5.9183 +/- 13.4189'   | -91.3527 +/- 272.1884'  | 0.203125   |
| Temporal Beta     | 5.5281 +/- 12.6068'   | -90.3684 +/- 269.7723'  | 0.203125   |
| Temporal Delta    | 9.7977 +/- 23.7658'   | -109.2194 +/- 323.4772' | 0.203125   |
| Temporal Gamma    | 0.023562 +/- 0.53226' | -17.2078 +/- 51.544'    | 0.30078125 |
| Temporal Overall  | -0.33404 +/- 2.4852'  | 0.40283 +/- 1.8606'     | 0.42578125 |
| Occipital Theta   | -8.4563 +/- 17.5338'  | 38.2249 +/- 103.0521'   | 0.01953125 |
| Occipital Alpha   | -6.3909 +/- 13.3715'  | 27.1274 +/- 71.6988'    | 0.01953125 |
| Occipital Beta    | -4.821 +/- 10.1408'   | 23.9342 +/- 63.2968'    | 0.01171875 |
| Occipital Delta   | -11.0994 +/- 22.6268' | 47.2197 +/- 130.0555'   | 0.0546875  |
| Occipital Gamma   | 0.067086 +/- 0.3357'  | 1.3258 +/- 3.6129'      | 1          |
| Occipital Overall | -0.48964 +/- 2.4748'  | 0.2549 +/- 1.8129'      | 0.42578125 |
| Overall Theta     | -10.9771 +/- 59.585'  | -48.2534 +/- 315.753'   | 0.42578125 |
| Overall Alpha     | -7.026 +/- 45.3005'   | -49.8963 +/- 268.7922'  | 0.42578125 |
| Overall Beta      | -4.2166 +/- 36.9007'  | -52.7828 +/- 263.6175'  | 0.42578125 |
| Overall Delta     | -16.3921 +/- 77.6038' | -37.7745 +/- 336.5284'  | 0.42578125 |
| Overall Gamma     | 0.12043 +/- 2.8304'   | -12.8188 +/- 45.5572'   | 0.8203125  |
| Overall Overall   | 0.61544 +/- 6.5684'   | -0.69472 +/- 4.6668'    | 0.42578125 |

**Table S12.** Inter-electrode coherence measures in the overall spectrum, untreated at baseline vs. at 12 months.

| <b>Band</b>   | <b>Baseline</b>      | <b>12 Months</b>     | <b><i>p</i></b> |
|---------------|----------------------|----------------------|-----------------|
| Fp2-C4 Theta  | 0.27081 +/- 0.13146' | 0.36682 +/- 0.24738' | 0.359375        |
| Fp2-O2 Theta  | 0.2562 +/- 0.11246'  | 0.3651 +/- 0.24987'  | 0.734375        |
| Fp2-T4 Theta  | 0.21967 +/- 0.10383' | 0.29357 +/- 0.23141' | 1               |
| Fp2-Fp1 Theta | 0.32464 +/- 0.21667' | 0.34769 +/- 0.26482' | 0.734375        |
| Fp2-C3 Theta  | 0.22099 +/- 0.11575' | 0.28589 +/- 0.1489'  | 0.359375        |
| Fp2-T3 Theta  | 0.22343 +/- 0.11094' | 0.29253 +/- 0.17014' | 0.42578125      |
| Fp2-O1 Theta  | 0.22965 +/- 0.11807' | 0.2656 +/- 0.13721'  | 0.5703125       |
| C4-O2 Theta   | 0.24777 +/- 0.16256' | 0.36346 +/- 0.236'   | 0.203125        |
| C4-T4 Theta   | 0.36583 +/- 0.27638' | 0.32334 +/- 0.21726' | 0.65234375      |
| C4-Fp1 Theta  | 0.22879 +/- 0.20095' | 0.26451 +/- 0.13775' | 0.25            |
| C4-C3 Theta   | 0.26036 +/- 0.22457' | 0.33329 +/- 0.13861' | 0.203125        |
| C4-T3 Theta   | 0.24425 +/- 0.23585' | 0.29444 +/- 0.17917' | 0.25            |
| C4-O1 Theta   | 0.23397 +/- 0.24084' | 0.22884 +/- 0.10157' | 0.203125        |

|               |                      |                      |            |
|---------------|----------------------|----------------------|------------|
| O2-T4 Theta   | 0.48706 +/- 0.28564' | 0.44796 +/- 0.23942' | 0.734375   |
| O2-Fp1 Theta  | 0.23392 +/- 0.17623' | 0.26743 +/- 0.11093' | 0.359375   |
| O2-C3 Theta   | 0.25166 +/- 0.23694' | 0.29048 +/- 0.17897' | 0.30078125 |
| O2-T3 Theta   | 0.25506 +/- 0.2'     | 0.28452 +/- 0.17145' | 0.5703125  |
| O2-O1 Theta   | 0.29043 +/- 0.21475' | 0.36102 +/- 0.2122'  | 0.359375   |
| T4-Fp1 Theta  | 0.21943 +/- 0.20157' | 0.26789 +/- 0.1569'  | 0.25       |
| T4-C3 Theta   | 0.24151 +/- 0.24867' | 0.27096 +/- 0.18388' | 0.359375   |
| T4-T3 Theta   | 0.25456 +/- 0.25251' | 0.3258 +/- 0.16093'  | 0.12890625 |
| T4-O1 Theta   | 0.23896 +/- 0.24031' | 0.26737 +/- 0.16943' | 0.25       |
| Fp1-C3 Theta  | 0.40263 +/- 0.23171' | 0.39525 +/- 0.21459' | 0.91015625 |
| Fp1-T3 Theta  | 0.30963 +/- 0.18596' | 0.3134 +/- 0.19248'  | 0.91015625 |
| Fp1-O1 Theta  | 0.35818 +/- 0.18605' | 0.33325 +/- 0.13769' | 0.91015625 |
| C3-T3 Theta   | 0.41834 +/- 0.24009' | 0.365 +/- 0.24501'   | 0.65234375 |
| C3-O1 Theta   | 0.35346 +/- 0.23653' | 0.33251 +/- 0.18279' | 1          |
| T3-O1 Theta   | 0.39065 +/- 0.2298'  | 0.41087 +/- 0.21321' | 0.91015625 |
| Fp2-C4 Alpha  | 0.30604 +/- 0.1634'  | 0.38901 +/- 0.19245' | 0.49609375 |
| Fp2-O2 Alpha  | 0.31621 +/- 0.15267' | 0.3991 +/- 0.27182'  | 0.734375   |
| Fp2-T4 Alpha  | 0.26776 +/- 0.15927' | 0.33401 +/- 0.26466' | 0.91015625 |
| Fp2-Fp1 Alpha | 0.36291 +/- 0.19476' | 0.3616 +/- 0.27758'  | 1          |
| Fp2-C3 Alpha  | 0.26308 +/- 0.17089' | 0.32741 +/- 0.26468' | 0.5703125  |
| Fp2-T3 Alpha  | 0.26215 +/- 0.17566' | 0.31572 +/- 0.25222' | 0.49609375 |
| Fp2-O1 Alpha  | 0.25868 +/- 0.17987' | 0.29144 +/- 0.19382' | 0.65234375 |
| C4-O2 Alpha   | 0.28159 +/- 0.20222' | 0.35822 +/- 0.21868' | 0.359375   |
| C4-T4 Alpha   | 0.39223 +/- 0.25501' | 0.35371 +/- 0.21468' | 0.8203125  |
| C4-Fp1 Alpha  | 0.26002 +/- 0.23575' | 0.31927 +/- 0.21564' | 0.49609375 |
| C4-C3 Alpha   | 0.29576 +/- 0.24432' | 0.34969 +/- 0.17888' | 0.359375   |
| C4-T3 Alpha   | 0.25324 +/- 0.24129' | 0.29939 +/- 0.20752' | 0.42578125 |
| C4-O1 Alpha   | 0.24384 +/- 0.25411' | 0.28717 +/- 0.2005'  | 0.42578125 |
| O2-T4 Alpha   | 0.43358 +/- 0.29428' | 0.47503 +/- 0.28516' | 0.91015625 |
| O2-Fp1 Alpha  | 0.28589 +/- 0.21357' | 0.30109 +/- 0.19959' | 0.734375   |
| O2-C3 Alpha   | 0.28256 +/- 0.24391' | 0.3076 +/- 0.24042'  | 0.42578125 |
| O2-T3 Alpha   | 0.26456 +/- 0.2127'  | 0.29354 +/- 0.23201' | 1          |
| O2-O1 Alpha   | 0.3124 +/- 0.23773'  | 0.38545 +/- 0.25847' | 0.5703125  |
| T4-Fp1 Alpha  | 0.26505 +/- 0.24066' | 0.30578 +/- 0.23906' | 0.8203125  |
| T4-C3 Alpha   | 0.2505 +/- 0.25472'  | 0.29726 +/- 0.24995' | 0.65234375 |
| T4-T3 Alpha   | 0.25983 +/- 0.25129' | 0.33271 +/- 0.21011' | 0.359375   |
| T4-O1 Alpha   | 0.24715 +/- 0.23395' | 0.29087 +/- 0.23666' | 0.8203125  |
| Fp1-C3 Alpha  | 0.36035 +/- 0.24447' | 0.39945 +/- 0.22008' | 0.8203125  |
| Fp1-T3 Alpha  | 0.30951 +/- 0.22575' | 0.33129 +/- 0.22615' | 0.65234375 |
| Fp1-O1 Alpha  | 0.34291 +/- 0.23205' | 0.39871 +/- 0.1834'  | 0.42578125 |
| C3-T3 Alpha   | 0.44316 +/- 0.20254' | 0.40546 +/- 0.29913' | 0.734375   |
| C3-O1 Alpha   | 0.33634 +/- 0.25694' | 0.35477 +/- 0.23514' | 0.8203125  |
| T3-O1 Alpha   | 0.42092 +/- 0.24519' | 0.42569 +/- 0.25578' | 0.91015625 |

|               |                       |                       |            |
|---------------|-----------------------|-----------------------|------------|
| Fp2-C4 Beta   | 0.3003 +/- 0.15513'   | 0.3984 +/- 0.17589'   | 0.30078125 |
| Fp2-O2 Beta   | 0.3244 +/- 0.17342'   | 0.3848 +/- 0.238'     | 0.734375   |
| Fp2-T4 Beta   | 0.27461 +/- 0.18194'  | 0.32683 +/- 0.2301'   | 0.91015625 |
| Fp2-Fp1 Beta  | 0.34777 +/- 0.23594'  | 0.32204 +/- 0.22687'  | 0.91015625 |
| Fp2-C3 Beta   | 0.25122 +/- 0.1555'   | 0.31446 +/- 0.24829'  | 0.65234375 |
| Fp2-T3 Beta   | 0.2361 +/- 0.16127'   | 0.27122 +/- 0.20212'  | 0.49609375 |
| Fp2-O1 Beta   | 0.23949 +/- 0.16607'  | 0.27238 +/- 0.18265'  | 0.5703125  |
| C4-O2 Beta    | 0.31047 +/- 0.19734'  | 0.36309 +/- 0.17577'  | 0.42578125 |
| C4-T4 Beta    | 0.42289 +/- 0.23603'  | 0.41282 +/- 0.23412'  | 0.8203125  |
| C4-Fp1 Beta   | 0.24778 +/- 0.2208'   | 0.31525 +/- 0.20217'  | 0.5703125  |
| C4-C3 Beta    | 0.28995 +/- 0.22747'  | 0.32063 +/- 0.16803'  | 0.49609375 |
| C4-T3 Beta    | 0.23729 +/- 0.22478'  | 0.24947 +/- 0.14502'  | 0.49609375 |
| C4-O1 Beta    | 0.23973 +/- 0.23961'  | 0.29541 +/- 0.19087'  | 0.30078125 |
| O2-T4 Beta    | 0.39607 +/- 0.29202'  | 0.42046 +/- 0.28987'  | 1          |
| O2-Fp1 Beta   | 0.31543 +/- 0.21805'  | 0.27607 +/- 0.15506'  | 0.91015625 |
| O2-C3 Beta    | 0.30244 +/- 0.22779'  | 0.29178 +/- 0.20122'  | 0.5703125  |
| O2-T3 Beta    | 0.26022 +/- 0.1949'   | 0.26518 +/- 0.18819'  | 0.91015625 |
| O2-O1 Beta    | 0.32854 +/- 0.24132'  | 0.37253 +/- 0.22341'  | 0.5703125  |
| T4-Fp1 Beta   | 0.27069 +/- 0.23652'  | 0.27274 +/- 0.20269'  | 0.91015625 |
| T4-C3 Beta    | 0.24353 +/- 0.23416'  | 0.25719 +/- 0.21168'  | 0.91015625 |
| T4-T3 Beta    | 0.25883 +/- 0.23453'  | 0.29604 +/- 0.18457'  | 0.8203125  |
| T4-O1 Beta    | 0.24362 +/- 0.21351'  | 0.26359 +/- 0.19106'  | 0.49609375 |
| Fp1-C3 Beta   | 0.30873 +/- 0.23812'  | 0.33896 +/- 0.17125'  | 0.734375   |
| Fp1-T3 Beta   | 0.26898 +/- 0.20735'  | 0.27811 +/- 0.14343'  | 0.734375   |
| Fp1-O1 Beta   | 0.29022 +/- 0.22298'  | 0.3348 +/- 0.13533'   | 0.359375   |
| C3-T3 Beta    | 0.42704 +/- 0.23481'  | 0.43683 +/- 0.23529'  | 1          |
| C3-O1 Beta    | 0.33661 +/- 0.27029'  | 0.32869 +/- 0.21663'  | 0.734375   |
| T3-O1 Beta    | 0.44111 +/- 0.27799'  | 0.37922 +/- 0.22598'  | 0.65234375 |
| Fp2-C4 Delta  | 0.25384 +/- 0.10911'  | 0.35407 +/- 0.2463'   | 0.42578125 |
| Fp2-O2 Delta  | 0.22134 +/- 0.063843' | 0.36229 +/- 0.25946'  | 0.25       |
| Fp2-T4 Delta  | 0.20871 +/- 0.081154' | 0.2607 +/- 0.22575'   | 0.734375   |
| Fp2-Fp1 Delta | 0.33567 +/- 0.21601'  | 0.35301 +/- 0.23469'  | 0.8203125  |
| Fp2-C3 Delta  | 0.19466 +/- 0.069298' | 0.275 +/- 0.099888'   | 0.09765625 |
| Fp2-T3 Delta  | 0.19499 +/- 0.068755' | 0.23817 +/- 0.10332'  | 0.30078125 |
| Fp2-O1 Delta  | 0.21736 +/- 0.070945' | 0.25555 +/- 0.10617'  | 0.359375   |
| C4-O2 Delta   | 0.27375 +/- 0.198'    | 0.36913 +/- 0.23217'  | 0.49609375 |
| C4-T4 Delta   | 0.38064 +/- 0.27231'  | 0.35356 +/- 0.19108'  | 1          |
| C4-Fp1 Delta  | 0.25119 +/- 0.18678'  | 0.29053 +/- 0.10659'  | 0.30078125 |
| C4-C3 Delta   | 0.27845 +/- 0.24598'  | 0.34162 +/- 0.13116'  | 0.203125   |
| C4-T3 Delta   | 0.25597 +/- 0.24111'  | 0.28874 +/- 0.15294'  | 0.25       |
| C4-O1 Delta   | 0.24757 +/- 0.24862'  | 0.23867 +/- 0.09093'  | 0.30078125 |
| O2-T4 Delta   | 0.49469 +/- 0.26824'  | 0.35067 +/- 0.24107'  | 0.203125   |
| O2-Fp1 Delta  | 0.25313 +/- 0.14974'  | 0.26183 +/- 0.092159' | 0.30078125 |

|                |                      |                       |            |
|----------------|----------------------|-----------------------|------------|
| O2-C3 Delta    | 0.25584 +/- 0.23974' | 0.31377 +/- 0.13597'  | 0.12890625 |
| O2-T3 Delta    | 0.26421 +/- 0.21681' | 0.25199 +/- 0.14335'  | 0.8203125  |
| O2-O1 Delta    | 0.30735 +/- 0.21853' | 0.36149 +/- 0.16203'  | 0.49609375 |
| T4-Fp1 Delta   | 0.23313 +/- 0.16714' | 0.25588 +/- 0.098832' | 0.42578125 |
| T4-C3 Delta    | 0.24692 +/- 0.24394' | 0.28282 +/- 0.13776'  | 0.203125   |
| T4-T3 Delta    | 0.2704 +/- 0.23163'  | 0.28229 +/- 0.12105'  | 0.30078125 |
| T4-O1 Delta    | 0.24945 +/- 0.2363'  | 0.23857 +/- 0.1166'   | 0.42578125 |
| Fp1-C3 Delta   | 0.39746 +/- 0.20359' | 0.33413 +/- 0.12178'  | 0.5703125  |
| Fp1-T3 Delta   | 0.28757 +/- 0.16172' | 0.25534 +/- 0.11661'  | 1          |
| Fp1-O1 Delta   | 0.33271 +/- 0.17065' | 0.25521 +/- 0.0924'   | 0.49609375 |
| C3-T3 Delta    | 0.39404 +/- 0.24395' | 0.35617 +/- 0.21558'  | 0.91015625 |
| C3-O1 Delta    | 0.38998 +/- 0.26474' | 0.29129 +/- 0.15857'  | 0.49609375 |
| T3-O1 Delta    | 0.39759 +/- 0.23761' | 0.35889 +/- 0.23647'  | 0.65234375 |
| Fp2-C4 Gamma   | 0.29701 +/- 0.14952' | 0.38127 +/- 0.20789'  | 0.42578125 |
| Fp2-O2 Gamma   | 0.30599 +/- 0.18219' | 0.34242 +/- 0.19967'  | 0.734375   |
| Fp2-T4 Gamma   | 0.26523 +/- 0.18757' | 0.27039 +/- 0.16307'  | 0.8203125  |
| Fp2-Fp1 Gamma  | 0.31348 +/- 0.23787' | 0.23171 +/- 0.15786'  | 1          |
| Fp2-C3 Gamma   | 0.24117 +/- 0.16529' | 0.25352 +/- 0.1683'   | 1          |
| Fp2-T3 Gamma   | 0.20881 +/- 0.14586' | 0.18563 +/- 0.084138' | 0.91015625 |
| Fp2-O1 Gamma   | 0.23032 +/- 0.14994' | 0.21739 +/- 0.12311'  | 0.91015625 |
| C4-O2 Gamma    | 0.32693 +/- 0.20578' | 0.33671 +/- 0.14095'  | 0.91015625 |
| C4-T4 Gamma    | 0.47014 +/- 0.25557' | 0.40544 +/- 0.20904'  | 0.65234375 |
| C4-Fp1 Gamma   | 0.25291 +/- 0.20727' | 0.24208 +/- 0.15621'  | 0.8203125  |
| C4-C3 Gamma    | 0.29807 +/- 0.22248' | 0.29427 +/- 0.19081'  | 0.734375   |
| C4-T3 Gamma    | 0.23451 +/- 0.20803' | 0.19322 +/- 0.071853' | 0.91015625 |
| C4-O1 Gamma    | 0.27034 +/- 0.22834' | 0.25586 +/- 0.12924'  | 0.359375   |
| O2-T4 Gamma    | 0.37653 +/- 0.29106' | 0.35851 +/- 0.24281'  | 1          |
| O2-Fp1 Gamma   | 0.29704 +/- 0.21436' | 0.2099 +/- 0.065715'  | 0.49609375 |
| O2-C3 Gamma    | 0.2937 +/- 0.22059'  | 0.27039 +/- 0.17969'  | 1          |
| O2-T3 Gamma    | 0.24197 +/- 0.18273' | 0.22625 +/- 0.12394'  | 0.8203125  |
| O2-O1 Gamma    | 0.3526 +/- 0.22675'  | 0.36763 +/- 0.19165'  | 0.65234375 |
| T4-Fp1 Gamma   | 0.26349 +/- 0.22198' | 0.17655 +/- 0.051623' | 0.65234375 |
| T4-C3 Gamma    | 0.24723 +/- 0.22796' | 0.21022 +/- 0.14394'  | 0.8203125  |
| T4-T3 Gamma    | 0.25569 +/- 0.2226'  | 0.21486 +/- 0.10027'  | 1          |
| T4-O1 Gamma    | 0.2546 +/- 0.19428'  | 0.22623 +/- 0.10765'  | 0.65234375 |
| Fp1-C3 Gamma   | 0.27814 +/- 0.19572' | 0.27847 +/- 0.14423'  | 0.91015625 |
| Fp1-T3 Gamma   | 0.23976 +/- 0.18735' | 0.1983 +/- 0.031997'  | 0.91015625 |
| Fp1-O1 Gamma   | 0.2709 +/- 0.19947'  | 0.22734 +/- 0.040902' | 0.91015625 |
| C3-T3 Gamma    | 0.45628 +/- 0.26072' | 0.5295 +/- 0.16844'   | 0.42578125 |
| C3-O1 Gamma    | 0.37106 +/- 0.23455' | 0.33676 +/- 0.20308'  | 0.65234375 |
| T3-O1 Gamma    | 0.40525 +/- 0.18309' | 0.33567 +/- 0.1484'   | 0.49609375 |
| Fp2-C4 Overall | 0.32037 +/- 0.13853' | 0.37512 +/- 0.17018'  | 0.8203125  |
| Fp2-O2 Overall | 0.3057 +/- 0.14717'  | 0.3595 +/- 0.16046'   | 0.65234375 |

|                 |                      |                       |            |
|-----------------|----------------------|-----------------------|------------|
| Fp2-T4 Overall  | 0.28277 +/- 0.17061' | 0.28749 +/- 0.16097'  | 1          |
| Fp2-Fp1 Overall | 0.34569 +/- 0.19498' | 0.31501 +/- 0.2122'   | 1          |
| Fp2-C3 Overall  | 0.26211 +/- 0.15499' | 0.3057 +/- 0.20421'   | 0.65234375 |
| Fp2-T3 Overall  | 0.24555 +/- 0.12504' | 0.26276 +/- 0.14748'  | 0.734375   |
| Fp2-O1 Overall  | 0.25406 +/- 0.12752' | 0.2834 +/- 0.14961'   | 0.42578125 |
| C4-O2 Overall   | 0.33461 +/- 0.1799'  | 0.37566 +/- 0.15939'  | 0.734375   |
| C4-T4 Overall   | 0.44938 +/- 0.20759' | 0.41274 +/- 0.14204'  | 0.8203125  |
| C4-Fp1 Overall  | 0.28808 +/- 0.19071' | 0.2757 +/- 0.16829'   | 1          |
| C4-C3 Overall   | 0.33706 +/- 0.22075' | 0.32477 +/- 0.19284'  | 1          |
| C4-T3 Overall   | 0.28804 +/- 0.20593' | 0.25515 +/- 0.13333'  | 1          |
| C4-O1 Overall   | 0.30301 +/- 0.21602' | 0.28093 +/- 0.13939'  | 0.65234375 |
| O2-T4 Overall   | 0.44992 +/- 0.25961' | 0.39641 +/- 0.2121'   | 0.8203125  |
| O2-Fp1 Overall  | 0.3215 +/- 0.20927'  | 0.27378 +/- 0.099554' | 0.91015625 |
| O2-C3 Overall   | 0.32003 +/- 0.22882' | 0.30848 +/- 0.20679'  | 0.91015625 |
| O2-T3 Overall   | 0.28861 +/- 0.18524' | 0.2839 +/- 0.159'     | 0.65234375 |
| O2-O1 Overall   | 0.37464 +/- 0.22163' | 0.40015 +/- 0.1752'   | 0.203125   |
| T4-Fp1 Overall  | 0.29601 +/- 0.22197' | 0.24623 +/- 0.11419'  | 0.734375   |
| T4-C3 Overall   | 0.27987 +/- 0.25224' | 0.25229 +/- 0.17248'  | 0.734375   |
| T4-T3 Overall   | 0.29054 +/- 0.22619' | 0.26896 +/- 0.12821'  | 0.91015625 |
| T4-O1 Overall   | 0.28004 +/- 0.19697' | 0.2784 +/- 0.14173'   | 1          |
| Fp1-C3 Overall  | 0.36781 +/- 0.18441' | 0.33954 +/- 0.14978'  | 0.5703125  |
| Fp1-T3 Overall  | 0.2958 +/- 0.18691'  | 0.26092 +/- 0.096722' | 0.734375   |
| Fp1-O1 Overall  | 0.33653 +/- 0.19107' | 0.30422 +/- 0.1042'   | 0.8203125  |
| C3-T3 Overall   | 0.49174 +/- 0.19806' | 0.50115 +/- 0.12092'  | 0.91015625 |
| C3-O1 Overall   | 0.40603 +/- 0.20104' | 0.35397 +/- 0.20924'  | 0.49609375 |
| T3-O1 Overall   | 0.44955 +/- 0.15809' | 0.41007 +/- 0.15415'  | 0.5703125  |

**Table S13.** Overall power and power within each band at each electrode location, responders vs. nonresponders at 12 months.

| <b>Band</b> | <b>Responder</b>    | <b>Nonresponder</b> | <b><i>p</i></b> |
|-------------|---------------------|---------------------|-----------------|
| Fp2 Theta   | 3.8657 +/- 11.3529  | 4.9465 +/- 12.7688  | 0.9047619048    |
| Fp2 Alpha   | 3.104 +/- 8.3952    | 4.0413 +/- 9.7008   | 0.9047619048    |
| Fp2 Beta    | 2.596 +/- 5.9794    | 3.1583 +/- 6.3109   | 1               |
| Fp2 Delta   | 4.3727 +/- 13.546   | 5.9244 +/- 15.46    | 0.9047619048    |
| Fp2 Gamma   | 1.3789 +/- 0.34836  | 0.85194 +/- 1.0288  | 0.5555555556    |
| Fp2 Overall | -2.2322 +/- 4.4446  | -0.66245 +/- 5.2259 | 0.5555555556    |
| C4 Theta    | -0.34696 +/- 6.0526 | 8.8903 +/- 15.0659  | 0.5555555556    |
| C4 Alpha    | -0.1919 +/- 4.9954  | 7.2162 +/- 10.9923  | 0.4126984127    |
| C4 Beta     | 0.14758 +/- 3.4796  | 4.5264 +/- 7.663    | 0.5555555556    |
| C4 Delta    | -0.5074 +/- 6.8441  | 10.1087 +/- 18.4151 | 0.5555555556    |
| C4 Gamma    | 1.2924 +/- 0.37144  | 0.24782 +/- 1.1533  | 0.1904761905    |
| C4 Overall  | -1.3641 +/- 6.0767  | 2.3196 +/- 4.4499   | 0.4126984127    |
| T4 Theta    | -0.60906 +/- 6.3015 | 2.6268 +/- 10.8113  | 0.5555555556    |

|                |                      |                      |               |
|----------------|----------------------|----------------------|---------------|
| T4 Alpha       | -0.37583 +/- 4.99    | 2.1475 +/- 8.5243    | 0.5555555556  |
| T4 Beta        | 0.16218 +/- 3.5644   | 1.3171 +/- 7.2477    | 0.5555555556  |
| T4 Delta       | -0.98192 +/- 7.3908  | 2.9434 +/- 13.3124   | 0.5555555556  |
| T4 Gamma       | 1.0889 +/- 0.24756   | 0.7237 +/- 0.74393   | 0.7301587302  |
| T4 Overall     | -1.8243 +/- 6.6757   | 2.7367 +/- 3.5957    | 0.4126984127  |
| O2 Theta       | 10.9437 +/- 18.4557  | -10.9494 +/- 15.3236 | 0.06349206349 |
| O2 Alpha       | 8.5616 +/- 13.9509   | -8.5268 +/- 12.2066  | 0.06349206349 |
| O2 Beta        | 6.4333 +/- 10.0916   | -6.5159 +/- 9.562    | 0.06349206349 |
| O2 Delta       | 12.1761 +/- 20.5025  | -12.0872 +/- 16.4235 | 0.06349206349 |
| O2 Gamma       | 1.0838 +/- 0.2601    | 0.99295 +/- 0.25663  | 0.5555555556  |
| O2 Overall     | -2.1098 +/- 6.5643   | 0.5297 +/- 4.5975    | 0.9047619048  |
| Fp1 Theta      | -7.3688 +/- 16.9548  | -3.4871 +/- 12.9186  | 0.9047619048  |
| Fp1 Alpha      | -5.2204 +/- 12.6937  | -2.5462 +/- 9.6418   | 0.9047619048  |
| Fp1 Beta       | -3.2896 +/- 8.97     | -0.98705 +/- 7.3066  | 0.9047619048  |
| Fp1 Delta      | -9.16 +/- 20.5449    | -3.4155 +/- 16.0033  | 0.9047619048  |
| Fp1 Gamma      | 1.3407 +/- 0.48565   | 1.3761 +/- 0.30743   | 1             |
| Fp1 Overall    | -2.5223 +/- 3.4678   | -1.4558 +/- 1.9731   | 0.7301587302  |
| C3 Theta       | -2.3408 +/- 19.5204  | -0.54243 +/- 10.2505 | 1             |
| C3 Alpha       | -1.4812 +/- 14.7974  | -0.2544 +/- 7.733    | 1             |
| C3 Beta        | -0.97314 +/- 10.6706 | 0.87095 +/- 5.804    | 1             |
| C3 Delta       | -2.8848 +/- 22.3382  | -0.0668 +/- 12.2378  | 1             |
| C3 Gamma       | 1.644 +/- 0.78412    | 1.7471 +/- 0.63414   | 1             |
| C3 Overall     | -2.159 +/- 4.504     | 3.4797 +/- 3.6792    | 0.1111111111  |
| T3 Theta       | 8.6691 +/- 12.834    | -0.4037 +/- 10.2829  | 0.7301587302  |
| T3 Alpha       | 6.8175 +/- 9.8663    | -0.024125 +/- 7.648  | 0.7301587302  |
| T3 Beta        | 5.9278 +/- 7.8818    | 0.7377 +/- 6.1507    | 0.7301587302  |
| T3 Delta       | 9.848 +/- 15.0373    | -0.37955 +/- 12.7168 | 0.9047619048  |
| T3 Gamma       | 1.6113 +/- 0.47253   | 1.6679 +/- 0.52993   | 1             |
| T3 Overall     | -0.36397 +/- 7.7151  | 4.7502 +/- 5.5424    | 0.2857142857  |
| O1 Theta       | 14.8945 +/- 25.5207  | -17.1496 +/- 24.1692 | 0.1111111111  |
| O1 Alpha       | 11.2409 +/- 18.7955  | -12.5911 +/- 18.3045 | 0.1111111111  |
| O1 Beta        | 8.9828 +/- 14.4332   | -9.0374 +/- 13.285   | 0.1111111111  |
| O1 Delta       | 17.287 +/- 30.8961   | -21.1198 +/- 30.156  | 0.1111111111  |
| O1 Gamma       | 1.3979 +/- 0.36646   | 1.9103 +/- 1.6757    | 1             |
| O1 Overall     | -0.52584 +/- 7.7886  | 0.75636 +/- 4.971    | 1             |
| R hemi Theta   | 3.4634 +/- 8.9092    | 1.3786 +/- 6.5691    | 0.9047619048  |
| R hemi Alpha   | 2.7743 +/- 6.7552    | 1.2196 +/- 4.845     | 0.9047619048  |
| R hemi Beta    | 2.3347 +/- 4.8785    | 0.6215 +/- 3.678     | 0.9047619048  |
| R hemi Delta   | 3.7649 +/- 10.0688   | 1.7222 +/- 8.3678    | 0.7301587302  |
| R hemi Gamma   | 1.211 +/- 0.22515    | 0.70408 +/- 0.58203  | 0.1111111111  |
| R hemi Overall | -1.8826 +/- 5.0924   | 1.2309 +/- 4.3236    | 0.7301587302  |
| L hemi Theta   | 3.4635 +/- 5.7659    | -5.3956 +/- 9.3932   | 0.2857142857  |
| L hemi Alpha   | 2.8392 +/- 4.4764    | -3.854 +/- 7.1053    | 0.2857142857  |



|                 |                    |                     |              |
|-----------------|--------------------|---------------------|--------------|
| L hemi Beta     | 2.662 +/- 3.3407   | -2.104 +/- 5.3071   | 0.2857142857 |
| L hemi Delta    | 3.7725 +/- 7.1742  | -6.2453 +/- 11.5987 | 0.4126984127 |
| L hemi Gamma    | 1.4984 +/- 0.3399  | 1.6753 +/- 0.40856  | 0.5555555556 |
| L hemi Overall  | -1.3928 +/- 5.7513 | 1.8826 +/- 3.852    | 0.4126984127 |
| Overall Theta   | 3.4633 +/- 6.0901  | -2.0086 +/- 4.7534  | 0.1904761905 |
| Overall Alpha   | 2.8068 +/- 4.7558  | -1.3172 +/- 3.6127  | 0.1904761905 |
| Overall Beta    | 2.4984 +/- 3.443   | -0.74125 +/- 2.8251 | 0.1111111111 |
| Overall Delta   | 3.7687 +/- 6.852   | -2.2615 +/- 5.8483  | 0.2857142857 |
| Overall Gamma   | 1.3547 +/- 0.24039 | 1.1897 +/- 0.35202  | 0.5555555556 |
| Overall Overall | -1.6377 +/- 5.2614 | 1.5567 +/- 3.8295   | 0.7301587302 |

**Table S14.** Hemispheric asymmetry, overall and within each band, responders vs. nonresponders at 12 months.

| <b>Band</b>       | <b>Responder</b>     | <b>Nonresponder</b>  | <b><i>p</i></b> |
|-------------------|----------------------|----------------------|-----------------|
| Frontal Theta     | -11.2346 +/- 26.1697 | -8.4338 +/- 18.4022  | 0.9047619048    |
| Frontal Alpha     | -8.3244 +/- 19.3682  | -6.5874 +/- 13.8776  | 0.9047619048    |
| Frontal Beta      | -5.8856 +/- 13.7635  | -4.1454 +/- 9.5249   | 0.9047619048    |
| Frontal Delta     | -13.5328 +/- 31.4547 | -9.3395 +/- 22.4963  | 0.7301587302    |
| Frontal Gamma     | -0.03826 +/- 0.52048 | 0.52416 +/- 0.91088  | 0.7301587302    |
| Frontal Overall   | -0.2901 +/- 1.5279   | -0.79327 +/- 3.7533  | 1               |
| Parietal Theta    | -1.9938 +/- 16.026   | -9.4331 +/- 24.2982  | 0.7301587302    |
| Parietal Alpha    | -1.2894 +/- 12.2404  | -7.4707 +/- 17.9548  | 0.5555555556    |
| Parietal Beta     | -1.1207 +/- 9.1235   | -3.6556 +/- 12.8365  | 0.7301587302    |
| Parietal Delta    | -2.3774 +/- 18.1687  | -10.1756 +/- 29.4525 | 0.7301587302    |
| Parietal Gamma    | 0.35159 +/- 0.49374  | 1.4993 +/- 1.7108    | 0.9047619048    |
| Parietal Overall  | -0.79492 +/- 3.6136  | 1.1601 +/- 3.6654    | 0.4126984127    |
| Temporal Theta    | 9.2781 +/- 9.1192    | -3.0304 +/- 19.152   | 0.2857142857    |
| Temporal Alpha    | 7.1934 +/- 7.1135    | -2.1717 +/- 14.7077  | 0.2857142857    |
| Temporal Beta     | 5.7657 +/- 5.7858    | -0.57939 +/- 12.2108 | 0.2857142857    |
| Temporal Delta    | 10.8299 +/- 10.7306  | -3.3228 +/- 23.7859  | 0.2857142857    |
| Temporal Gamma    | 0.52237 +/- 0.51869  | 0.94422 +/- 1.264    | 1               |
| Temporal Overall  | 1.4604 +/- 6.9764    | 2.0134 +/- 3.7288    | 0.4126984127    |
| Occipital Theta   | 3.9507 +/- 29.0482   | -6.2003 +/- 29.42    | 0.9047619048    |
| Occipital Alpha   | 2.6794 +/- 21.3236   | -4.0643 +/- 22.5128  | 1               |
| Occipital Beta    | 2.5494 +/- 16.3704   | -2.5218 +/- 16.6737  | 0.7301587302    |
| Occipital Delta   | 5.1111 +/- 34.6302   | -9.0326 +/- 34.9297  | 0.9047619048    |
| Occipital Gamma   | 0.31409 +/- 0.47707  | 0.91735 +/- 1.7768   | 0.9047619048    |
| Occipital Overall | 1.584 +/- 4.6037     | 0.22664 +/- 1.9977   | 0.7301587302    |
| Overall Theta     | 0.00076 +/- 35.0701  | -27.097 +/- 52.5198  | 0.5555555556    |
| Overall Alpha     | 0.25882 +/- 25.5736  | -20.2942 +/- 39.1326 | 0.5555555556    |
| Overall Beta      | 1.3089 +/- 18.976    | -10.902 +/- 28.6945  | 0.5555555556    |
| Overall Delta     | 0.03098 +/- 43.4317  | -31.8702 +/- 66.0044 | 0.5555555556    |
| Overall Gamma     | 1.1498 +/- 1.2729    | 3.885 +/- 2.8727     | 0.2857142857    |

|                 |                    |                    |              |
|-----------------|--------------------|--------------------|--------------|
| Overall Overall | 1.9592 +/- 10.8017 | 2.6071 +/- 11.5941 | 0.9047619048 |
|-----------------|--------------------|--------------------|--------------|

**Table S15.** Inter-electrode coherence measures in the overall spectrum, responders vs. nonresponders at 12 months.

| <b>Band</b>   | <b>Responder</b>     | <b>Nonresponder</b>  | <b><i>p</i></b> |
|---------------|----------------------|----------------------|-----------------|
| Fp2-C4 Theta  | 0.39189 +/- 0.20646  | 0.60747 +/- 0.40075  | 0.5555555556    |
| Fp2-O2 Theta  | 0.43168 +/- 0.26609  | 0.53265 +/- 0.31766  | 0.7301587302    |
| Fp2-T4 Theta  | 0.2564 +/- 0.089608  | 0.38307 +/- 0.32492  | 0.7301587302    |
| Fp2-Fp1 Theta | 0.34868 +/- 0.23182  | 0.47323 +/- 0.33044  | 0.5555555556    |
| Fp2-C3 Theta  | 0.2517 +/- 0.10461   | 0.28692 +/- 0.12025  | 0.9047619048    |
| Fp2-T3 Theta  | 0.21684 +/- 0.08327  | 0.29378 +/- 0.11993  | 0.4126984127    |
| Fp2-O1 Theta  | 0.2555 +/- 0.1474    | 0.38688 +/- 0.20081  | 0.2857142857    |
| C4-O2 Theta   | 0.39538 +/- 0.17656  | 0.41707 +/- 0.31601  | 0.9047619048    |
| C4-T4 Theta   | 0.3817 +/- 0.28597   | 0.57069 +/- 0.38223  | 0.5555555556    |
| C4-Fp1 Theta  | 0.2776 +/- 0.029325  | 0.36149 +/- 0.050619 | 0.03174603175   |
| C4-C3 Theta   | 0.25935 +/- 0.040367 | 0.27828 +/- 0.17915  | 0.4126984127    |
| C4-T3 Theta   | 0.23034 +/- 0.035664 | 0.23375 +/- 0.16069  | 0.9047619048    |
| C4-O1 Theta   | 0.22474 +/- 0.031261 | 0.25968 +/- 0.13657  | 0.2857142857    |
| O2-T4 Theta   | 0.47536 +/- 0.25877  | 0.3372 +/- 0.10966   | 0.4126984127    |
| O2-Fp1 Theta  | 0.34829 +/- 0.17177  | 0.40371 +/- 0.19789  | 0.7301587302    |
| O2-C3 Theta   | 0.29595 +/- 0.12489  | 0.25754 +/- 0.10075  | 0.9047619048    |
| O2-T3 Theta   | 0.32423 +/- 0.097771 | 0.29314 +/- 0.11876  | 0.7301587302    |
| O2-O1 Theta   | 0.35755 +/- 0.14161  | 0.41593 +/- 0.2825   | 1               |
| T4-Fp1 Theta  | 0.21336 +/- 0.065209 | 0.29858 +/- 0.089746 | 0.1904761905    |
| T4-C3 Theta   | 0.26677 +/- 0.087389 | 0.19454 +/- 0.16083  | 0.4126984127    |
| T4-T3 Theta   | 0.29191 +/- 0.089614 | 0.23502 +/- 0.1688   | 0.9047619048    |
| T4-O1 Theta   | 0.30234 +/- 0.14474  | 0.25861 +/- 0.15355  | 0.9047619048    |
| Fp1-C3 Theta  | 0.36596 +/- 0.19502  | 0.38594 +/- 0.12689  | 1               |
| Fp1-T3 Theta  | 0.28806 +/- 0.096195 | 0.36147 +/- 0.11969  | 0.2857142857    |
| Fp1-O1 Theta  | 0.35047 +/- 0.23796  | 0.47441 +/- 0.28475  | 0.7301587302    |
| C3-T3 Theta   | 0.3114 +/- 0.10374   | 0.49072 +/- 0.2414   | 0.06349206349   |
| C3-O1 Theta   | 0.28603 +/- 0.063134 | 0.279 +/- 0.17962    | 0.9047619048    |
| T3-O1 Theta   | 0.49489 +/- 0.1805   | 0.51894 +/- 0.33881  | 0.5555555556    |
| Fp2-C4 Alpha  | 0.36625 +/- 0.18193  | 0.56095 +/- 0.43392  | 0.5555555556    |
| Fp2-O2 Alpha  | 0.42029 +/- 0.25684  | 0.49609 +/- 0.27989  | 0.7301587302    |
| Fp2-T4 Alpha  | 0.27659 +/- 0.09946  | 0.3236 +/- 0.26422   | 0.9047619048    |
| Fp2-Fp1 Alpha | 0.31441 +/- 0.20616  | 0.45209 +/- 0.28102  | 0.5555555556    |
| Fp2-C3 Alpha  | 0.2099 +/- 0.066998  | 0.27031 +/- 0.15892  | 0.7301587302    |
| Fp2-T3 Alpha  | 0.21585 +/- 0.083784 | 0.30288 +/- 0.15038  | 0.4126984127    |
| Fp2-O1 Alpha  | 0.25831 +/- 0.13838  | 0.36366 +/- 0.1084   | 0.2857142857    |
| C4-O2 Alpha   | 0.39172 +/- 0.19328  | 0.41789 +/- 0.30091  | 0.9047619048    |
| C4-T4 Alpha   | 0.38881 +/- 0.3103   | 0.48532 +/- 0.39903  | 1               |
| C4-Fp1 Alpha  | 0.24815 +/- 0.049935 | 0.32227 +/- 0.15108  | 0.5555555556    |

---

|              |                      |                     |              |
|--------------|----------------------|---------------------|--------------|
| C4-C3 Alpha  | 0.23441 +/- 0.039579 | 0.27303 +/- 0.18997 | 0.4126984127 |
| C4-T3 Alpha  | 0.20247 +/- 0.041688 | 0.25257 +/- 0.20077 | 0.9047619048 |
| C4-O1 Alpha  | 0.22556 +/- 0.066994 | 0.27851 +/- 0.17778 | 0.7301587302 |
| O2-T4 Alpha  | 0.4057 +/- 0.28415   | 0.38523 +/- 0.16048 | 0.9047619048 |
| O2-Fp1 Alpha | 0.31989 +/- 0.13481  | 0.35175 +/- 0.11578 | 0.7301587302 |
| O2-C3 Alpha  | 0.27142 +/- 0.07489  | 0.24495 +/- 0.13186 | 0.7301587302 |
| O2-T3 Alpha  | 0.28312 +/- 0.095894 | 0.29869 +/- 0.12124 | 0.7301587302 |
| O2-O1 Alpha  | 0.37274 +/- 0.15969  | 0.40653 +/- 0.19401 | 0.9047619048 |
| T4-Fp1 Alpha | 0.23006 +/- 0.047833 | 0.27368 +/- 0.1679  | 1            |
| T4-C3 Alpha  | 0.24659 +/- 0.064602 | 0.19632 +/- 0.19604 | 0.2857142857 |
| T4-T3 Alpha  | 0.281 +/- 0.12437    | 0.25189 +/- 0.19865 | 0.9047619048 |
| T4-O1 Alpha  | 0.33072 +/- 0.19631  | 0.28415 +/- 0.19988 | 0.9047619048 |
| Fp1-C3 Alpha | 0.3953 +/- 0.15485   | 0.41209 +/- 0.1463  | 0.7301587302 |
| Fp1-T3 Alpha | 0.26897 +/- 0.069314 | 0.41613 +/- 0.15398 | 0.1904761905 |
| Fp1-O1 Alpha | 0.33132 +/- 0.21731  | 0.41537 +/- 0.26305 | 0.9047619048 |
| C3-T3 Alpha  | 0.35761 +/- 0.11242  | 0.51971 +/- 0.26805 | 0.5555555556 |
| C3-O1 Alpha  | 0.3251 +/- 0.12057   | 0.30131 +/- 0.22635 | 0.7301587302 |
| T3-O1 Alpha  | 0.52983 +/- 0.23275  | 0.54297 +/- 0.35921 | 0.9047619048 |
| Fp2-C4 Beta  | 0.3223 +/- 0.10495   | 0.53282 +/- 0.38936 | 0.9047619048 |
| Fp2-O2 Beta  | 0.39226 +/- 0.19332  | 0.46458 +/- 0.28989 | 0.9047619048 |
| Fp2-T4 Beta  | 0.30891 +/- 0.16446  | 0.22819 +/- 0.1499  | 0.1904761905 |
| Fp2-Fp1 Beta | 0.35547 +/- 0.1765   | 0.37015 +/- 0.14657 | 0.9047619048 |
| Fp2-C3 Beta  | 0.25681 +/- 0.10861  | 0.2727 +/- 0.16821  | 0.9047619048 |
| Fp2-T3 Beta  | 0.29328 +/- 0.12637  | 0.28742 +/- 0.17773 | 1            |
| Fp2-O1 Beta  | 0.3062 +/- 0.14688   | 0.31725 +/- 0.15555 | 1            |
| C4-O2 Beta   | 0.37726 +/- 0.1685   | 0.41018 +/- 0.29112 | 1            |
| C4-T4 Beta   | 0.44055 +/- 0.30728  | 0.45719 +/- 0.35653 | 0.9047619048 |
| C4-Fp1 Beta  | 0.26304 +/- 0.070382 | 0.31956 +/- 0.12691 | 0.7301587302 |
| C4-C3 Beta   | 0.23081 +/- 0.089332 | 0.28066 +/- 0.18901 | 0.5555555556 |
| C4-T3 Beta   | 0.22386 +/- 0.059671 | 0.25343 +/- 0.19342 | 0.7301587302 |
| C4-O1 Beta   | 0.25784 +/- 0.083178 | 0.28559 +/- 0.17468 | 1            |
| O2-T4 Beta   | 0.41007 +/- 0.26326  | 0.4014 +/- 0.1653   | 0.9047619048 |
| O2-Fp1 Beta  | 0.30325 +/- 0.13055  | 0.29575 +/- 0.13138 | 1            |
| O2-C3 Beta   | 0.32203 +/- 0.12309  | 0.25791 +/- 0.13733 | 0.7301587302 |
| O2-T3 Beta   | 0.35973 +/- 0.18253  | 0.28418 +/- 0.12141 | 0.7301587302 |
| O2-O1 Beta   | 0.41423 +/- 0.17017  | 0.38011 +/- 0.11121 | 0.9047619048 |
| T4-Fp1 Beta  | 0.27183 +/- 0.10335  | 0.22378 +/- 0.136   | 0.4126984127 |
| T4-C3 Beta   | 0.28494 +/- 0.11859  | 0.18523 +/- 0.19167 | 0.4126984127 |
| T4-T3 Beta   | 0.30965 +/- 0.1582   | 0.22134 +/- 0.18614 | 0.5555555556 |
| T4-O1 Beta   | 0.33997 +/- 0.22492  | 0.24491 +/- 0.16904 | 0.4126984127 |
| Fp1-C3 Beta  | 0.36891 +/- 0.14928  | 0.48132 +/- 0.13391 | 0.2857142857 |
| Fp1-T3 Beta  | 0.3052 +/- 0.14246   | 0.4526 +/- 0.19256  | 0.1904761905 |
| Fp1-O1 Beta  | 0.38928 +/- 0.19453  | 0.40465 +/- 0.27978 | 1            |

---

---

|               |                      |                      |              |
|---------------|----------------------|----------------------|--------------|
| C3-T3 Beta    | 0.3713 +/- 0.18892   | 0.64923 +/- 0.19763  | 0.1111111111 |
| C3-O1 Beta    | 0.33426 +/- 0.10967  | 0.35166 +/- 0.23244  | 0.9047619048 |
| T3-O1 Beta    | 0.53416 +/- 0.23493  | 0.50958 +/- 0.40652  | 0.9047619048 |
| Fp2-C4 Delta  | 0.39825 +/- 0.19215  | 0.58568 +/- 0.34139  | 0.4126984127 |
| Fp2-O2 Delta  | 0.44475 +/- 0.27564  | 0.4923 +/- 0.22808   | 0.7301587302 |
| Fp2-T4 Delta  | 0.24166 +/- 0.1002   | 0.41087 +/- 0.36572  | 0.5555555556 |
| Fp2-Fp1 Delta | 0.34554 +/- 0.2018   | 0.46035 +/- 0.30367  | 0.5555555556 |
| Fp2-C3 Delta  | 0.22195 +/- 0.076651 | 0.28388 +/- 0.11008  | 0.4126984127 |
| Fp2-T3 Delta  | 0.20314 +/- 0.084518 | 0.30269 +/- 0.10509  | 0.1904761905 |
| Fp2-O1 Delta  | 0.26448 +/- 0.13318  | 0.38584 +/- 0.20665  | 0.4126984127 |
| C4-O2 Delta   | 0.39198 +/- 0.18474  | 0.43058 +/- 0.14122  | 0.9047619048 |
| C4-T4 Delta   | 0.31888 +/- 0.27356  | 0.69981 +/- 0.34142  | 0.1904761905 |
| C4-Fp1 Delta  | 0.31084 +/- 0.079638 | 0.32504 +/- 0.096868 | 0.5555555556 |
| C4-C3 Delta   | 0.24692 +/- 0.044864 | 0.26381 +/- 0.16688  | 0.4126984127 |
| C4-T3 Delta   | 0.22235 +/- 0.065277 | 0.27068 +/- 0.17625  | 0.4126984127 |
| C4-O1 Delta   | 0.22983 +/- 0.076457 | 0.30877 +/- 0.18105  | 0.5555555556 |
| O2-T4 Delta   | 0.43481 +/- 0.28221  | 0.3596 +/- 0.09603   | 1            |
| O2-Fp1 Delta  | 0.36625 +/- 0.15722  | 0.38745 +/- 0.23295  | 1            |
| O2-C3 Delta   | 0.25367 +/- 0.046926 | 0.25437 +/- 0.095729 | 0.7301587302 |
| O2-T3 Delta   | 0.24775 +/- 0.081256 | 0.28847 +/- 0.11286  | 0.5555555556 |
| O2-O1 Delta   | 0.29125 +/- 0.14746  | 0.38505 +/- 0.23596  | 0.7301587302 |
| T4-Fp1 Delta  | 0.21259 +/- 0.085294 | 0.27482 +/- 0.095729 | 0.4126984127 |
| T4-C3 Delta   | 0.2622 +/- 0.08417   | 0.19151 +/- 0.12979  | 0.5555555556 |
| T4-T3 Delta   | 0.23531 +/- 0.091507 | 0.22411 +/- 0.17654  | 0.9047619048 |
| T4-O1 Delta   | 0.32813 +/- 0.15812  | 0.25332 +/- 0.17607  | 0.4126984127 |
| Fp1-C3 Delta  | 0.33243 +/- 0.15891  | 0.38712 +/- 0.06413  | 0.5555555556 |
| Fp1-T3 Delta  | 0.24717 +/- 0.091762 | 0.32216 +/- 0.081127 | 0.2857142857 |
| Fp1-O1 Delta  | 0.4155 +/- 0.25055   | 0.39497 +/- 0.28594  | 1            |
| C3-T3 Delta   | 0.29516 +/- 0.097694 | 0.50791 +/- 0.24669  | 0.2857142857 |
| C3-O1 Delta   | 0.29824 +/- 0.099571 | 0.27907 +/- 0.10411  | 0.9047619048 |
| T3-O1 Delta   | 0.41248 +/- 0.14233  | 0.46009 +/- 0.3201   | 0.7301587302 |
| Fp2-C4 Gamma  | 0.31542 +/- 0.11528  | 0.61934 +/- 0.34567  | 0.2857142857 |
| Fp2-O2 Gamma  | 0.35902 +/- 0.14631  | 0.4322 +/- 0.27486   | 0.9047619048 |
| Fp2-T4 Gamma  | 0.34358 +/- 0.25162  | 0.25682 +/- 0.12665  | 0.7301587302 |
| Fp2-Fp1 Gamma | 0.42766 +/- 0.27252  | 0.33531 +/- 0.17359  | 0.7301587302 |
| Fp2-C3 Gamma  | 0.33024 +/- 0.19229  | 0.291 +/- 0.15771    | 1            |
| Fp2-T3 Gamma  | 0.33716 +/- 0.20653  | 0.28937 +/- 0.17015  | 0.9047619048 |
| Fp2-O1 Gamma  | 0.37175 +/- 0.24694  | 0.30075 +/- 0.16812  | 1            |
| C4-O2 Gamma   | 0.38104 +/- 0.16435  | 0.42233 +/- 0.23993  | 0.9047619048 |
| C4-T4 Gamma   | 0.4496 +/- 0.30536   | 0.50761 +/- 0.33928  | 0.7301587302 |
| C4-Fp1 Gamma  | 0.28689 +/- 0.092076 | 0.34313 +/- 0.15522  | 0.5555555556 |
| C4-C3 Gamma   | 0.28662 +/- 0.14303  | 0.28977 +/- 0.18853  | 0.9047619048 |
| C4-T3 Gamma   | 0.26079 +/- 0.089085 | 0.27574 +/- 0.19114  | 0.7301587302 |

---

---

|                 |                      |                      |               |
|-----------------|----------------------|----------------------|---------------|
| C4-O1 Gamma     | 0.26634 +/- 0.093518 | 0.30632 +/- 0.15242  | 0.5555555556  |
| O2-T4 Gamma     | 0.39952 +/- 0.22959  | 0.37093 +/- 0.10553  | 0.9047619048  |
| O2-Fp1 Gamma    | 0.30669 +/- 0.10708  | 0.28917 +/- 0.15016  | 0.7301587302  |
| O2-C3 Gamma     | 0.28336 +/- 0.063979 | 0.26372 +/- 0.13434  | 1             |
| O2-T3 Gamma     | 0.28583 +/- 0.073525 | 0.27378 +/- 0.12698  | 1             |
| O2-O1 Gamma     | 0.37192 +/- 0.17522  | 0.39912 +/- 0.022795 | 0.2857142857  |
| T4-Fp1 Gamma    | 0.30667 +/- 0.23849  | 0.21915 +/- 0.13121  | 0.4126984127  |
| T4-C3 Gamma     | 0.31642 +/- 0.2135   | 0.17931 +/- 0.14915  | 0.4126984127  |
| T4-T3 Gamma     | 0.32307 +/- 0.21318  | 0.19698 +/- 0.14633  | 0.4126984127  |
| T4-O1 Gamma     | 0.35248 +/- 0.27978  | 0.23462 +/- 0.116    | 0.5555555556  |
| Fp1-C3 Gamma    | 0.34452 +/- 0.19501  | 0.62028 +/- 0.18821  | 0.1111111111  |
| Fp1-T3 Gamma    | 0.36943 +/- 0.19638  | 0.5347 +/- 0.12464   | 0.2857142857  |
| Fp1-O1 Gamma    | 0.44776 +/- 0.23673  | 0.45728 +/- 0.26944  | 1             |
| C3-T3 Gamma     | 0.35793 +/- 0.1924   | 0.70889 +/- 0.21735  | 0.06349206349 |
| C3-O1 Gamma     | 0.4019 +/- 0.22381   | 0.40437 +/- 0.23373  | 1             |
| T3-O1 Gamma     | 0.5506 +/- 0.27072   | 0.47882 +/- 0.40023  | 0.7301587302  |
| Fp2-C4 Overall  | 0.34574 +/- 0.13748  | 0.59586 +/- 0.32355  | 0.2857142857  |
| Fp2-O2 Overall  | 0.39222 +/- 0.14556  | 0.42571 +/- 0.22189  | 0.9047619048  |
| Fp2-T4 Overall  | 0.3087 +/- 0.16226   | 0.28476 +/- 0.16416  | 0.5555555556  |
| Fp2-Fp1 Overall | 0.43131 +/- 0.23594  | 0.36016 +/- 0.15118  | 0.5555555556  |
| Fp2-C3 Overall  | 0.31802 +/- 0.14325  | 0.26409 +/- 0.13956  | 0.5555555556  |
| Fp2-T3 Overall  | 0.2951 +/- 0.13719   | 0.30393 +/- 0.1766   | 1             |
| Fp2-O1 Overall  | 0.35577 +/- 0.14651  | 0.33758 +/- 0.15097  | 1             |
| C4-O2 Overall   | 0.36815 +/- 0.14191  | 0.40397 +/- 0.2176   | 0.9047619048  |
| C4-T4 Overall   | 0.4088 +/- 0.25615   | 0.51003 +/- 0.32043  | 0.5555555556  |
| C4-Fp1 Overall  | 0.30741 +/- 0.089919 | 0.32432 +/- 0.094344 | 0.9047619048  |
| C4-C3 Overall   | 0.2928 +/- 0.11894   | 0.28358 +/- 0.18257  | 0.9047619048  |
| C4-T3 Overall   | 0.26209 +/- 0.050105 | 0.28948 +/- 0.21297  | 1             |
| C4-O1 Overall   | 0.28157 +/- 0.10003  | 0.32113 +/- 0.18097  | 1             |
| O2-T4 Overall   | 0.3861 +/- 0.18172   | 0.3955 +/- 0.10332   | 0.7301587302  |
| O2-Fp1 Overall  | 0.32354 +/- 0.091721 | 0.29058 +/- 0.10855  | 0.5555555556  |
| O2-C3 Overall   | 0.28341 +/- 0.064559 | 0.24607 +/- 0.1406   | 0.4126984127  |
| O2-T3 Overall   | 0.26635 +/- 0.064945 | 0.29039 +/- 0.10723  | 0.5555555556  |
| O2-O1 Overall   | 0.37938 +/- 0.15976  | 0.40948 +/- 0.10116  | 0.9047619048  |
| T4-Fp1 Overall  | 0.28423 +/- 0.11831  | 0.21769 +/- 0.10768  | 0.1904761905  |
| T4-C3 Overall   | 0.28707 +/- 0.12892  | 0.19252 +/- 0.18098  | 0.1904761905  |
| T4-T3 Overall   | 0.28602 +/- 0.15153  | 0.23179 +/- 0.17148  | 0.7301587302  |
| T4-O1 Overall   | 0.31785 +/- 0.20383  | 0.26901 +/- 0.14193  | 0.9047619048  |
| Fp1-C3 Overall  | 0.3626 +/- 0.11902   | 0.47435 +/- 0.11492  | 0.1904761905  |
| Fp1-T3 Overall  | 0.33896 +/- 0.11182  | 0.41485 +/- 0.092341 | 0.2857142857  |
| Fp1-O1 Overall  | 0.41154 +/- 0.15087  | 0.3931 +/- 0.2233    | 0.7301587302  |
| C3-T3 Overall   | 0.32141 +/- 0.12297  | 0.60526 +/- 0.20605  | 0.06349206349 |
| C3-O1 Overall   | 0.34928 +/- 0.10939  | 0.36326 +/- 0.2078   | 0.9047619048  |

---

---

T3-O1 Overall 0.52538 +/- 0.25706 0.49262 +/- 0.37964 0.7301587302

---

**Table S16.** Overall power and power within each band at each electrode location, responders vs. nonresponders at baseline.

| <b>Band</b> | <b>Responder</b>      | <b>Nonresponder</b>  | <b><i>p</i></b> |
|-------------|-----------------------|----------------------|-----------------|
| Fp2 Theta   | -88.7476 +/- 190.7184 | 3.9453 +/- 17.6653   | 0.4126984127    |
| Fp2 Alpha   | -77.7953 +/- 168.5764 | 3.9215 +/- 14.8228   | 0.4126984127    |
| Fp2 Beta    | -38.0153 +/- 81.9785  | 3.9051 +/- 12.3888   | 0.4126984127    |
| Fp2 Delta   | -97.8747 +/- 209.1688 | 5.8223 +/- 23.9937   | 0.5555555556    |
| Fp2 Gamma   | 22.3515 +/- 46.4822   | 2.7708 +/- 2.1126    | 0.5555555556    |
| Fp2 Overall | -0.84427 +/- 5.2972   | -3.2852 +/- 3.0321   | 0.5555555556    |
| C4 Theta    | -26.5576 +/- 48.3814  | 21.4697 +/- 40.8932  | 0.06349206349   |
| C4 Alpha    | -22.9883 +/- 43.7827  | 16.0712 +/- 30.2145  | 0.06349206349   |
| C4 Beta     | -13.5931 +/- 26.0609  | 10.0012 +/- 17.6985  | 0.06349206349   |
| C4 Delta    | -30.137 +/- 53.9055   | 28.9849 +/- 56.0683  | 0.06349206349   |
| C4 Gamma    | 6.4729 +/- 10.703     | -3.0102 +/- 9.0175   | 0.2857142857    |
| C4 Overall  | -0.040596 +/- 5.5718  | 2.3646 +/- 5.1388    | 0.5555555556    |
| T4 Theta    | -5.063 +/- 8.3401     | 4.2408 +/- 8.3158    | 0.1904761905    |
| T4 Alpha    | -3.8213 +/- 6.8428    | 3.2828 +/- 6.4217    | 0.1904761905    |
| T4 Beta     | -1.7951 +/- 4.2483    | 2.31 +/- 4.5299      | 0.1904761905    |
| T4 Delta    | -6.1018 +/- 9.5156    | 5.1732 +/- 11.109    | 0.1904761905    |
| T4 Gamma    | 2.0586 +/- 1.6713     | 0.49218 +/- 1.4633   | 0.4126984127    |
| T4 Overall  | 2.9783 +/- 8.2406     | 3.1827 +/- 5.0326    | 0.9047619048    |
| O2 Theta    | -13.6977 +/- 27.9036  | -12.5931 +/- 22.6078 | 1               |
| O2 Alpha    | -11.4641 +/- 24.2671  | -9.8694 +/- 18.2305  | 1               |
| O2 Beta     | -6.0958 +/- 14.0333   | -6.7426 +/- 13.2438  | 1               |
| O2 Delta    | -15.7504 +/- 31.2809  | -14.9049 +/- 24.9415 | 1               |
| O2 Gamma    | 4.3303 +/- 6.4476     | 1.6145 +/- 0.76846   | 0.7301587302    |
| O2 Overall  | 2.7693 +/- 8.1794     | -0.81734 +/- 3.2665  | 0.7301587302    |
| Fp1 Theta   | -11.2994 +/- 13.4592  | -0.41362 +/- 6.3451  | 0.4126984127    |
| Fp1 Alpha   | -9.2018 +/- 11.3046   | -0.30883 +/- 4.581   | 0.4126984127    |
| Fp1 Beta    | -4.9644 +/- 6.8791    | 0.38994 +/- 3.7894   | 0.2857142857    |
| Fp1 Delta   | -13.4669 +/- 16.3458  | -0.52907 +/- 8.1962  | 0.4126984127    |
| Fp1 Gamma   | 3.4147 +/- 3.004      | 1.742 +/- 0.353      | 0.9047619048    |
| Fp1 Overall | -0.61286 +/- 5.0461   | -3.1759 +/- 3.6473   | 0.4126984127    |
| C3 Theta    | 18.2081 +/- 26.872    | -1.087 +/- 5.8534    | 0.1904761905    |
| C3 Alpha    | 13.6415 +/- 18.7374   | -0.56052 +/- 4.3479  | 0.1904761905    |
| C3 Beta     | 12.0817 +/- 18.0205   | 0.15598 +/- 3.0157   | 0.1904761905    |
| C3 Delta    | 21.6449 +/- 32.2861   | -1.9108 +/- 7.7547   | 0.1111111111    |
| C3 Gamma    | 0.69776 +/- 2.0797    | 1.6641 +/- 0.94985   | 0.9047619048    |
| C3 Overall  | 1.0985 +/- 2.7138     | 1.8305 +/- 6.0948    | 0.9047619048    |
| T3 Theta    | 37.9362 +/- 72.159    | -0.51708 +/- 5.2215  | 0.1904761905    |
| T3 Alpha    | 29.9524 +/- 56.2856   | -0.26395 +/- 3.9702  | 0.06349206349   |

---

|                 |                      |                      |              |
|-----------------|----------------------|----------------------|--------------|
| T3 Beta         | 20.6991 +/- 37.576   | 0.21443 +/- 2.9813   | 0.1111111111 |
| T3 Delta        | 46.6102 +/- 89.9466  | -1.0041 +/- 6.7677   | 0.1904761905 |
| T3 Gamma        | -2.8622 +/- 8.0081   | 1.4583 +/- 0.78852   | 0.2857142857 |
| T3 Overall      | 4.8702 +/- 3.8621    | 1.54 +/- 5.9038      | 0.4126984127 |
| O1 Theta        | 4.2785 +/- 8.7783    | -11.5345 +/- 22.2641 | 0.2857142857 |
| O1 Alpha        | 3.6955 +/- 6.7074    | -9.3346 +/- 18.2673  | 0.2857142857 |
| O1 Beta         | 2.6512 +/- 4.2908    | -6.0724 +/- 12.7109  | 0.2857142857 |
| O1 Delta        | 4.7182 +/- 10.3752   | -13.0014 +/- 23.9549 | 0.2857142857 |
| O1 Gamma        | 0.5171 +/- 1.4734    | 1.7927 +/- 0.6065    | 0.1904761905 |
| O1 Overall      | 3.4584 +/- 4.3841    | -1.2789 +/- 3.9847   | 0.1904761905 |
| R hemi Theta    | -33.5166 +/- 68.2927 | 4.2658 +/- 15.2843   | 0.5555555556 |
| R hemi Alpha    | -29.0172 +/- 60.48   | 3.3516 +/- 11.8124   | 0.5555555556 |
| R hemi Beta     | -14.8749 +/- 31.1816 | 2.3683 +/- 8.147     | 0.5555555556 |
| R hemi Delta    | -37.4651 +/- 75.2733 | 6.2686 +/- 19.488    | 0.5555555556 |
| R hemi Gamma    | 8.8033 +/- 16.3189   | 0.46683 +/- 2.6443   | 0.5555555556 |
| R hemi Overall  | 1.2156 +/- 6.6095    | 0.36117 +/- 3.6588   | 0.9047619048 |
| L hemi Theta    | 12.281 +/- 18.5603   | -3.3881 +/- 6.5282   | 0.1111111111 |
| L hemi Alpha    | 9.5219 +/- 14.421    | -2.617 +/- 5.0944    | 0.1111111111 |
| L hemi Beta     | 7.6169 +/- 9.7474    | -1.328 +/- 3.8348    | 0.1111111111 |
| L hemi Delta    | 14.8763 +/- 22.9223  | -4.1113 +/- 7.7481   | 0.1111111111 |
| L hemi Gamma    | 0.44186 +/- 2.3108   | 1.6643 +/- 0.58362   | 0.7301587302 |
| L hemi Overall  | 2.2036 +/- 3.6055    | -0.27108 +/- 4.5798  | 0.5555555556 |
| Overall Theta   | -10.6177 +/- 38.1871 | 0.43887 +/- 9.6024   | 0.9047619048 |
| Overall Alpha   | -9.7476 +/- 33.332   | 0.36722 +/- 7.616    | 0.9047619048 |
| Overall Beta    | -3.629 +/- 17.9351   | 0.5202 +/- 5.6204    | 0.9047619048 |
| Overall Delta   | -11.2947 +/- 42.7563 | 1.0787 +/- 11.6307   | 0.9047619048 |
| Overall Gamma   | 4.6227 +/- 8.4839    | 1.0655 +/- 1.055     | 0.9047619048 |
| Overall Overall | 1.7096 +/- 5.0134    | 0.04505 +/- 4.058    | 0.7301587302 |

**Table S17.** Hemispheric asymmetry, overall and within each band, responders vs. nonresponders at baseline.

| <b>Band</b>     | <b>Responder</b>     | <b>Nonresponder</b>  | <b><i>p</i></b> |
|-----------------|----------------------|----------------------|-----------------|
| Frontal Theta   | 77.4469 +/- 185.0394 | -4.3589 +/- 11.3392  | 0.7301587302    |
| Frontal Alpha   | 68.5919 +/- 162.9033 | -4.2303 +/- 10.2445  | 0.7301587302    |
| Frontal Beta    | 33.0507 +/- 80.4063  | -3.5151 +/- 8.6116   | 0.5555555556    |
| Frontal Delta   | 84.4094 +/- 203.637  | -6.3513 +/- 15.8759  | 0.7301587302    |
| Frontal Gamma   | -18.9366 +/- 43.9486 | -1.0288 +/- 1.9867   | 0.9047619048    |
| Frontal Overall | 0.2314 +/- 2.8832    | 0.10931 +/- 1.6368   | 0.9047619048    |
| Parietal Theta  | 44.765 +/- 54.8546   | -22.5568 +/- 45.3511 | 0.06349206349   |
| Parietal Alpha  | 36.6279 +/- 47.4097  | -16.6317 +/- 33.4354 | 0.06349206349   |
| Parietal Beta   | 25.6749 +/- 30.4103  | -9.8452 +/- 19.4355  | 0.06349206349   |
| Parietal Delta  | 51.7812 +/- 61.7961  | -30.8945 +/- 62.2689 | 0.06349206349   |
| Parietal Gamma  | -5.7752 +/- 12.0453  | 4.6744 +/- 9.9149    | 0.9047619048    |

|                   |                       |                      |               |
|-------------------|-----------------------|----------------------|---------------|
| Parietal Overall  | 1.1391 +/- 3.9803     | -0.53408 +/- 2.7845  | 0.5555555556  |
| Temporal Theta    | 42.9989 +/- 73.0282   | -4.7579 +/- 10.4373  | 0.1111111111  |
| Temporal Alpha    | 33.7728 +/- 56.9712   | -3.5469 +/- 7.6957   | 0.1111111111  |
| Temporal Beta     | 22.4942 +/- 38.3981   | -2.0955 +/- 4.5559   | 0.1111111111  |
| Temporal Delta    | 52.7117 +/- 91.3961   | -6.1772 +/- 13.8316  | 0.1904761905  |
| Temporal Gamma    | -4.9208 +/- 7.8382    | 0.96613 +/- 2.2438   | 0.4126984127  |
| Temporal Overall  | 1.8919 +/- 5.2844     | -1.6428 +/- 2.7397   | 0.2857142857  |
| Occipital Theta   | 17.9763 +/- 31.2241   | 1.0586 +/- 1.4327    | 1             |
| Occipital Alpha   | 15.1597 +/- 26.9177   | 0.53477 +/- 1.1043   | 0.7301587302  |
| Occipital Beta    | 8.7471 +/- 15.0519    | 0.67039 +/- 0.69932  | 1             |
| Occipital Delta   | 20.4684 +/- 34.9186   | 1.9033 +/- 1.9334    | 1             |
| Occipital Gamma   | -3.8132 +/- 7.4016    | 0.17817 +/- 0.71164  | 0.5555555556  |
| Occipital Overall | 0.68929 +/- 4.6354    | -0.46153 +/- 0.81194 | 0.4126984127  |
| Overall Theta     | 183.1888 +/- 258.7206 | -30.6151 +/- 54.1997 | 0.06349206349 |
| Overall Alpha     | 154.1549 +/- 229.344  | -23.8741 +/- 39.7904 | 0.06349206349 |
| Overall Beta      | 89.9679 +/- 116.4796  | -14.7856 +/- 23.9345 | 0.06349206349 |
| Overall Delta     | 209.3699 +/- 284.8495 | -41.5203 +/- 73.6026 | 0.06349206349 |
| Overall Gamma     | -33.4463 +/- 63.9263  | 4.7898 +/- 12.7829   | 0.4126984127  |
| Overall Overall   | 3.9517 +/- 14.3307    | -2.529 +/- 6.7589    | 0.4126984127  |

**Table S18.** Inter-electrode coherence measures in the overall spectrum, responders vs. nonresponders at baseline.

| <b>Band</b>   | <b>Responder</b>     | <b>Nonresponder</b>  | <b><i>p</i></b> |
|---------------|----------------------|----------------------|-----------------|
| Fp2-C4 Theta  | 0.51282 +/- 0.18869  | 0.24746 +/- 0.079216 | 0.1111111111    |
| Fp2-O2 Theta  | 0.48515 +/- 0.082119 | 0.38032 +/- 0.13825  | 0.4126984127    |
| Fp2-T4 Theta  | 0.44966 +/- 0.17677  | 0.28998 +/- 0.087546 | 0.1904761905    |
| Fp2-Fp1 Theta | 0.54116 +/- 0.16124  | 0.36314 +/- 0.12923  | 0.1111111111    |
| Fp2-C3 Theta  | 0.39194 +/- 0.11657  | 0.28099 +/- 0.17733  | 0.2857142857    |
| Fp2-T3 Theta  | 0.35963 +/- 0.18336  | 0.38372 +/- 0.1347   | 0.9047619048    |
| Fp2-O1 Theta  | 0.34403 +/- 0.17319  | 0.37646 +/- 0.097559 | 0.9047619048    |
| C4-O2 Theta   | 0.48201 +/- 0.25418  | 0.26637 +/- 0.11498  | 0.1111111111    |
| C4-T4 Theta   | 0.4165 +/- 0.19704   | 0.55592 +/- 0.37815  | 0.7301587302    |
| C4-Fp1 Theta  | 0.48349 +/- 0.15311  | 0.24661 +/- 0.07528  | 0.06349206349   |
| C4-C3 Theta   | 0.44953 +/- 0.20552  | 0.28984 +/- 0.10937  | 0.1904761905    |
| C4-T3 Theta   | 0.33298 +/- 0.16198  | 0.27204 +/- 0.078962 | 0.7301587302    |
| C4-O1 Theta   | 0.33779 +/- 0.15795  | 0.28662 +/- 0.097447 | 0.9047619048    |
| O2-T4 Theta   | 0.63253 +/- 0.22533  | 0.40084 +/- 0.30522  | 0.2857142857    |
| O2-Fp1 Theta  | 0.43456 +/- 0.16047  | 0.34524 +/- 0.13462  | 0.5555555556    |
| O2-C3 Theta   | 0.40407 +/- 0.20865  | 0.28476 +/- 0.12332  | 0.1904761905    |
| O2-T3 Theta   | 0.31517 +/- 0.17515  | 0.35083 +/- 0.14503  | 0.7301587302    |
| O2-O1 Theta   | 0.3473 +/- 0.14412   | 0.42943 +/- 0.14162  | 0.5555555556    |
| T4-Fp1 Theta  | 0.42257 +/- 0.16603  | 0.30873 +/- 0.14208  | 0.2857142857    |
| T4-C3 Theta   | 0.36826 +/- 0.1655   | 0.29096 +/- 0.13548  | 0.4126984127    |



|               |                      |                      |               |
|---------------|----------------------|----------------------|---------------|
| T4-T3 Theta   | 0.34489 +/- 0.17842  | 0.34037 +/- 0.097892 | 0.7301587302  |
| T4-O1 Theta   | 0.31505 +/- 0.17346  | 0.35036 +/- 0.15918  | 0.7301587302  |
| Fp1-C3 Theta  | 0.48283 +/- 0.11404  | 0.45379 +/- 0.30584  | 0.9047619048  |
| Fp1-T3 Theta  | 0.42111 +/- 0.25939  | 0.39749 +/- 0.12561  | 0.9047619048  |
| Fp1-O1 Theta  | 0.45286 +/- 0.22995  | 0.45428 +/- 0.073792 | 0.9047619048  |
| C3-T3 Theta   | 0.295 +/- 0.16708    | 0.50268 +/- 0.31158  | 0.4126984127  |
| C3-O1 Theta   | 0.35445 +/- 0.14385  | 0.39399 +/- 0.20214  | 0.9047619048  |
| T3-O1 Theta   | 0.62977 +/- 0.22173  | 0.47455 +/- 0.18105  | 0.9047619048  |
| Fp2-C4 Alpha  | 0.43368 +/- 0.18652  | 0.27451 +/- 0.07985  | 0.2857142857  |
| Fp2-O2 Alpha  | 0.38415 +/- 0.1176   | 0.4028 +/- 0.181     | 0.9047619048  |
| Fp2-T4 Alpha  | 0.36509 +/- 0.12063  | 0.30747 +/- 0.10223  | 0.7301587302  |
| Fp2-Fp1 Alpha | 0.45069 +/- 0.1892   | 0.45899 +/- 0.19651  | 1             |
| Fp2-C3 Alpha  | 0.37862 +/- 0.12974  | 0.40536 +/- 0.18662  | 0.7301587302  |
| Fp2-T3 Alpha  | 0.35046 +/- 0.17591  | 0.45428 +/- 0.16665  | 0.2857142857  |
| Fp2-O1 Alpha  | 0.3443 +/- 0.1812    | 0.42202 +/- 0.14432  | 0.4126984127  |
| C4-O2 Alpha   | 0.43136 +/- 0.21116  | 0.27806 +/- 0.1004   | 0.4126984127  |
| C4-T4 Alpha   | 0.32152 +/- 0.11725  | 0.56205 +/- 0.3604   | 0.4126984127  |
| C4-Fp1 Alpha  | 0.4571 +/- 0.12856   | 0.30469 +/- 0.10182  | 0.1111111111  |
| C4-C3 Alpha   | 0.46439 +/- 0.17408  | 0.32939 +/- 0.1168   | 0.4126984127  |
| C4-T3 Alpha   | 0.34374 +/- 0.19024  | 0.29066 +/- 0.10614  | 1             |
| C4-O1 Alpha   | 0.36973 +/- 0.1842   | 0.3053 +/- 0.11055   | 0.7301587302  |
| O2-T4 Alpha   | 0.52012 +/- 0.18899  | 0.44537 +/- 0.28831  | 0.5555555556  |
| O2-Fp1 Alpha  | 0.3822 +/- 0.10483   | 0.4495 +/- 0.16919   | 0.5555555556  |
| O2-C3 Alpha   | 0.36889 +/- 0.18614  | 0.44335 +/- 0.111    | 0.4126984127  |
| O2-T3 Alpha   | 0.32065 +/- 0.15743  | 0.40519 +/- 0.1581   | 0.5555555556  |
| O2-O1 Alpha   | 0.39585 +/- 0.13226  | 0.51436 +/- 0.11921  | 0.2857142857  |
| T4-Fp1 Alpha  | 0.34081 +/- 0.1201   | 0.40557 +/- 0.17119  | 0.7301587302  |
| T4-C3 Alpha   | 0.32717 +/- 0.10163  | 0.37146 +/- 0.11926  | 0.9047619048  |
| T4-T3 Alpha   | 0.31138 +/- 0.15814  | 0.37104 +/- 0.12729  | 0.5555555556  |
| T4-O1 Alpha   | 0.30272 +/- 0.11058  | 0.3969 +/- 0.16155   | 0.4126984127  |
| Fp1-C3 Alpha  | 0.48494 +/- 0.058442 | 0.56799 +/- 0.21426  | 0.5555555556  |
| Fp1-T3 Alpha  | 0.40934 +/- 0.25317  | 0.49563 +/- 0.14488  | 0.4126984127  |
| Fp1-O1 Alpha  | 0.48801 +/- 0.25109  | 0.62824 +/- 0.066318 | 0.2857142857  |
| C3-T3 Alpha   | 0.26975 +/- 0.13853  | 0.55846 +/- 0.33026  | 0.06349206349 |
| C3-O1 Alpha   | 0.4016 +/- 0.13932   | 0.53582 +/- 0.14137  | 0.1111111111  |
| T3-O1 Alpha   | 0.5744 +/- 0.25128   | 0.51619 +/- 0.19646  | 0.7301587302  |
| Fp2-C4 Beta   | 0.44352 +/- 0.19844  | 0.34299 +/- 0.11235  | 0.5555555556  |
| Fp2-O2 Beta   | 0.39514 +/- 0.11889  | 0.44825 +/- 0.21087  | 0.7301587302  |
| Fp2-T4 Beta   | 0.29826 +/- 0.10105  | 0.33695 +/- 0.1194   | 0.2857142857  |
| Fp2-Fp1 Beta  | 0.37658 +/- 0.13543  | 0.45688 +/- 0.18162  | 0.5555555556  |
| Fp2-C3 Beta   | 0.36927 +/- 0.16364  | 0.38172 +/- 0.15561  | 0.9047619048  |
| Fp2-T3 Beta   | 0.28667 +/- 0.13814  | 0.42116 +/- 0.15072  | 0.4126984127  |
| Fp2-O1 Beta   | 0.31049 +/- 0.12428  | 0.45271 +/- 0.18078  | 0.2857142857  |

---

|               |                      |                      |               |
|---------------|----------------------|----------------------|---------------|
| C4-O2 Beta    | 0.42814 +/- 0.17289  | 0.26045 +/- 0.063325 | 0.1904761905  |
| C4-T4 Beta    | 0.30893 +/- 0.10732  | 0.55748 +/- 0.33206  | 0.4126984127  |
| C4-Fp1 Beta   | 0.40206 +/- 0.14613  | 0.3194 +/- 0.13577   | 0.7301587302  |
| C4-C3 Beta    | 0.45924 +/- 0.15561  | 0.32499 +/- 0.13723  | 0.1904761905  |
| C4-T3 Beta    | 0.27975 +/- 0.12043  | 0.30646 +/- 0.11774  | 0.7301587302  |
| C4-O1 Beta    | 0.3241 +/- 0.11295   | 0.32235 +/- 0.13075  | 0.9047619048  |
| O2-T4 Beta    | 0.47593 +/- 0.21538  | 0.44836 +/- 0.24142  | 0.7301587302  |
| O2-Fp1 Beta   | 0.35491 +/- 0.081732 | 0.55446 +/- 0.10316  | 0.01587301587 |
| O2-C3 Beta    | 0.36214 +/- 0.17383  | 0.48994 +/- 0.058556 | 0.1904761905  |
| O2-T3 Beta    | 0.31996 +/- 0.12167  | 0.42214 +/- 0.10412  | 0.4126984127  |
| O2-O1 Beta    | 0.3652 +/- 0.13259   | 0.6264 +/- 0.041948  | 0.01587301587 |
| T4-Fp1 Beta   | 0.31479 +/- 0.14617  | 0.4682 +/- 0.17664   | 0.2857142857  |
| T4-C3 Beta    | 0.28702 +/- 0.0924   | 0.39463 +/- 0.12486  | 0.2857142857  |
| T4-T3 Beta    | 0.30876 +/- 0.14749  | 0.39771 +/- 0.13751  | 0.4126984127  |
| T4-O1 Beta    | 0.29184 +/- 0.13191  | 0.45264 +/- 0.16743  | 0.1111111111  |
| Fp1-C3 Beta   | 0.44044 +/- 0.1305   | 0.64528 +/- 0.21992  | 0.4126984127  |
| Fp1-T3 Beta   | 0.33234 +/- 0.15718  | 0.51269 +/- 0.19405  | 0.2857142857  |
| Fp1-O1 Beta   | 0.48919 +/- 0.16674  | 0.7505 +/- 0.092113  | 0.1111111111  |
| C3-T3 Beta    | 0.26187 +/- 0.12649  | 0.50091 +/- 0.32353  | 0.1111111111  |
| C3-O1 Beta    | 0.38392 +/- 0.12937  | 0.6236 +/- 0.1967    | 0.1111111111  |
| T3-O1 Beta    | 0.46772 +/- 0.2185   | 0.51282 +/- 0.22514  | 1             |
| Fp2-C4 Delta  | 0.49519 +/- 0.20818  | 0.25081 +/- 0.10857  | 0.1904761905  |
| Fp2-O2 Delta  | 0.38972 +/- 0.13235  | 0.31749 +/- 0.092702 | 0.5555555556  |
| Fp2-T4 Delta  | 0.40246 +/- 0.20909  | 0.30131 +/- 0.092662 | 0.5555555556  |
| Fp2-Fp1 Delta | 0.40987 +/- 0.20164  | 0.34107 +/- 0.07803  | 1             |
| Fp2-C3 Delta  | 0.33638 +/- 0.058941 | 0.30125 +/- 0.14193  | 0.4126984127  |
| Fp2-T3 Delta  | 0.32243 +/- 0.13777  | 0.38312 +/- 0.10068  | 0.5555555556  |
| Fp2-O1 Delta  | 0.31977 +/- 0.10497  | 0.34174 +/- 0.1087   | 0.7301587302  |
| C4-O2 Delta   | 0.36827 +/- 0.2344   | 0.23755 +/- 0.076212 | 0.4126984127  |
| C4-T4 Delta   | 0.4341 +/- 0.23796   | 0.57446 +/- 0.32214  | 0.5555555556  |
| C4-Fp1 Delta  | 0.38257 +/- 0.15344  | 0.24542 +/- 0.095208 | 0.1904761905  |
| C4-C3 Delta   | 0.37036 +/- 0.10035  | 0.27346 +/- 0.09969  | 0.4126984127  |
| C4-T3 Delta   | 0.29464 +/- 0.12066  | 0.25691 +/- 0.071215 | 0.7301587302  |
| C4-O1 Delta   | 0.31546 +/- 0.091814 | 0.23443 +/- 0.074507 | 0.1111111111  |
| O2-T4 Delta   | 0.58649 +/- 0.24378  | 0.38612 +/- 0.29641  | 0.2857142857  |
| O2-Fp1 Delta  | 0.28603 +/- 0.13889  | 0.29645 +/- 0.14574  | 1             |
| O2-C3 Delta   | 0.30781 +/- 0.12823  | 0.28703 +/- 0.11353  | 0.5555555556  |
| O2-T3 Delta   | 0.23034 +/- 0.076135 | 0.31529 +/- 0.13318  | 0.2857142857  |
| O2-O1 Delta   | 0.26591 +/- 0.079462 | 0.38614 +/- 0.15031  | 0.4126984127  |
| T4-Fp1 Delta  | 0.31119 +/- 0.11437  | 0.26755 +/- 0.12737  | 0.4126984127  |
| T4-C3 Delta   | 0.29773 +/- 0.11952  | 0.2662 +/- 0.10986   | 0.7301587302  |
| T4-T3 Delta   | 0.29494 +/- 0.09115  | 0.28524 +/- 0.10629  | 0.9047619048  |
| T4-O1 Delta   | 0.27567 +/- 0.085823 | 0.28298 +/- 0.15928  | 0.9047619048  |

---

|                 |                      |                      |               |
|-----------------|----------------------|----------------------|---------------|
| Fp1-C3 Delta    | 0.40378 +/- 0.12796  | 0.45963 +/- 0.26901  | 0.9047619048  |
| Fp1-T3 Delta    | 0.32507 +/- 0.15448  | 0.39632 +/- 0.1352   | 0.5555555556  |
| Fp1-O1 Delta    | 0.42482 +/- 0.13158  | 0.37075 +/- 0.13767  | 0.9047619048  |
| C3-T3 Delta     | 0.27909 +/- 0.14089  | 0.4931 +/- 0.34428   | 0.2857142857  |
| C3-O1 Delta     | 0.34965 +/- 0.12732  | 0.36913 +/- 0.15827  | 0.9047619048  |
| T3-O1 Delta     | 0.54534 +/- 0.21871  | 0.40714 +/- 0.1522   | 0.7301587302  |
| Fp2-C4 Gamma    | 0.42578 +/- 0.23464  | 0.46634 +/- 0.23149  | 0.9047619048  |
| Fp2-O2 Gamma    | 0.35362 +/- 0.15283  | 0.51696 +/- 0.21213  | 0.2857142857  |
| Fp2-T4 Gamma    | 0.27868 +/- 0.12866  | 0.35884 +/- 0.14227  | 0.2857142857  |
| Fp2-Fp1 Gamma   | 0.33614 +/- 0.15553  | 0.43845 +/- 0.22511  | 0.5555555556  |
| Fp2-C3 Gamma    | 0.33329 +/- 0.13332  | 0.46764 +/- 0.21884  | 0.2857142857  |
| Fp2-T3 Gamma    | 0.25128 +/- 0.14062  | 0.45869 +/- 0.22674  | 0.2857142857  |
| Fp2-O1 Gamma    | 0.25261 +/- 0.13564  | 0.44519 +/- 0.20192  | 0.2857142857  |
| C4-O2 Gamma     | 0.38011 +/- 0.1654   | 0.31621 +/- 0.11594  | 0.7301587302  |
| C4-T4 Gamma     | 0.30661 +/- 0.12469  | 0.52324 +/- 0.3423   | 0.4126984127  |
| C4-Fp1 Gamma    | 0.33958 +/- 0.17449  | 0.28702 +/- 0.14655  | 0.7301587302  |
| C4-C3 Gamma     | 0.38879 +/- 0.157    | 0.33133 +/- 0.12064  | 0.7301587302  |
| C4-T3 Gamma     | 0.26981 +/- 0.12773  | 0.30223 +/- 0.11422  | 0.9047619048  |
| C4-O1 Gamma     | 0.27424 +/- 0.12865  | 0.2948 +/- 0.14068   | 1             |
| O2-T4 Gamma     | 0.49939 +/- 0.24394  | 0.42929 +/- 0.21053  | 0.5555555556  |
| O2-Fp1 Gamma    | 0.30242 +/- 0.090945 | 0.51841 +/- 0.047835 | 0.01587301587 |
| O2-C3 Gamma     | 0.35136 +/- 0.12306  | 0.52013 +/- 0.13525  | 0.1904761905  |
| O2-T3 Gamma     | 0.28621 +/- 0.11125  | 0.50641 +/- 0.18332  | 0.1904761905  |
| O2-O1 Gamma     | 0.31241 +/- 0.093972 | 0.62947 +/- 0.10296  | 0.01587301587 |
| T4-Fp1 Gamma    | 0.31512 +/- 0.10946  | 0.38578 +/- 0.10365  | 0.2857142857  |
| T4-C3 Gamma     | 0.29512 +/- 0.072966 | 0.376 +/- 0.085589   | 0.2857142857  |
| T4-T3 Gamma     | 0.31183 +/- 0.12636  | 0.4427 +/- 0.11606   | 0.1904761905  |
| T4-O1 Gamma     | 0.2965 +/- 0.10126   | 0.38245 +/- 0.13796  | 0.5555555556  |
| Fp1-C3 Gamma    | 0.41827 +/- 0.15398  | 0.60691 +/- 0.22268  | 0.4126984127  |
| Fp1-T3 Gamma    | 0.26566 +/- 0.15356  | 0.51877 +/- 0.18167  | 0.1111111111  |
| Fp1-O1 Gamma    | 0.36435 +/- 0.097116 | 0.61956 +/- 0.11947  | 0.03174603175 |
| C3-T3 Gamma     | 0.3102 +/- 0.1328    | 0.61605 +/- 0.31893  | 0.1111111111  |
| C3-O1 Gamma     | 0.35497 +/- 0.15331  | 0.55266 +/- 0.11568  | 0.1904761905  |
| T3-O1 Gamma     | 0.45018 +/- 0.23723  | 0.47719 +/- 0.19973  | 0.9047619048  |
| Fp2-C4 Overall  | 0.4443 +/- 0.20127   | 0.36427 +/- 0.17111  | 0.9047619048  |
| Fp2-O2 Overall  | 0.36039 +/- 0.084047 | 0.4537 +/- 0.12848   | 0.4126984127  |
| Fp2-T4 Overall  | 0.32982 +/- 0.095746 | 0.29388 +/- 0.10473  | 0.9047619048  |
| Fp2-Fp1 Overall | 0.38863 +/- 0.090776 | 0.44521 +/- 0.11825  | 0.4126984127  |
| Fp2-C3 Overall  | 0.34057 +/- 0.093367 | 0.41362 +/- 0.12998  | 0.5555555556  |
| Fp2-T3 Overall  | 0.30251 +/- 0.12197  | 0.43622 +/- 0.14193  | 0.1904761905  |
| Fp2-O1 Overall  | 0.30077 +/- 0.10751  | 0.42225 +/- 0.085964 | 0.1111111111  |
| C4-O2 Overall   | 0.40038 +/- 0.15891  | 0.26704 +/- 0.072157 | 0.1904761905  |
| C4-T4 Overall   | 0.33611 +/- 0.12663  | 0.54918 +/- 0.35303  | 0.5555555556  |

---

|                |                      |                      |               |
|----------------|----------------------|----------------------|---------------|
| C4-Fp1 Overall | 0.40849 +/- 0.085805 | 0.24766 +/- 0.070981 | 0.06349206349 |
| C4-C3 Overall  | 0.42448 +/- 0.15693  | 0.31536 +/- 0.097107 | 0.1904761905  |
| C4-T3 Overall  | 0.32252 +/- 0.10907  | 0.28437 +/- 0.11026  | 0.7301587302  |
| C4-O1 Overall  | 0.31173 +/- 0.1216   | 0.26438 +/- 0.074244 | 1             |
| O2-T4 Overall  | 0.54329 +/- 0.2094   | 0.40049 +/- 0.18726  | 0.5555555556  |
| O2-Fp1 Overall | 0.33127 +/- 0.079242 | 0.49623 +/- 0.094799 | 0.03174603175 |
| O2-C3 Overall  | 0.35902 +/- 0.15582  | 0.4597 +/- 0.061318  | 0.1904761905  |
| O2-T3 Overall  | 0.31211 +/- 0.08785  | 0.46234 +/- 0.12245  | 0.1111111111  |
| O2-O1 Overall  | 0.3555 +/- 0.13115   | 0.61072 +/- 0.053838 | 0.01587301587 |
| T4-Fp1 Overall | 0.34019 +/- 0.13297  | 0.32514 +/- 0.098092 | 1             |
| T4-C3 Overall  | 0.32286 +/- 0.10581  | 0.35086 +/- 0.12241  | 0.7301587302  |
| T4-T3 Overall  | 0.31054 +/- 0.10131  | 0.41141 +/- 0.15008  | 0.4126984127  |
| T4-O1 Overall  | 0.32935 +/- 0.08642  | 0.36827 +/- 0.1143   | 0.9047619048  |
| Fp1-C3 Overall | 0.46226 +/- 0.15745  | 0.54666 +/- 0.23652  | 0.7301587302  |
| Fp1-T3 Overall | 0.31556 +/- 0.094544 | 0.46908 +/- 0.13863  | 0.1111111111  |
| Fp1-O1 Overall | 0.3986 +/- 0.10559   | 0.56135 +/- 0.12503  | 0.1111111111  |
| C3-T3 Overall  | 0.33989 +/- 0.13487  | 0.59331 +/- 0.32634  | 0.2857142857  |
| C3-O1 Overall  | 0.36607 +/- 0.12722  | 0.5248 +/- 0.1618    | 0.1904761905  |
| T3-O1 Overall  | 0.45151 +/- 0.20726  | 0.52273 +/- 0.13885  | 0.5555555556  |

---
